# Supplementary material
Source: PubMed Central journal article supplement (PMC3433405)

**C-H Bond Functionalization via Hydride Transfer: Formation of  $\alpha$ -Arylated Piperidines and 1,2,3,4-Tetrahydroisoquinolines via Stereoselective Intramolecular Amination of Benzylic C-H Bonds**

Paul A. Vadola, Ignacio Carrera and Dalibor Sames\*

*Department of Chemistry, Columbia University,  
3000 Broadway, New York, New York, 10027*

**Supporting Information**

NMR Spectra for HT-amination Substrates and **S6**

| Substrate                                                                                                                | Proton Spectrum | Carbon Spectrum |
|--------------------------------------------------------------------------------------------------------------------------|-----------------|-----------------|
| <i>N</i> -(2-(4-methoxyphenethyl)benzylidene)-4-methylbenzenesulfonamide (1).                                            | 3               | 4               |
| 5-(4-methoxyphenyl)-2,2-dimethylpentanal (4).                                                                            | 5               | 6               |
| 1-(3-(4-methoxyphenyl)propyl)cyclohexanecarbaldehyde (6).                                                                | 7               | 8               |
| 5-(4-methoxyphenyl)-3,3-dimethylpentanal (8).                                                                            | 9               | 10              |
| 5-(4-methoxyphenyl)-3-methylpentanal (10).                                                                               | 11              | 12              |
| 2,2-dimethyl-5-phenylpentanal (16).                                                                                      | 13              | 14              |
| 5-(4-methoxyphenyl)-2-methylpentanal (18).                                                                               | 15              | 16              |
| 5-(4-methoxyphenyl)-3-phenylpentanal (20).                                                                               | 17              | 18              |
| 5-(2-methoxyphenyl)-2-methylpentanal (22).                                                                               | 19              | 20              |
| 5-(3-methoxyphenyl)-2-methylpentanal (24).                                                                               | 21              | 22              |
| 5-fluoro-2-(4-methoxyphenethyl)benzaldehyde (28).                                                                        | 23              | 24              |
| 4-fluoro-2-(4-methoxyphenethyl)benzaldehyde (30).                                                                        | 25              | 26              |
| 4,5-difluoro-2-(4-methoxyphenethyl)benzaldehyde (32).                                                                    | 27              | 28              |
| 1-(4-methoxyphenethyl)naphthalene-2-carbaldehyde (34).                                                                   | 29              | 30              |
| 2-(2-(biphenyl-4-yl)ethyl)benzaldehyde (38).                                                                             | 31              | 32              |
| 2-(4-methoxy-2-methylphenethyl)benzaldehyde (40).                                                                        | 33              | 34              |
| 2-(2-(6-methoxynaphthalen-2-yl)ethyl)benzaldehyde (42).                                                                  | 35              | 36              |
| ( <i>S</i> )-5-(4-methoxyphenyl)-2-methylpentanal (S5).                                                                  | 37              | 38              |
| ( <i>S</i> )-2-(methoxymethyl)- <i>N</i> -(( <i>S</i> )-5-(4-methoxyphenyl)-2-methylpentylidene)pyrrolidin-1-amine (S6). | 39              | 40              |

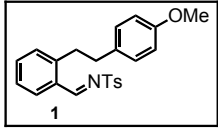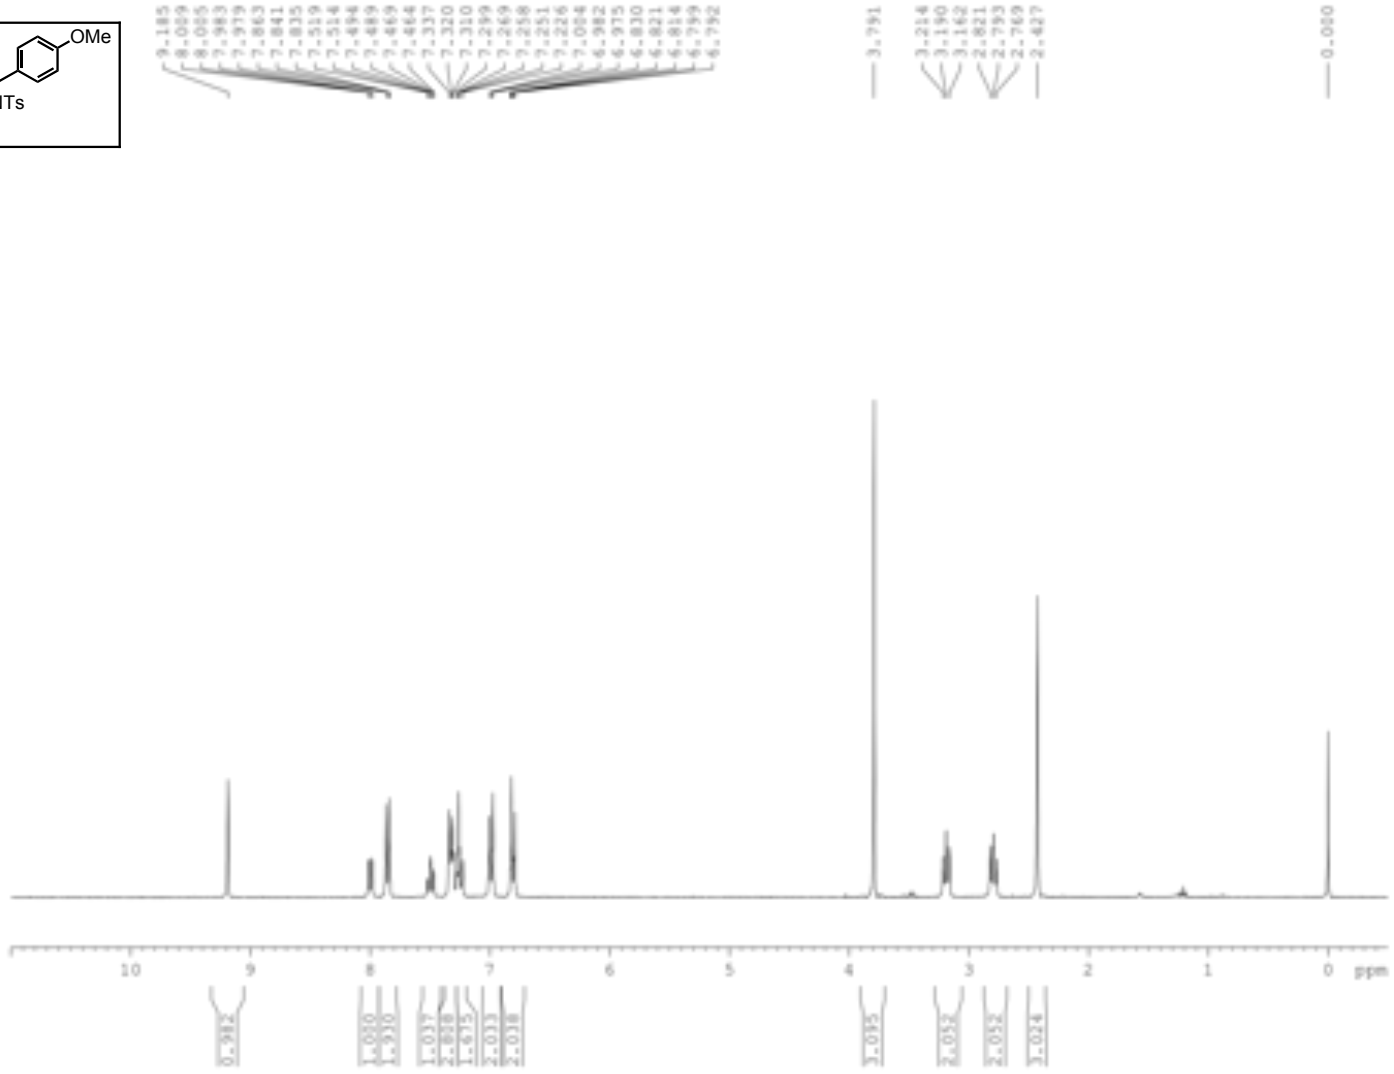

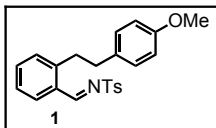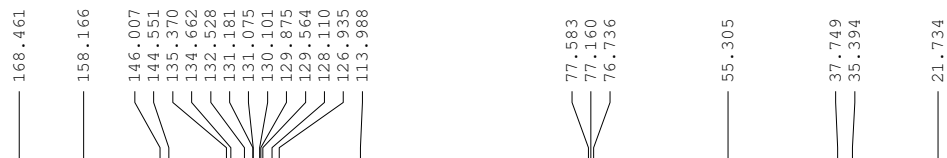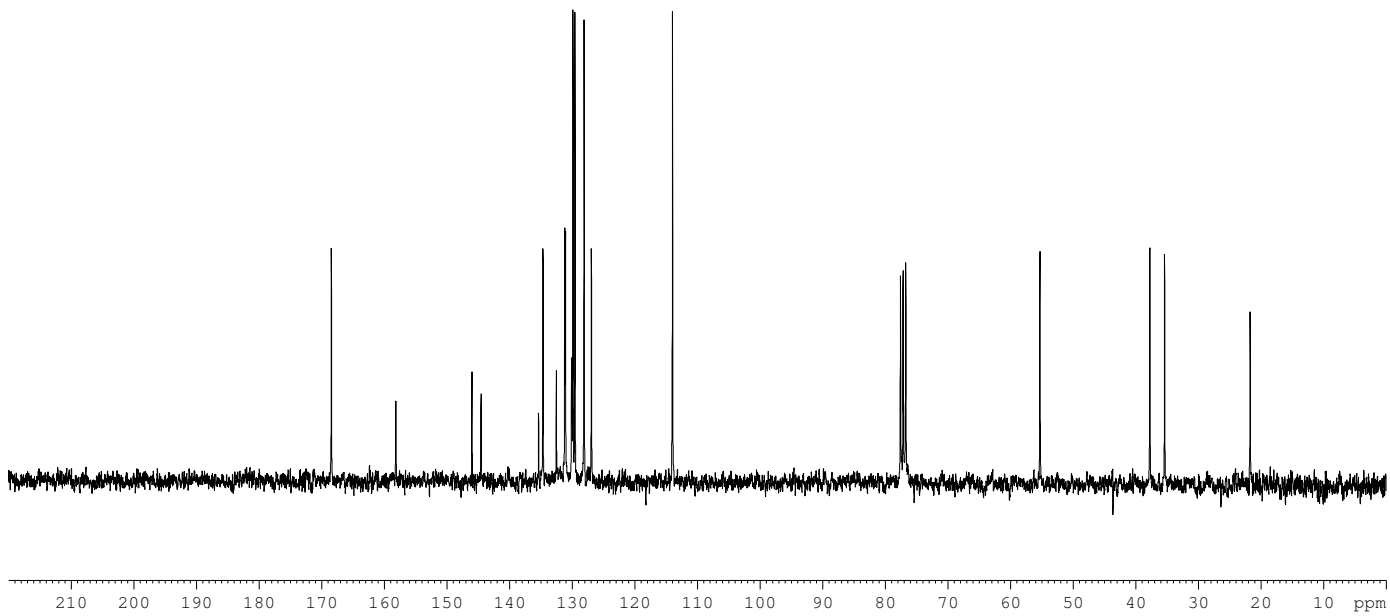

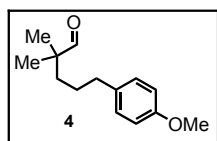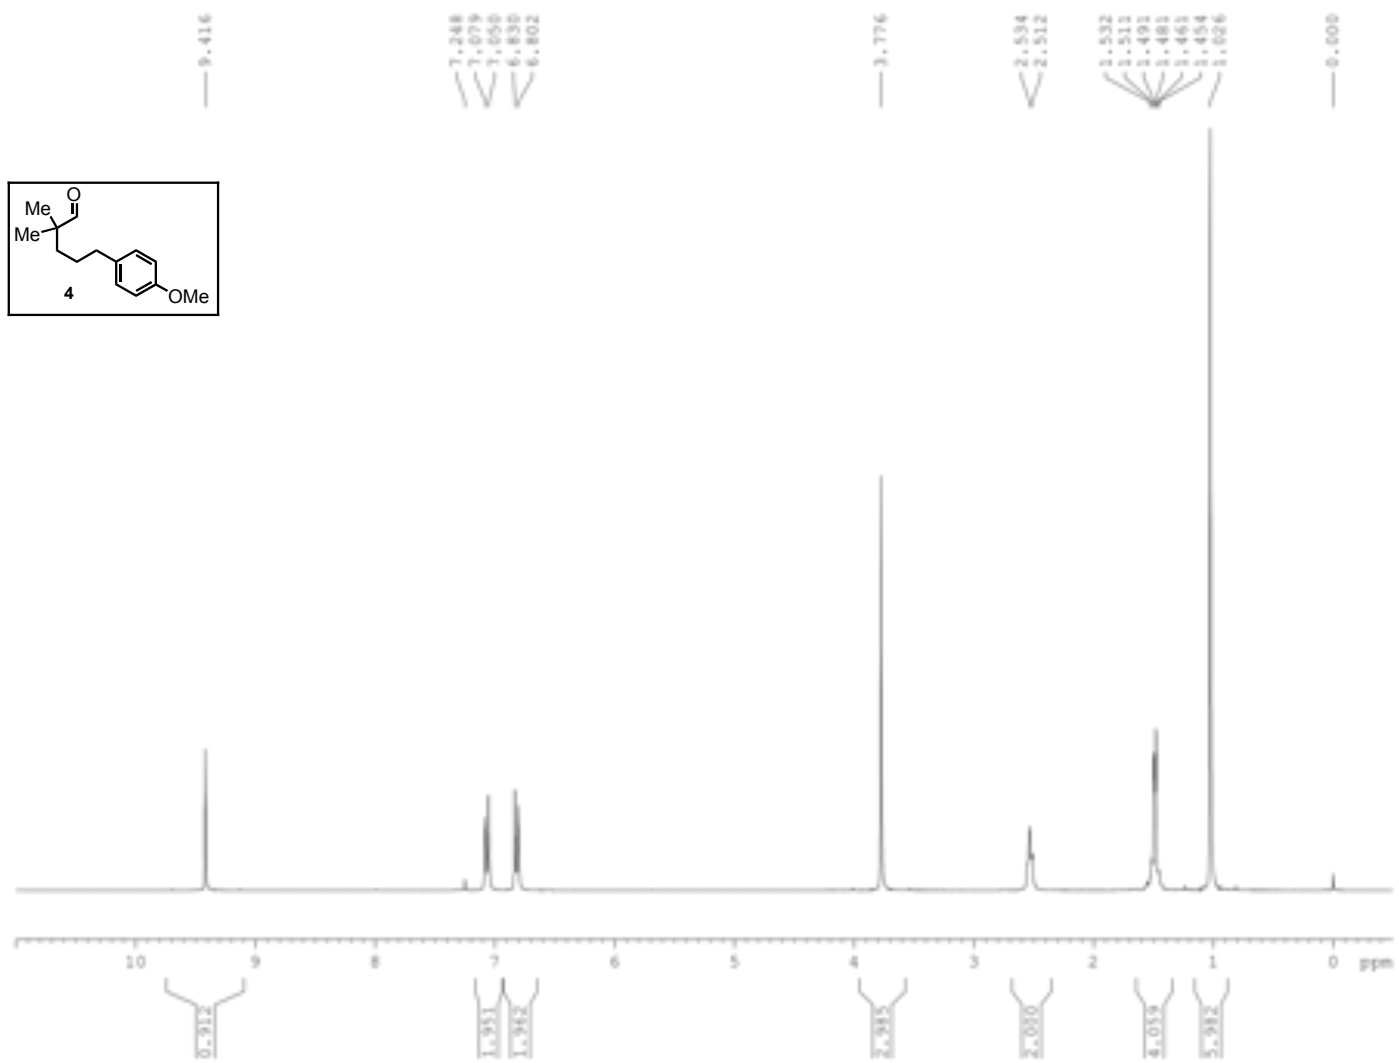

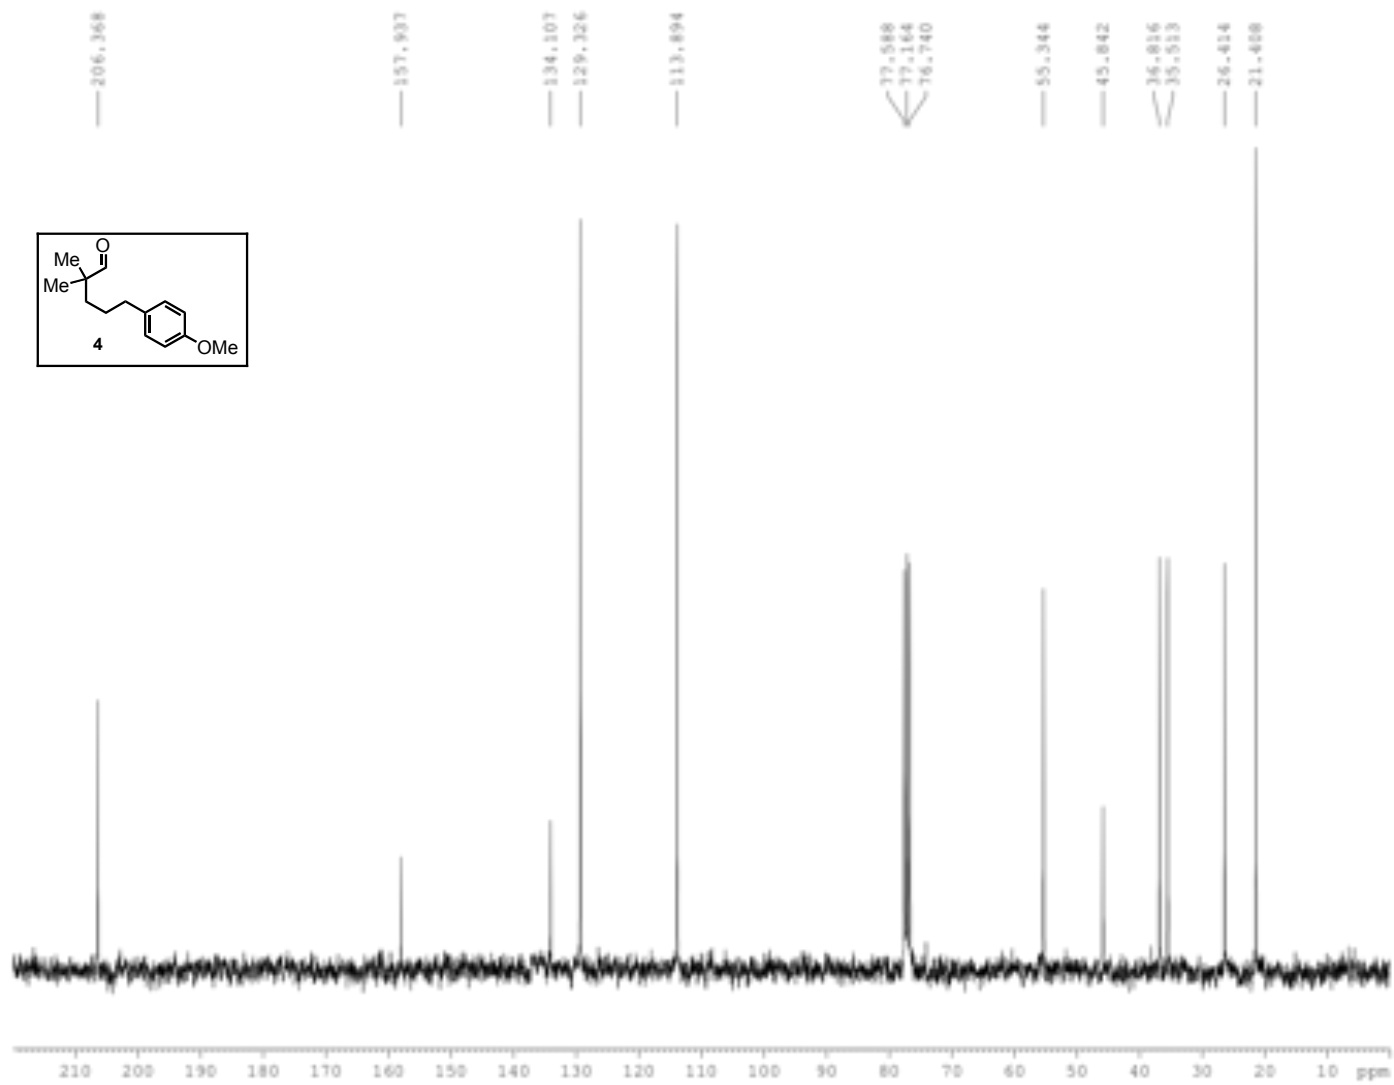

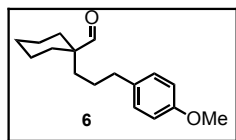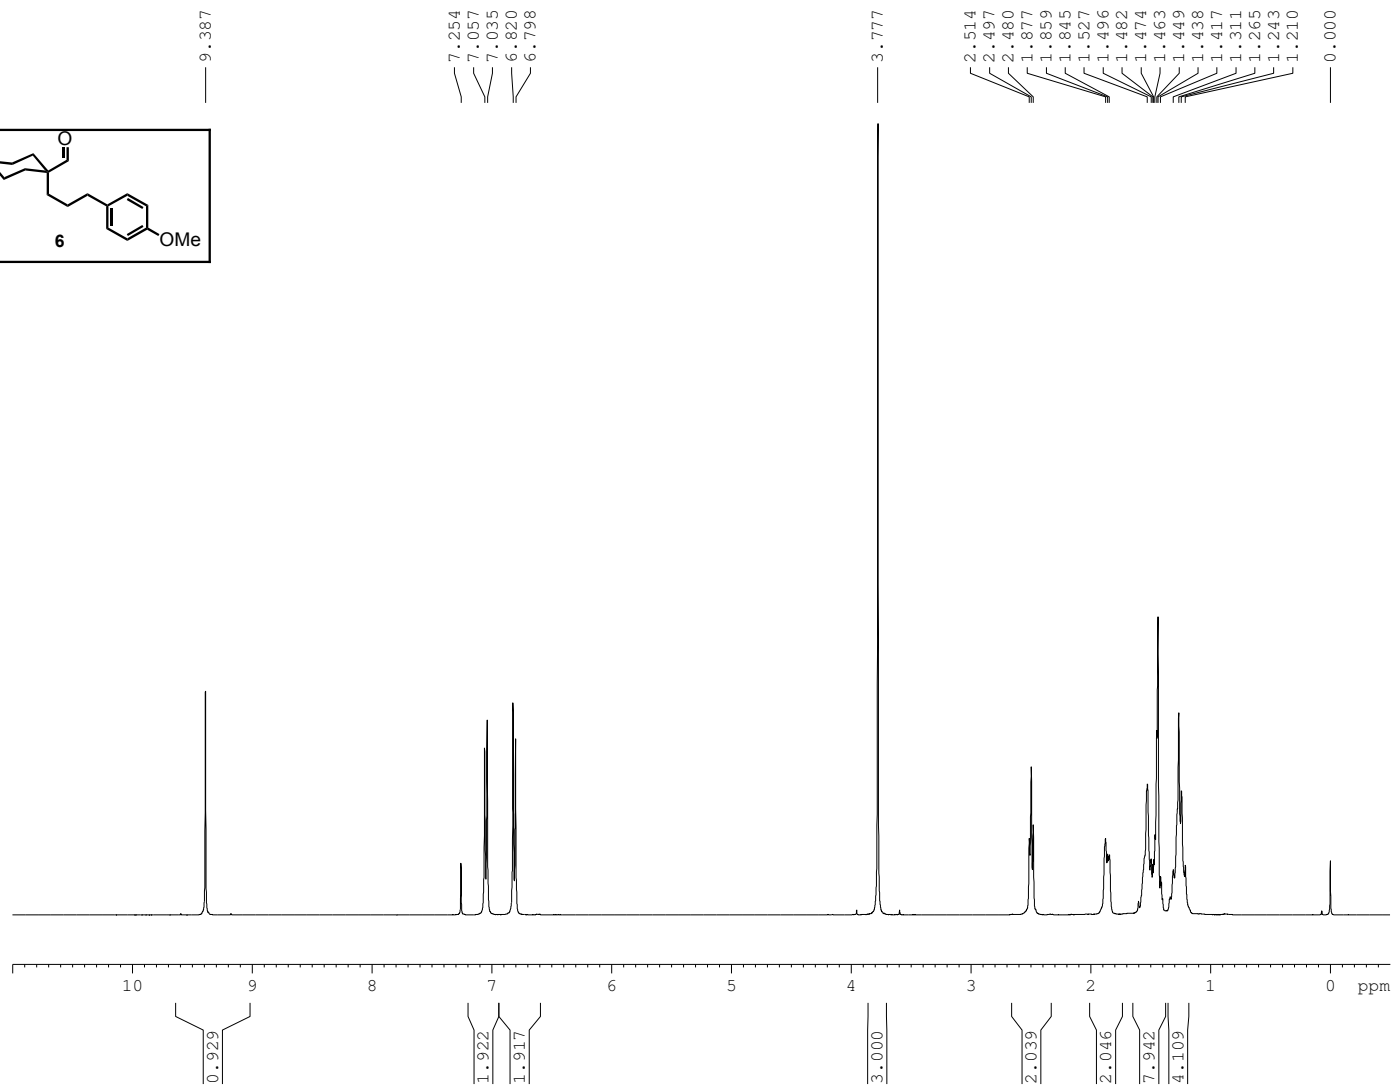

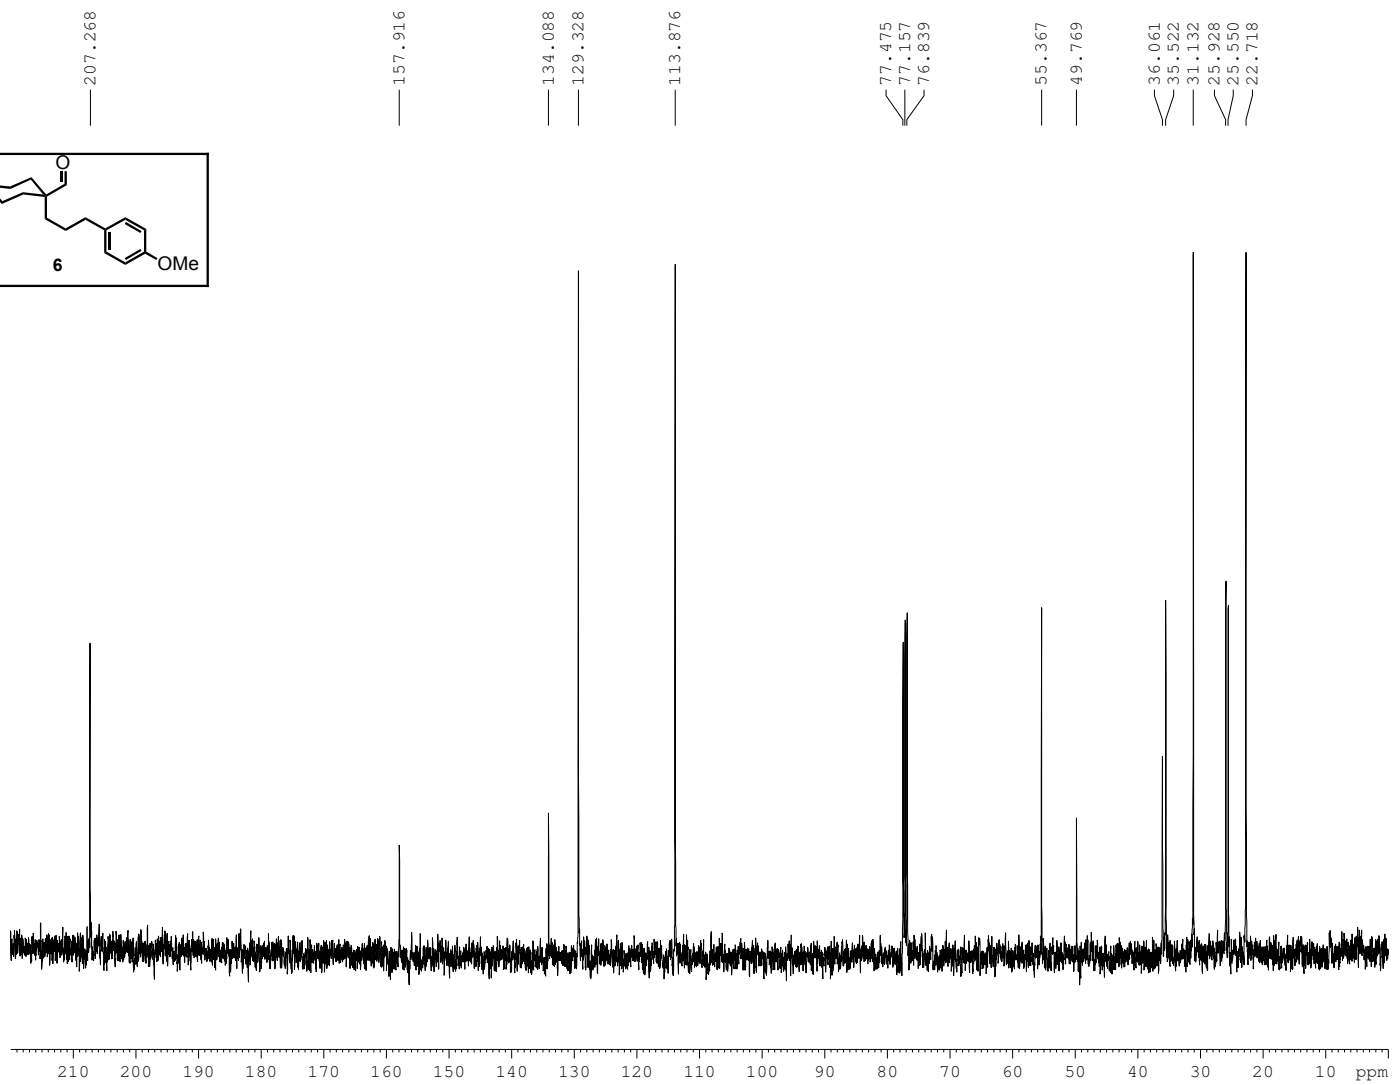



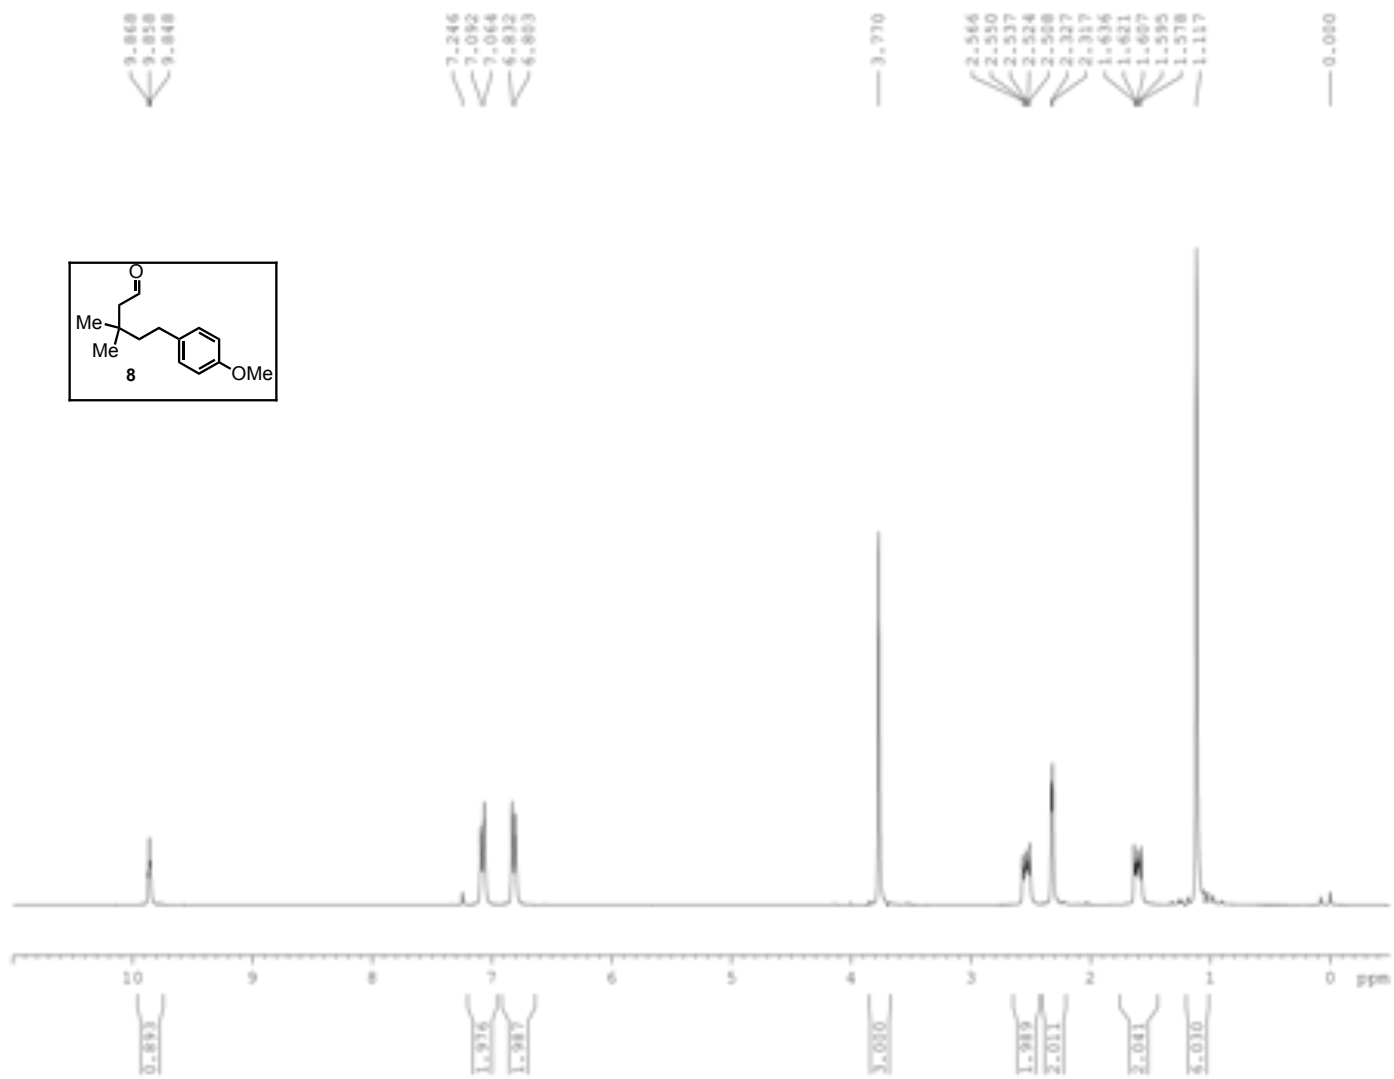

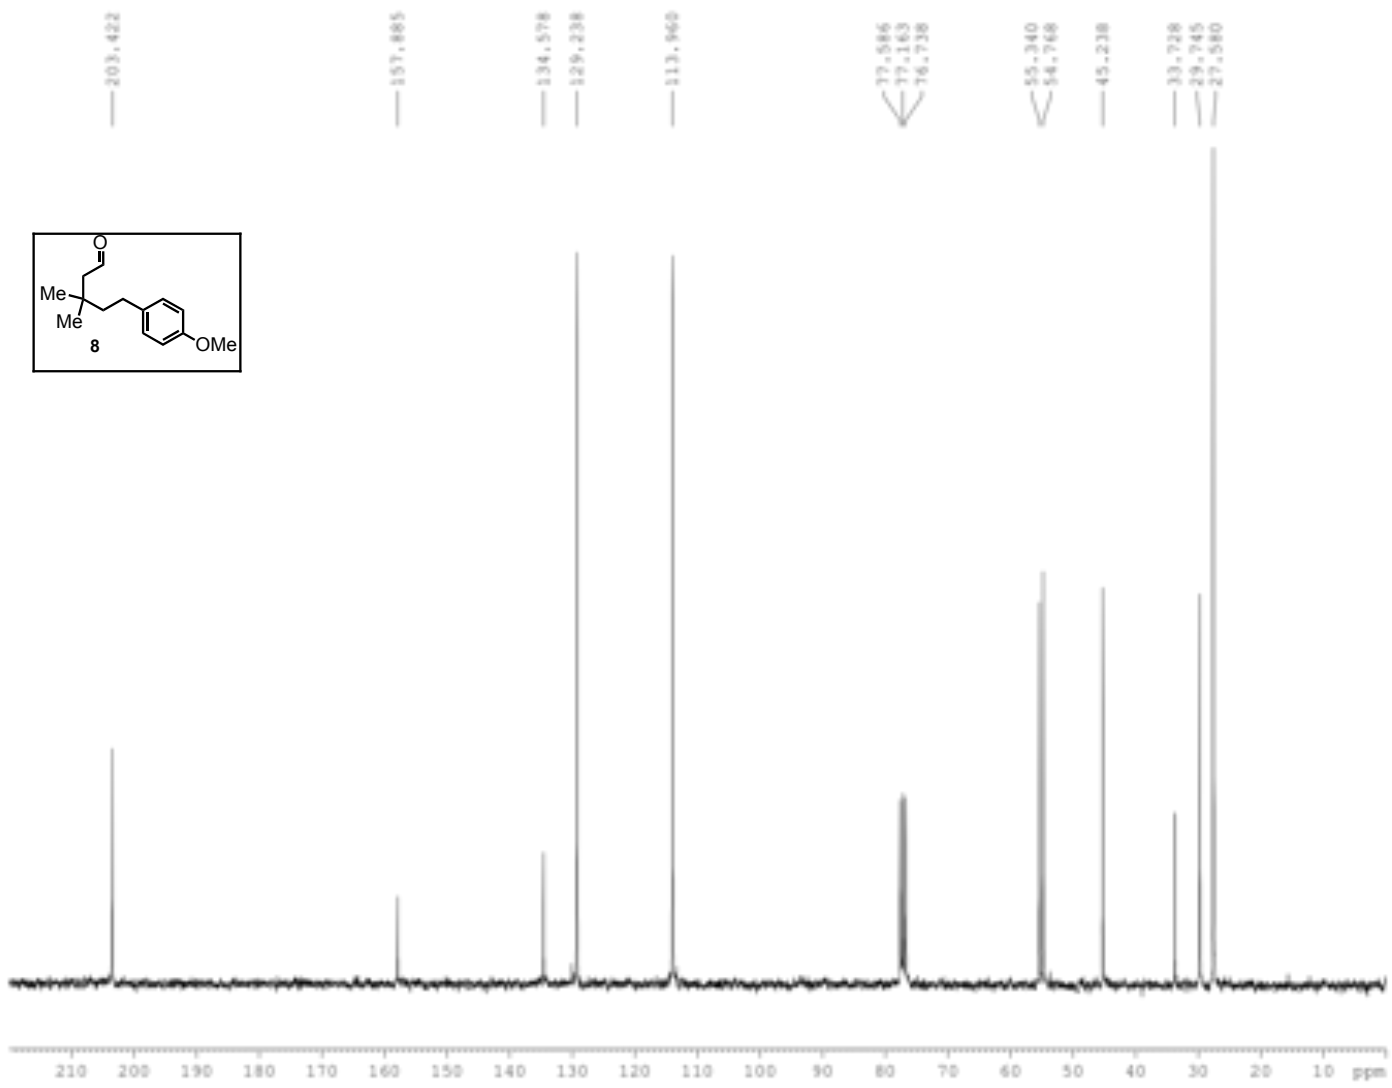

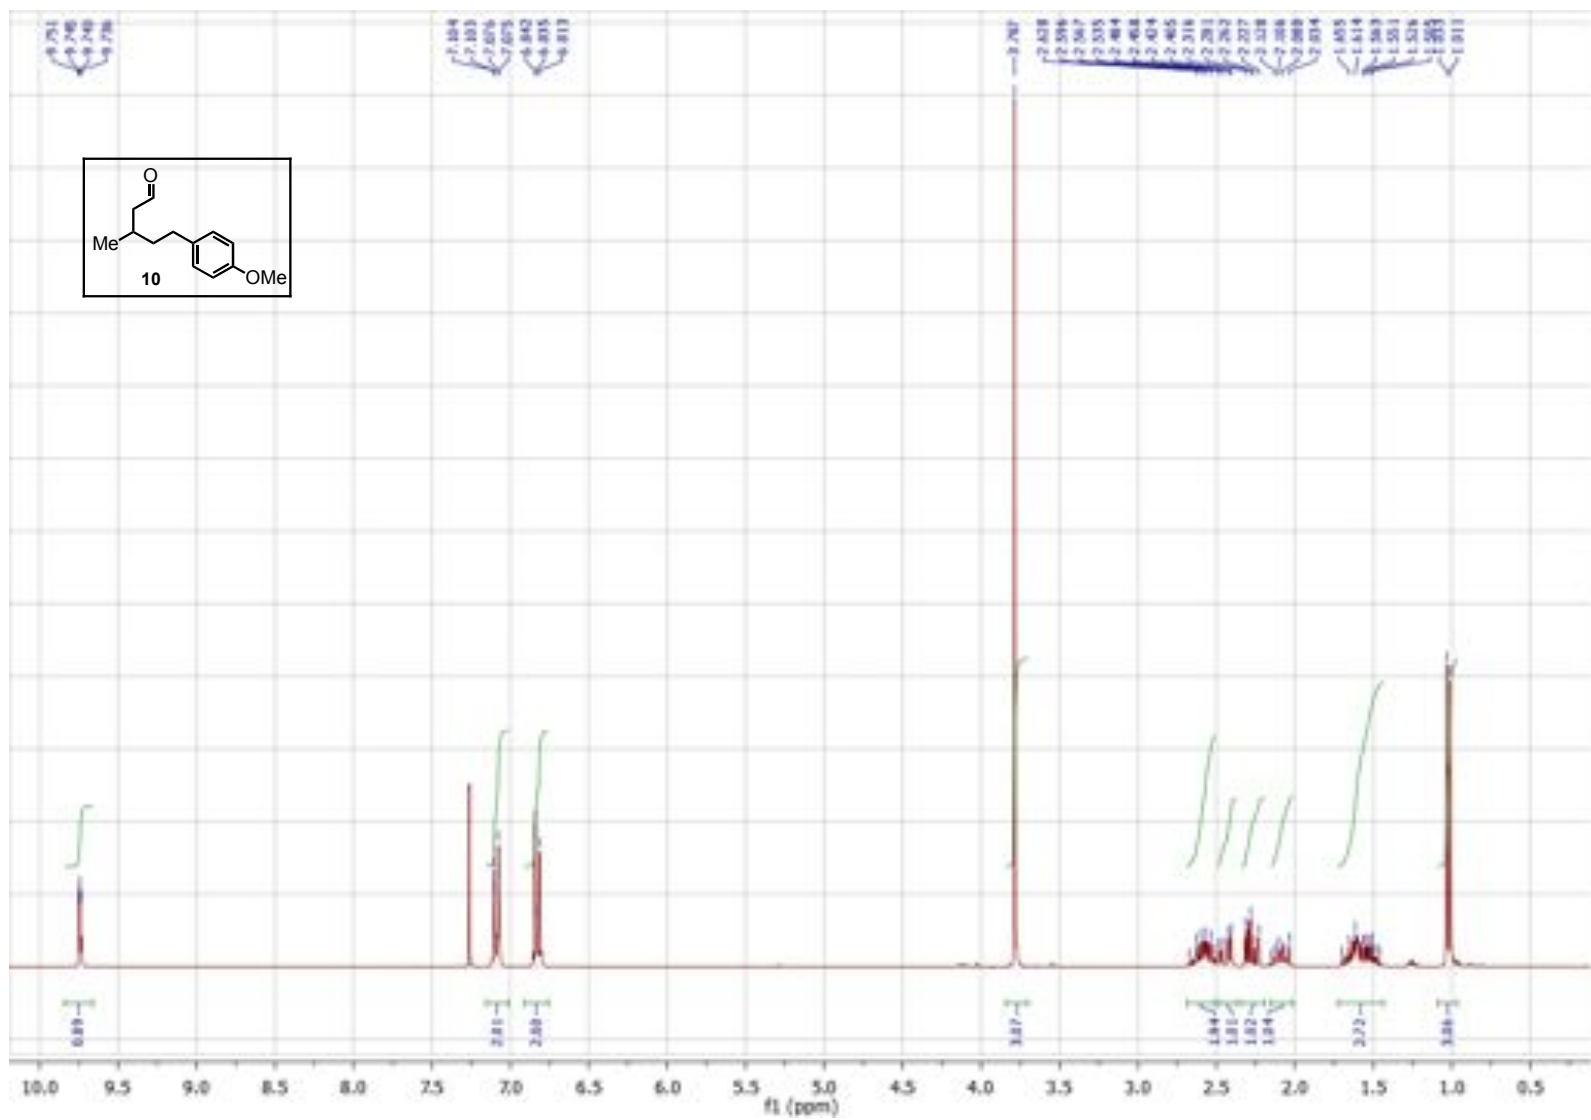

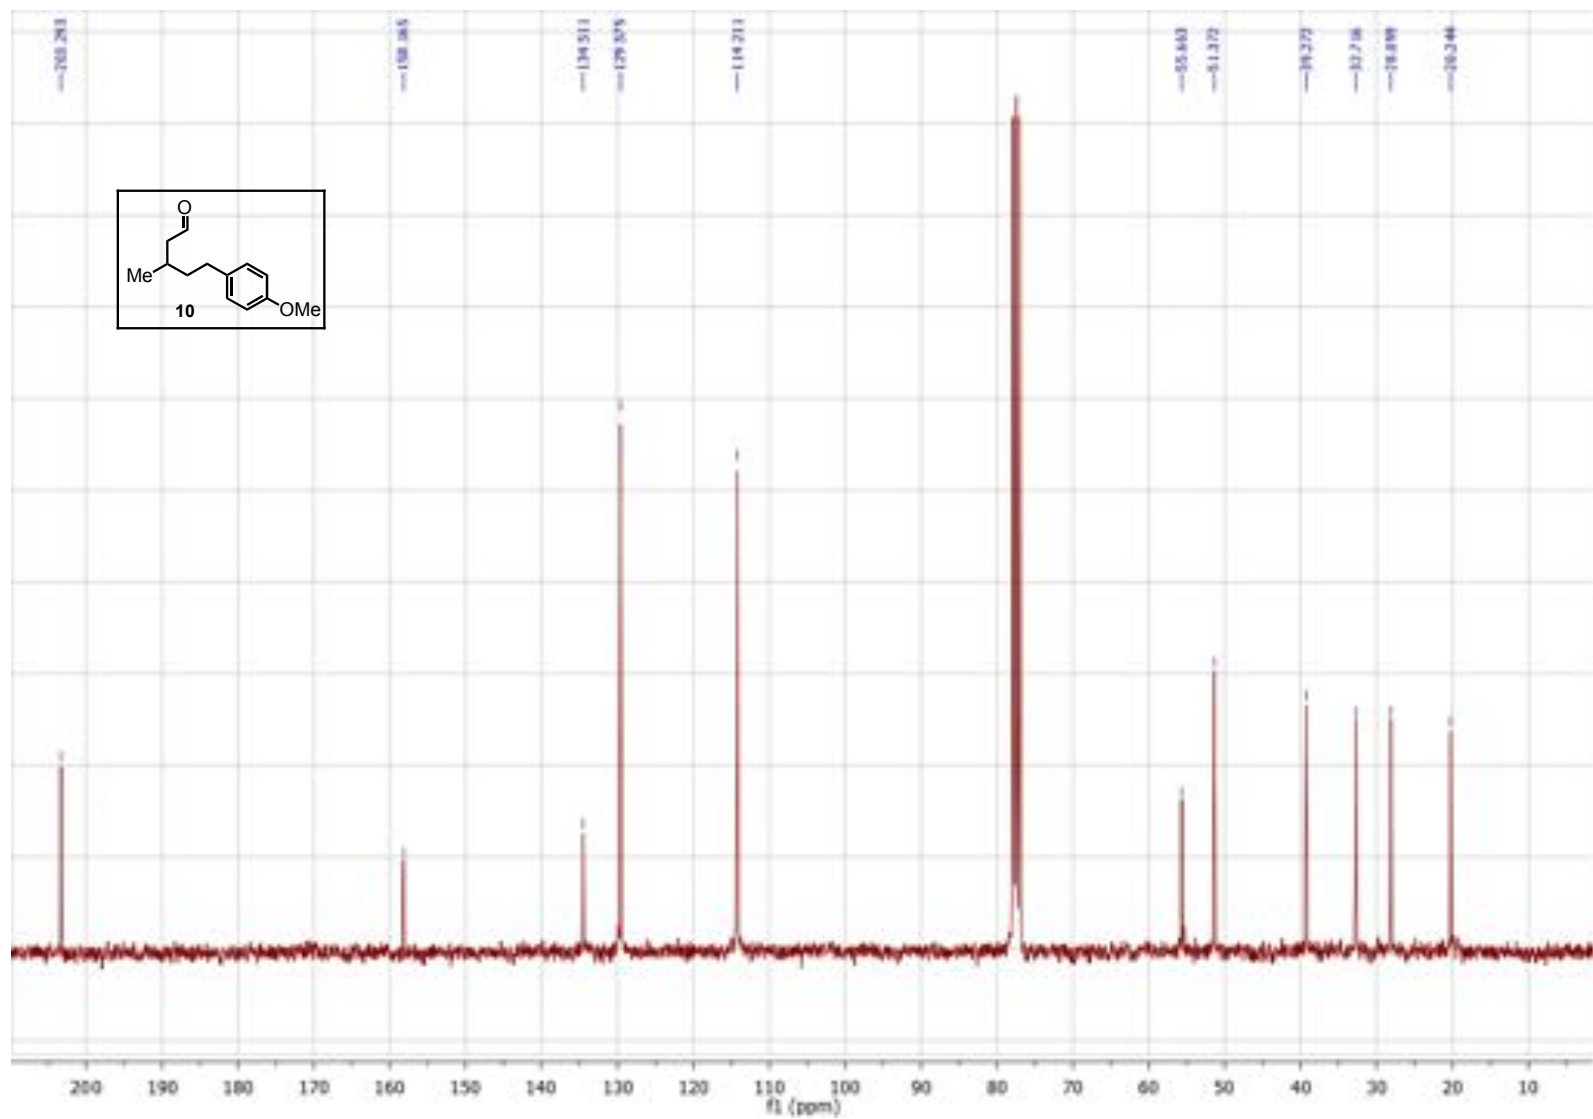

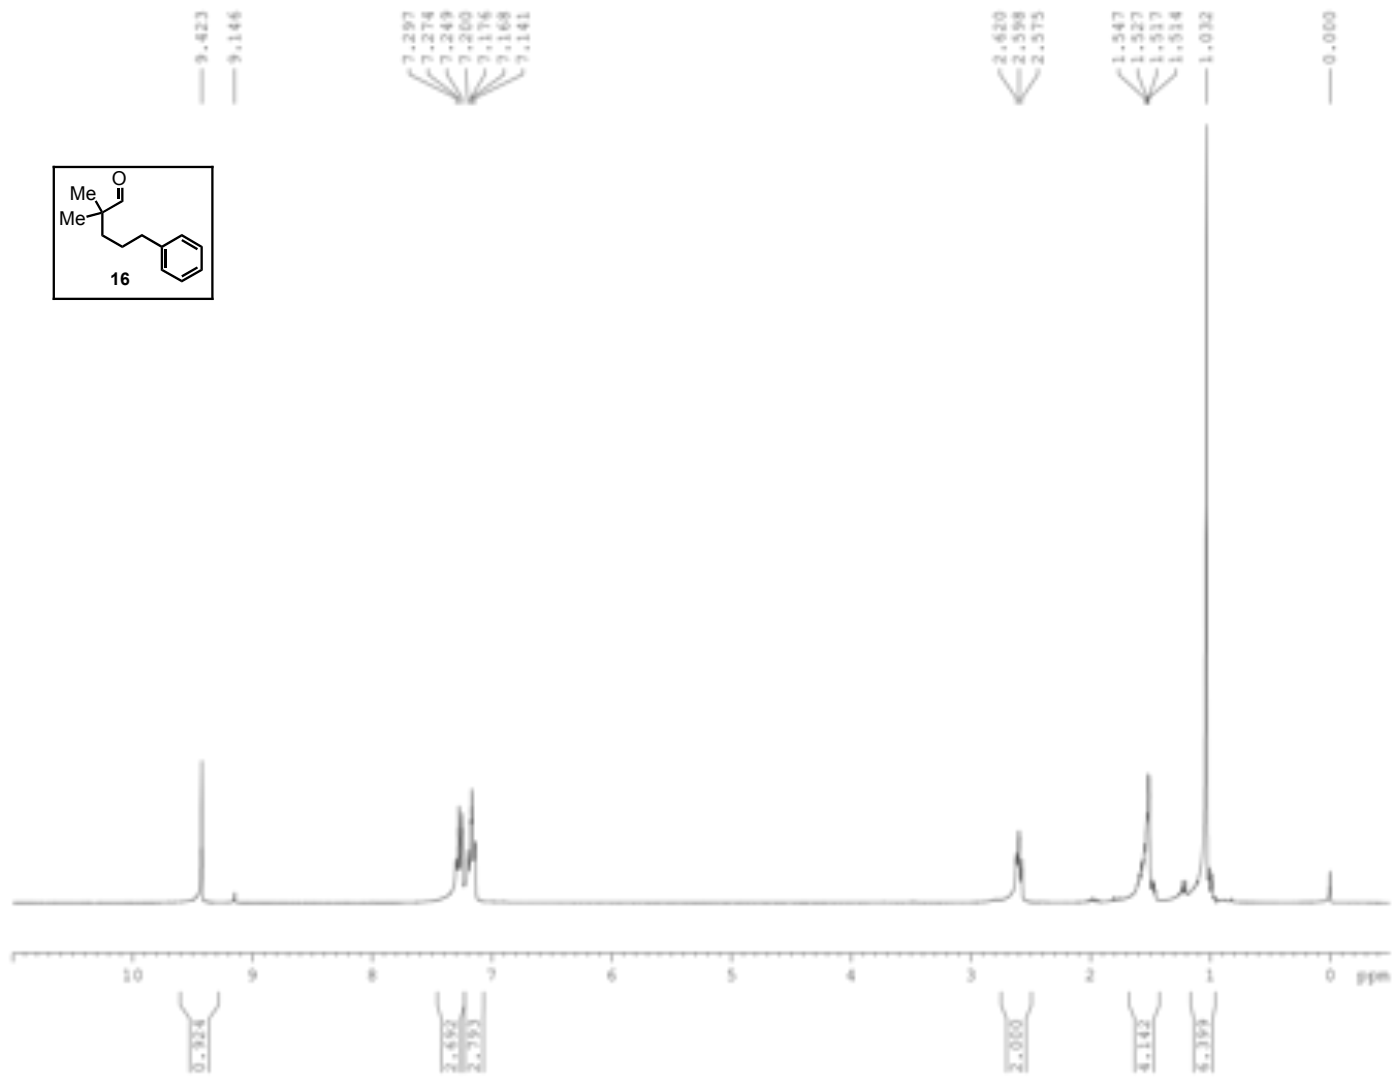

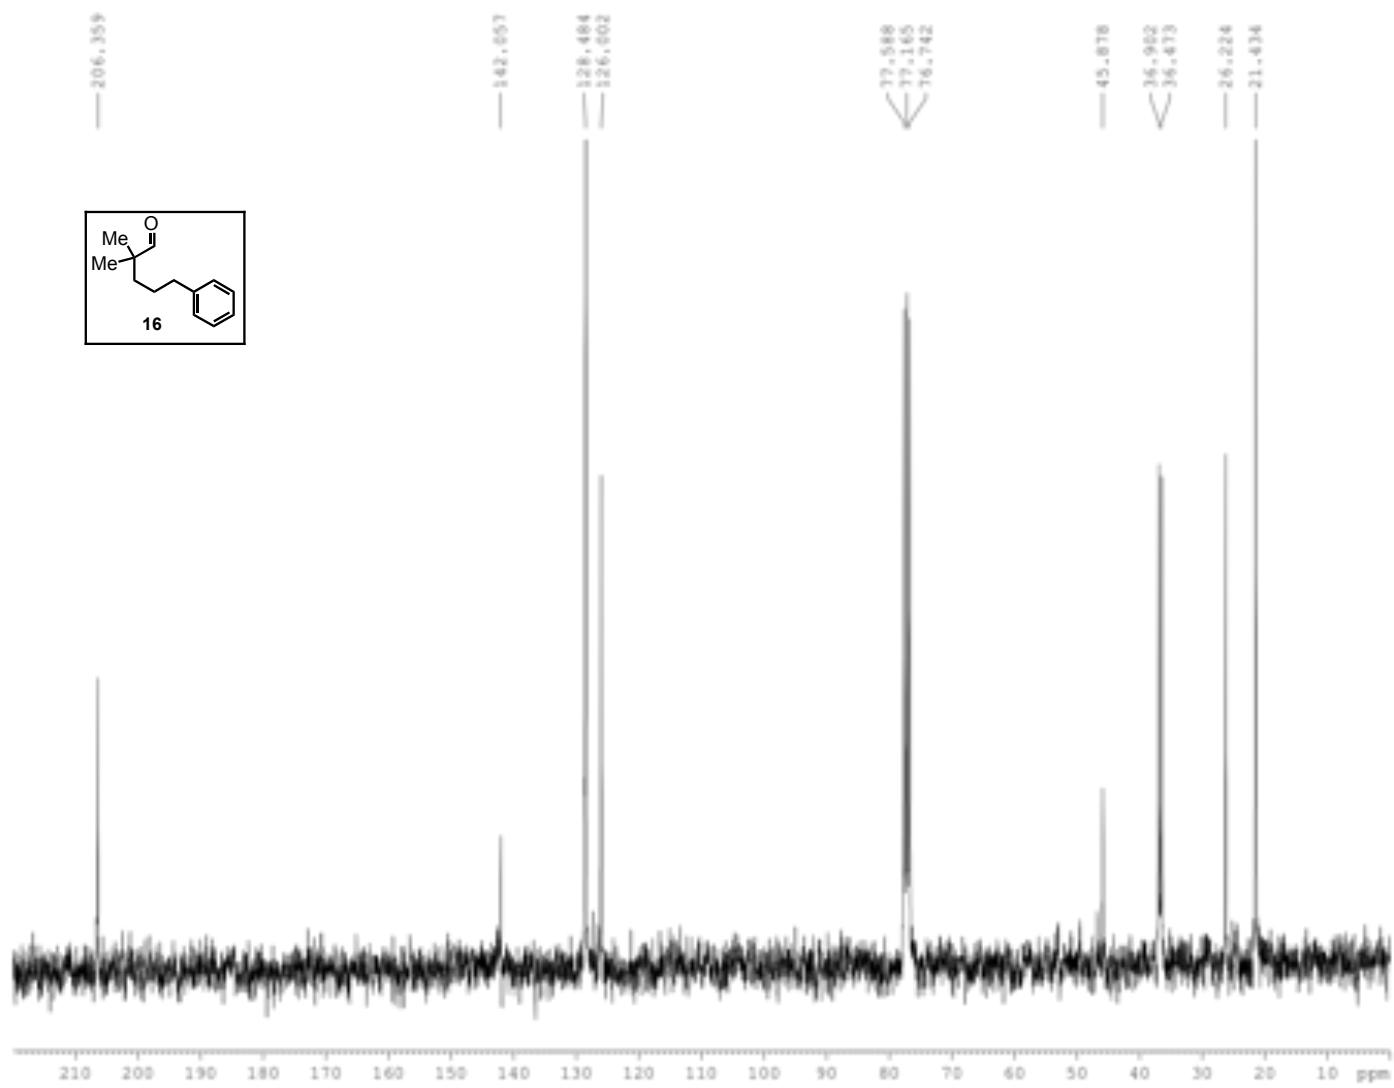

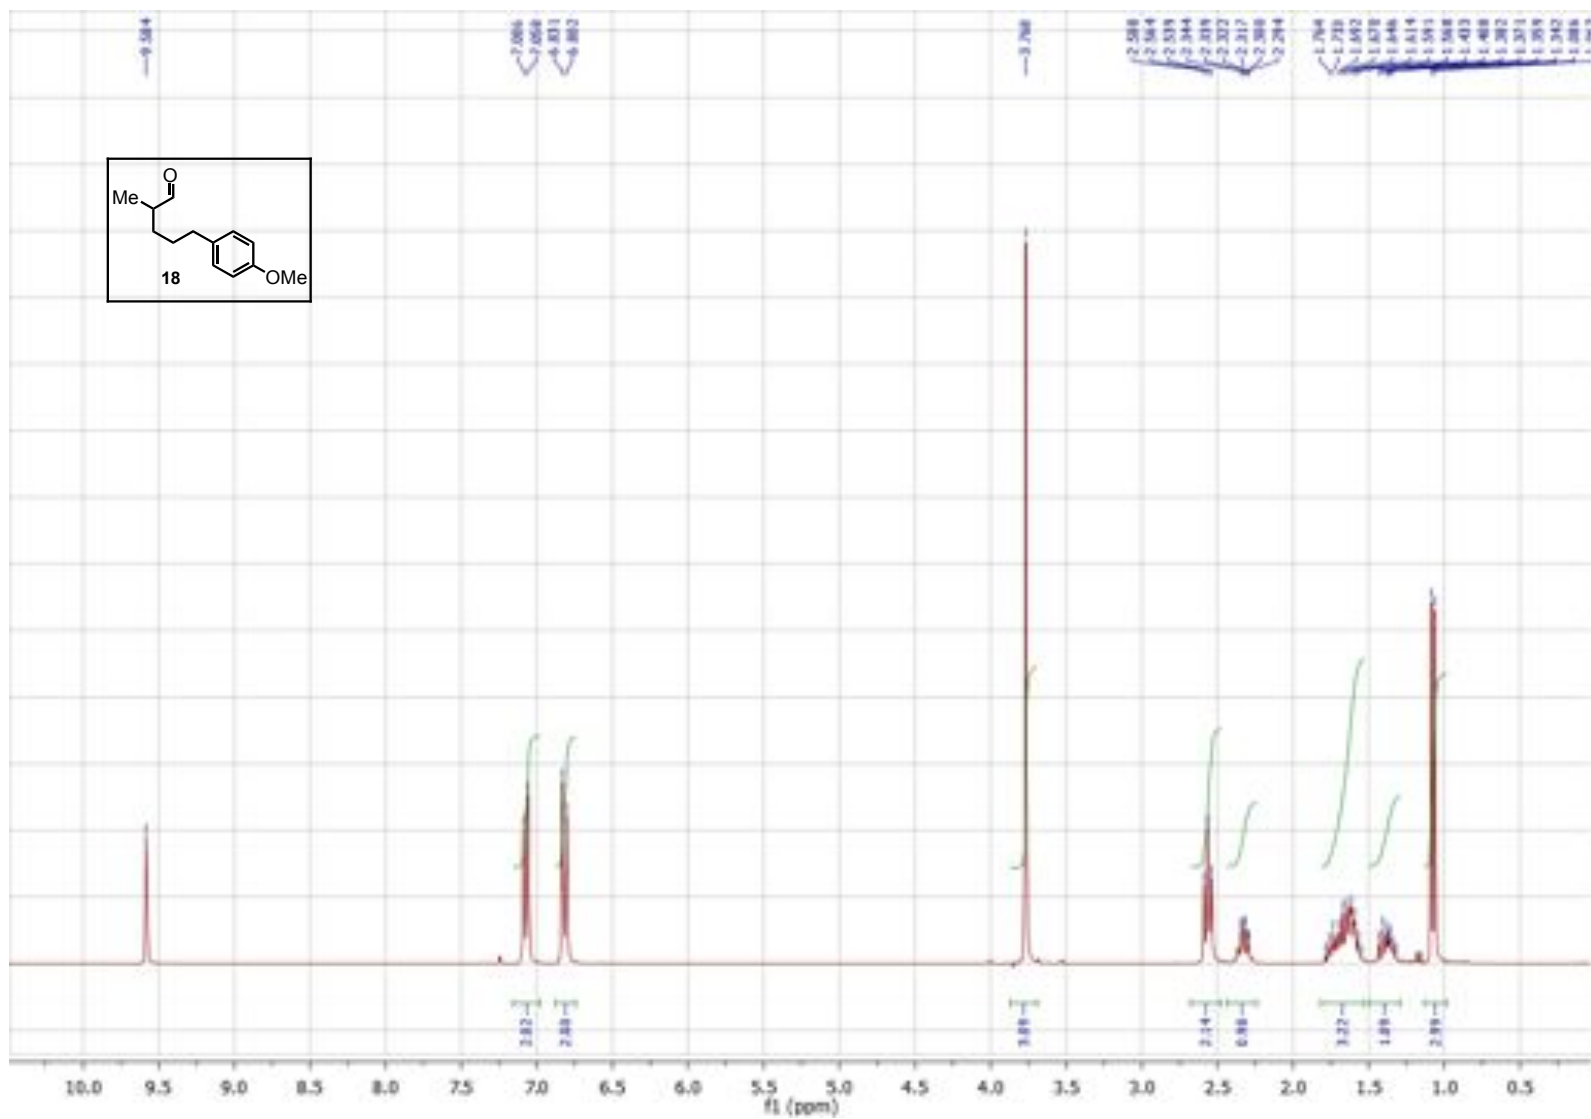

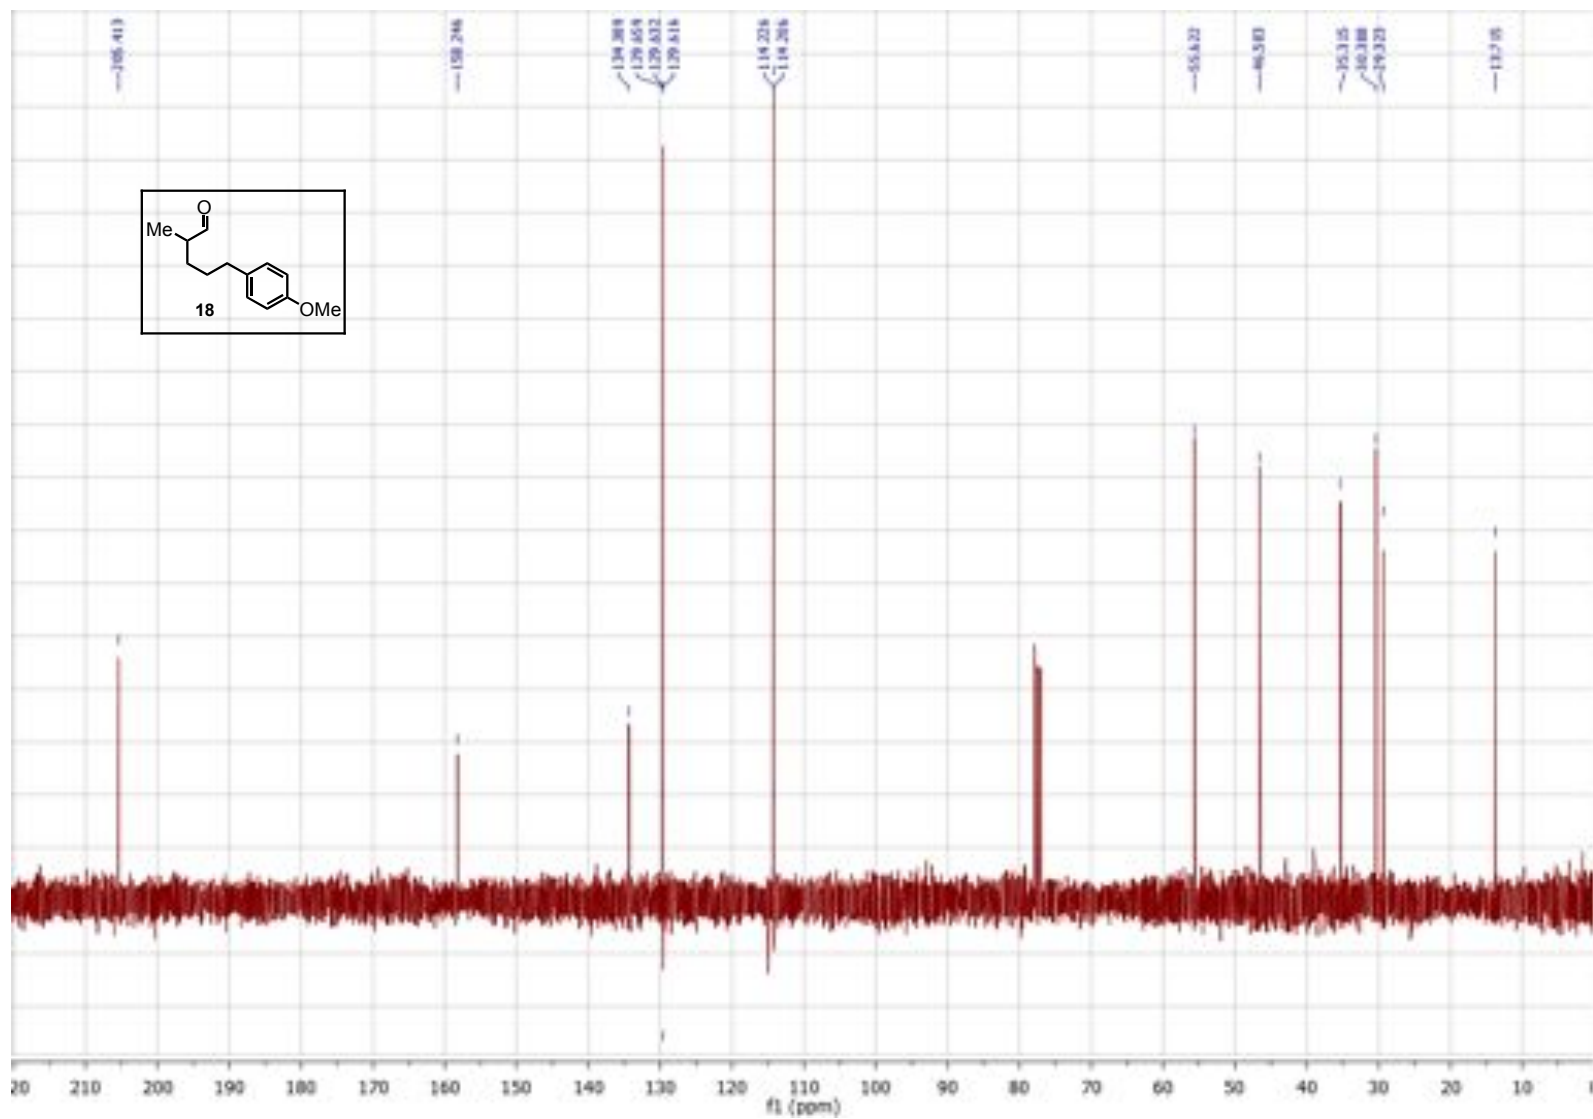



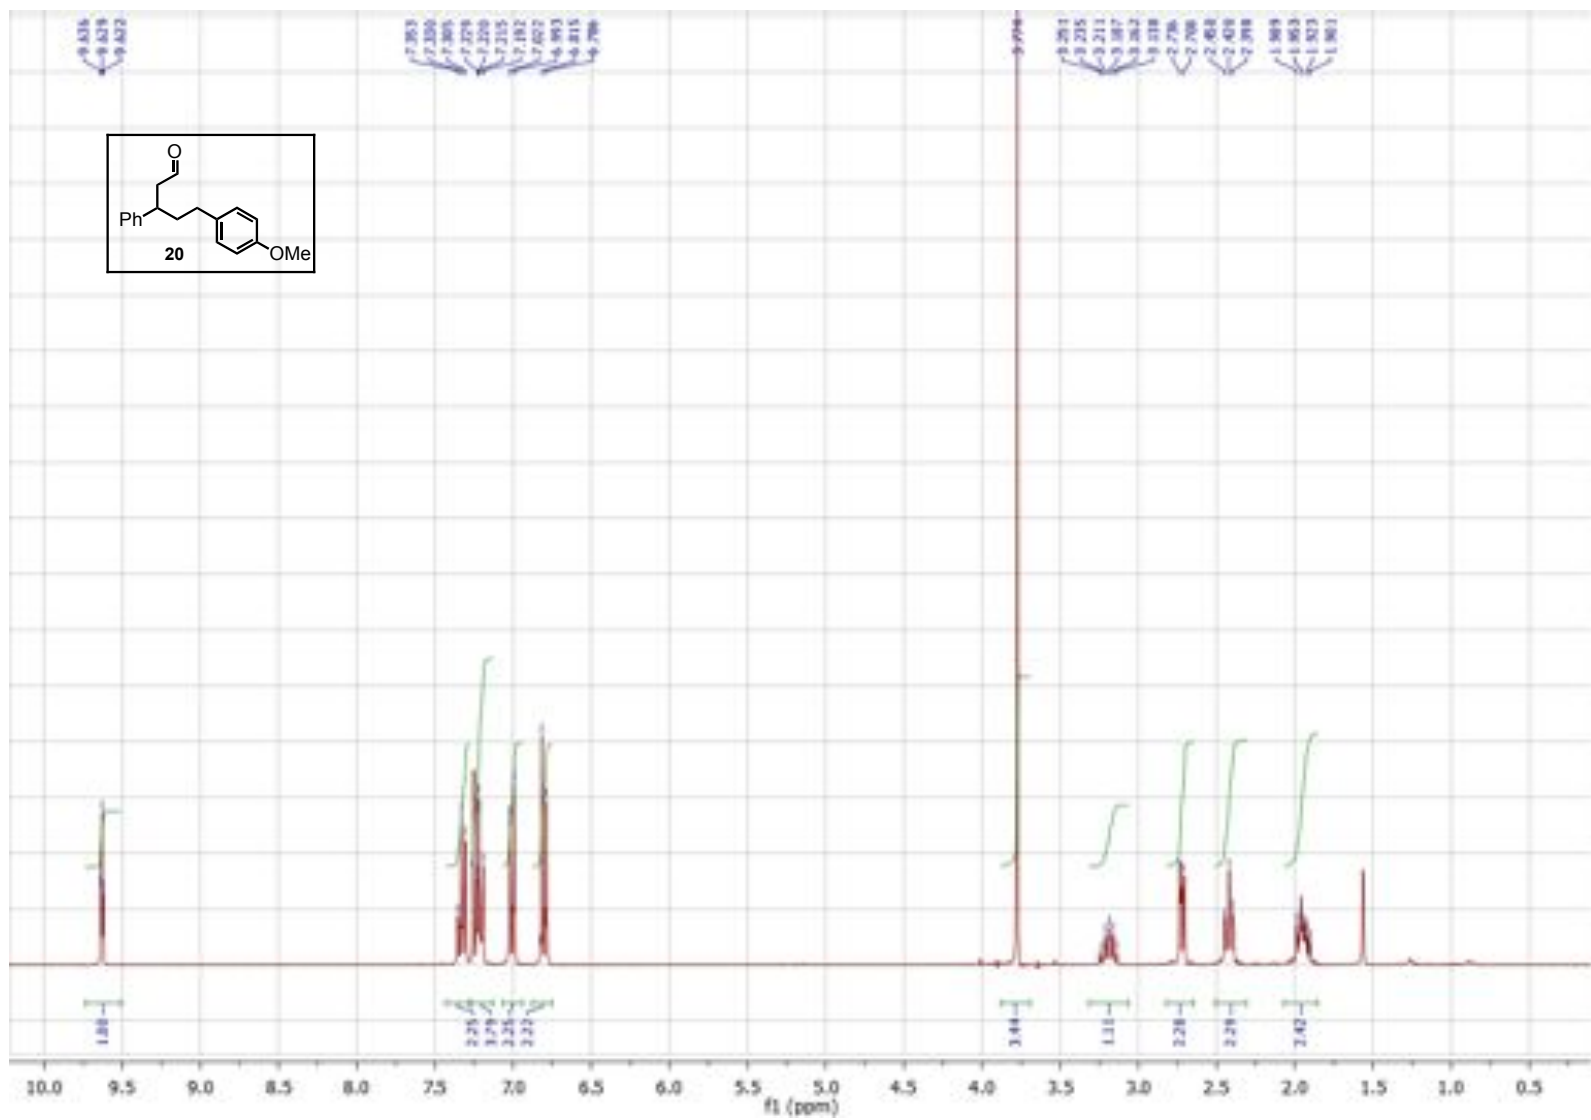

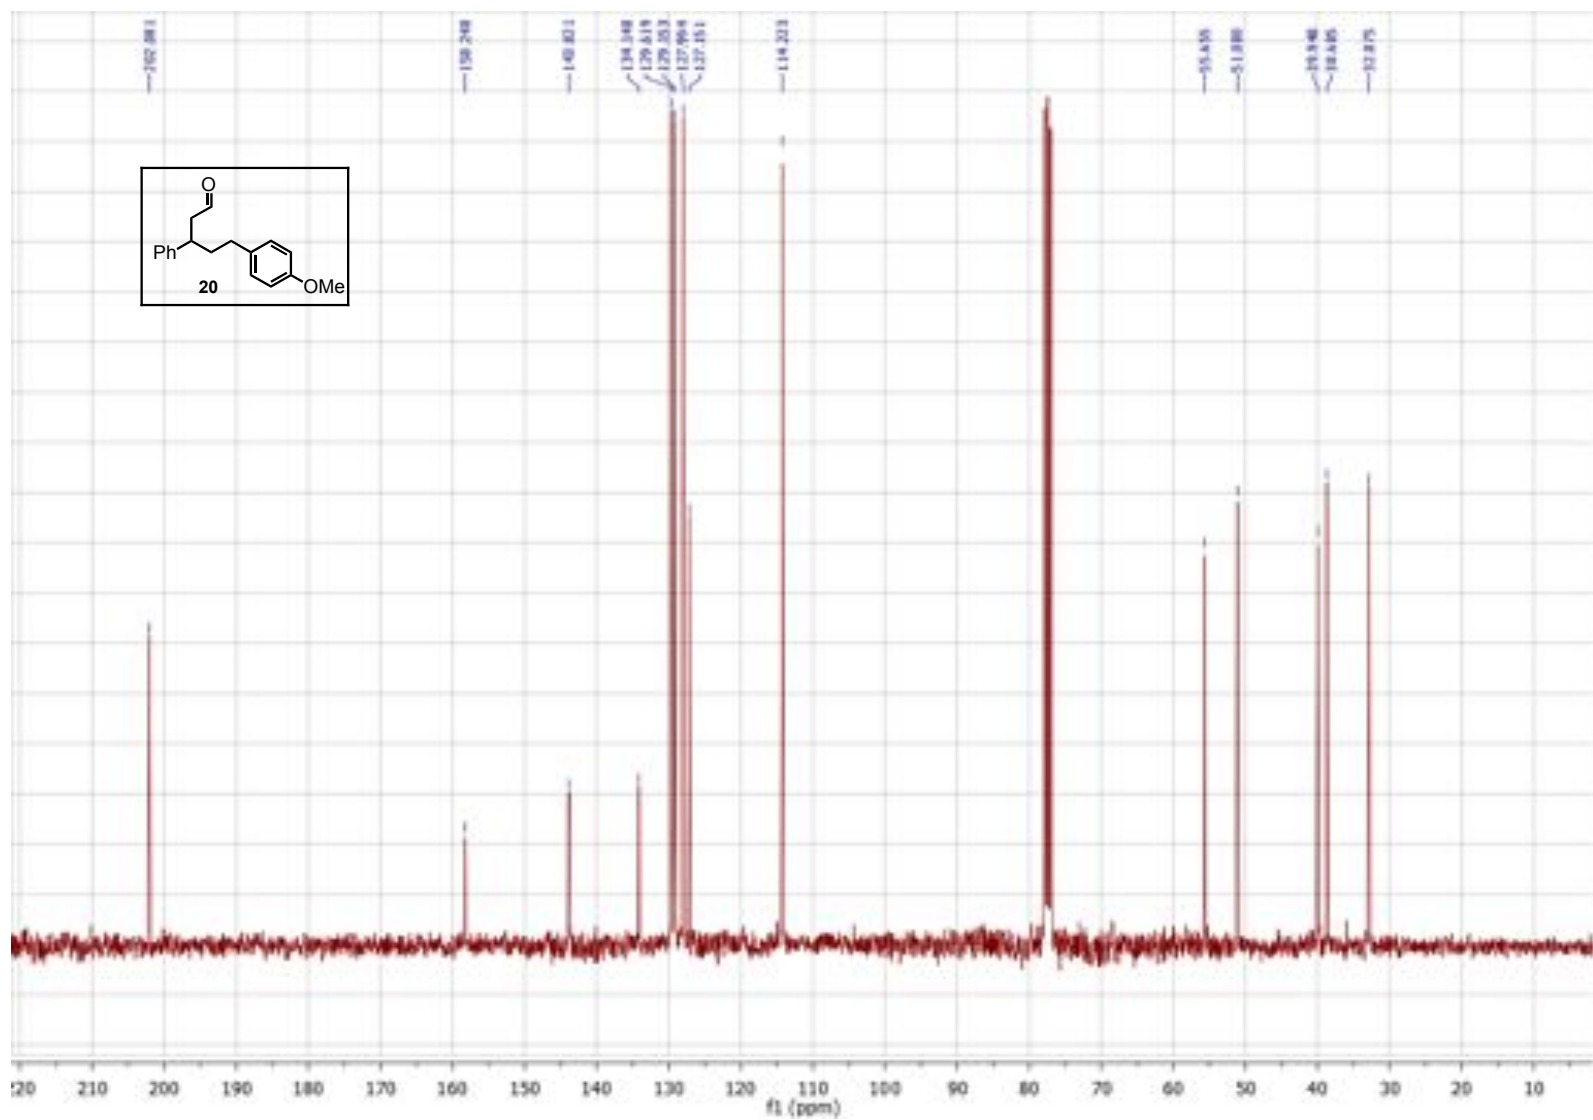

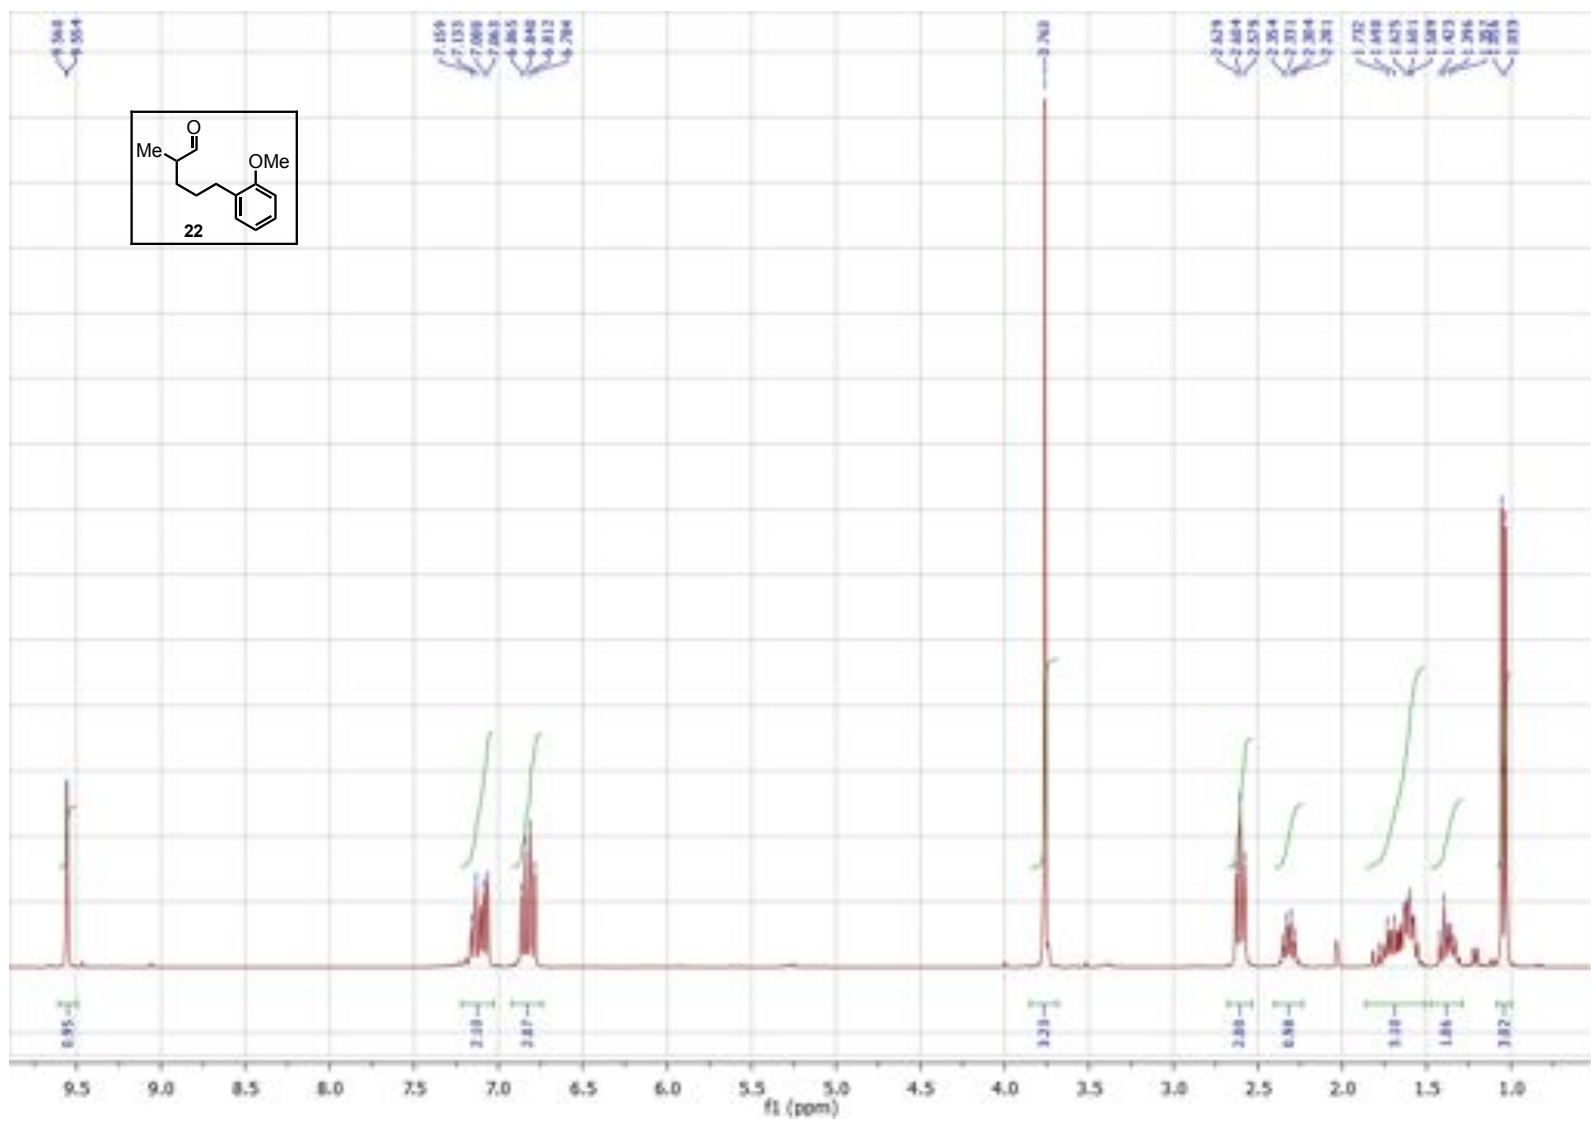

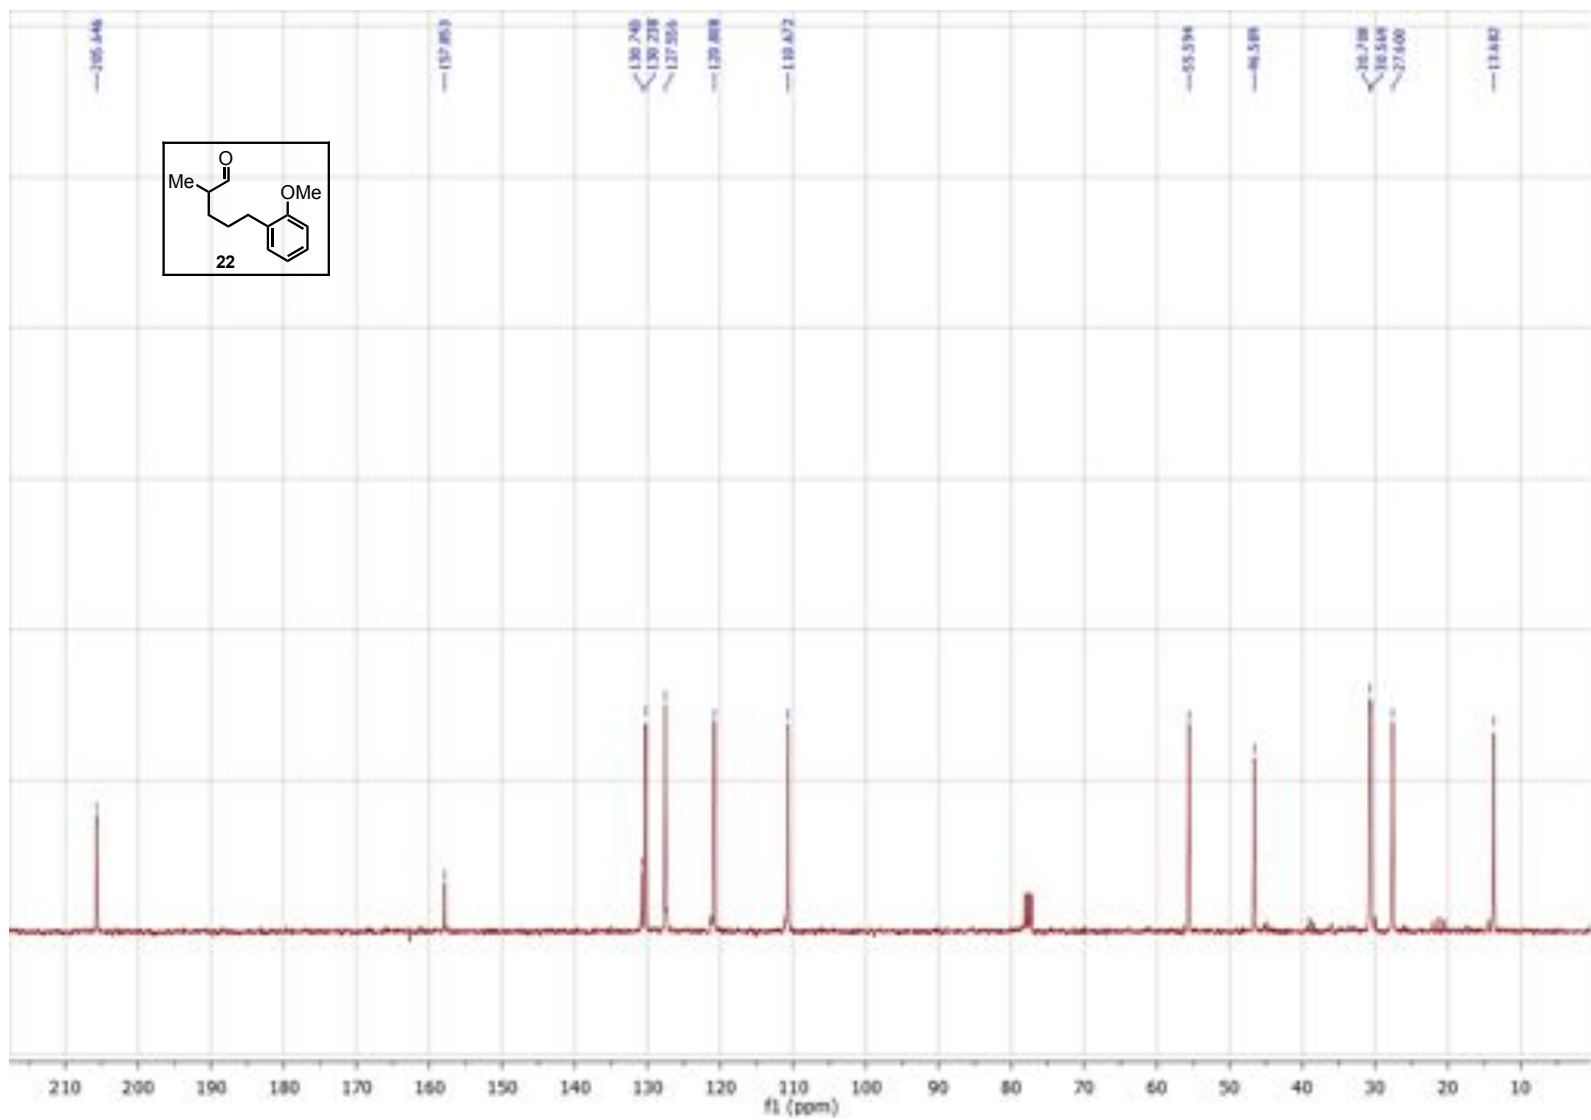

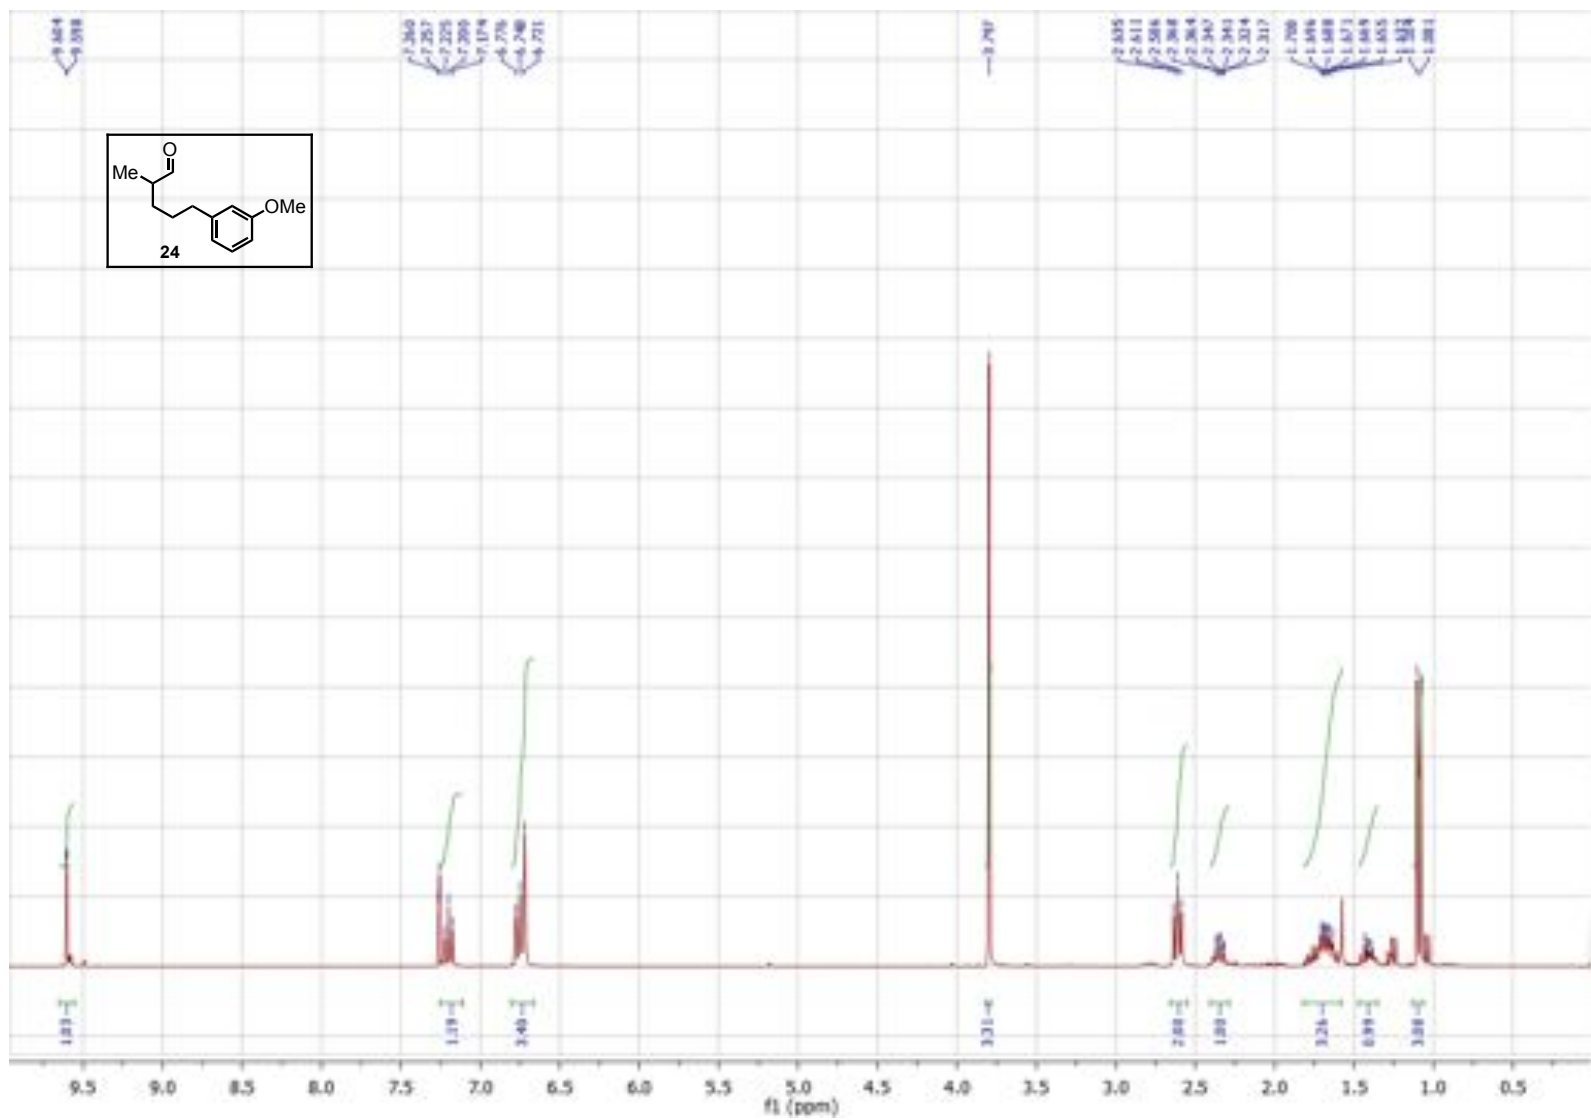

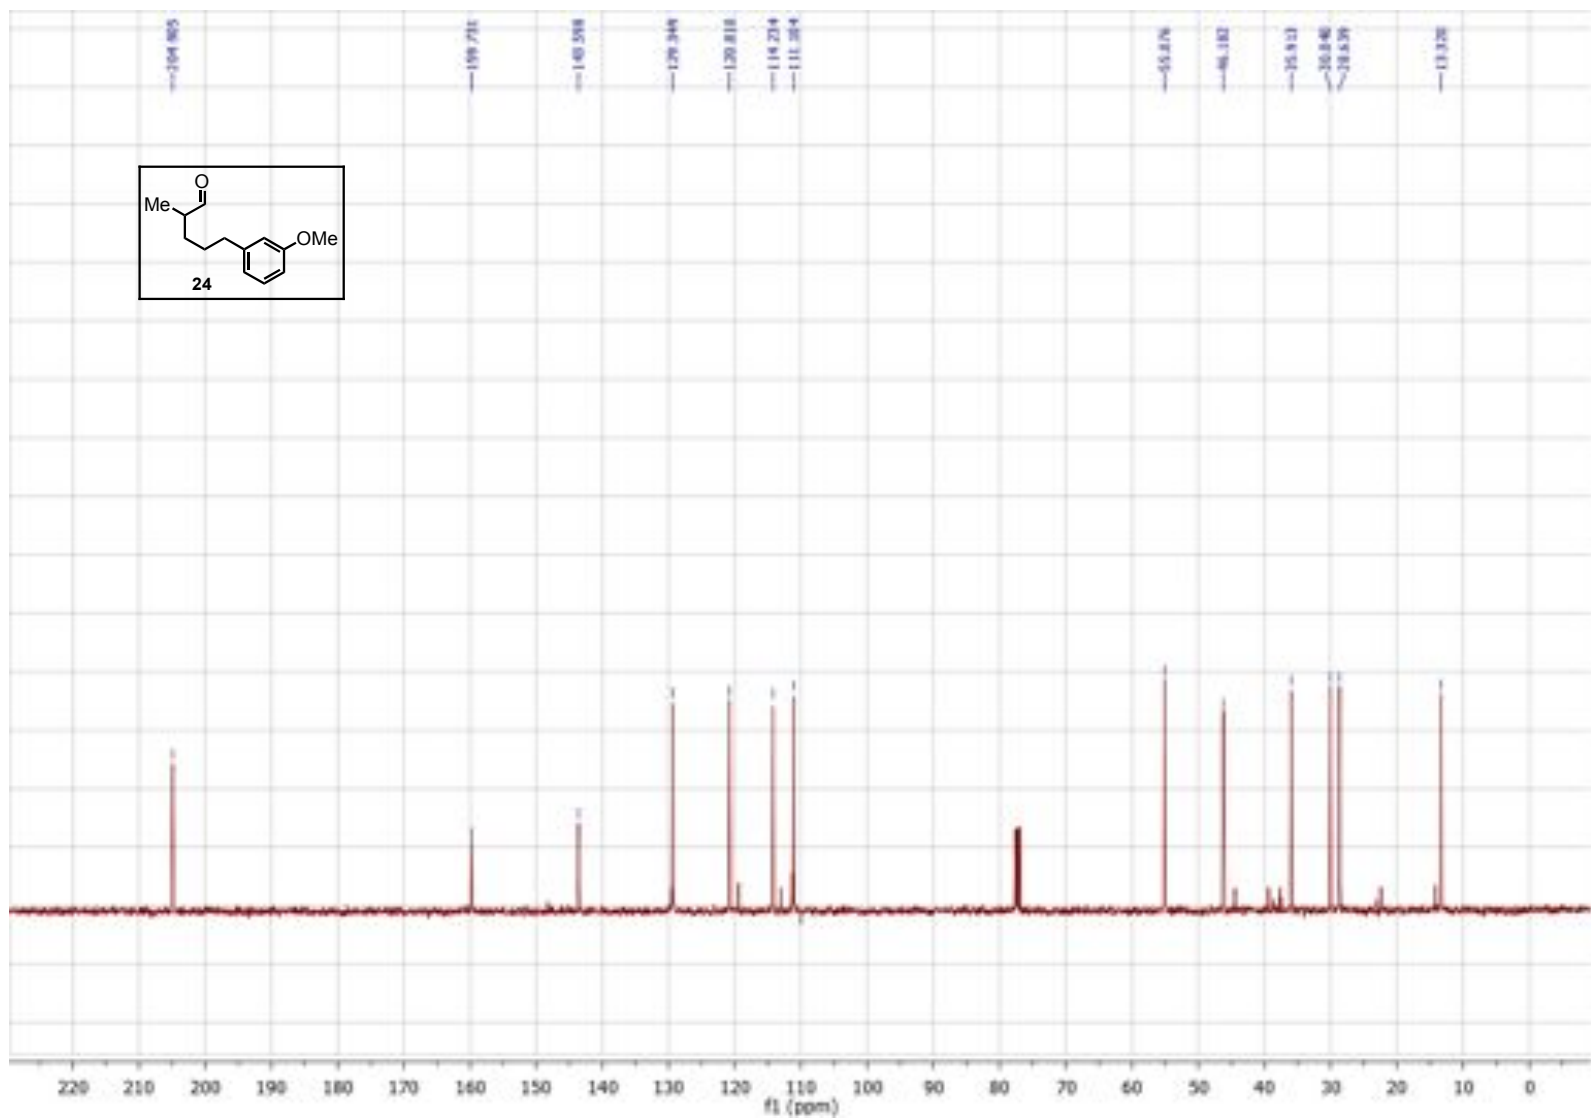

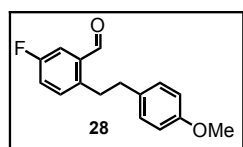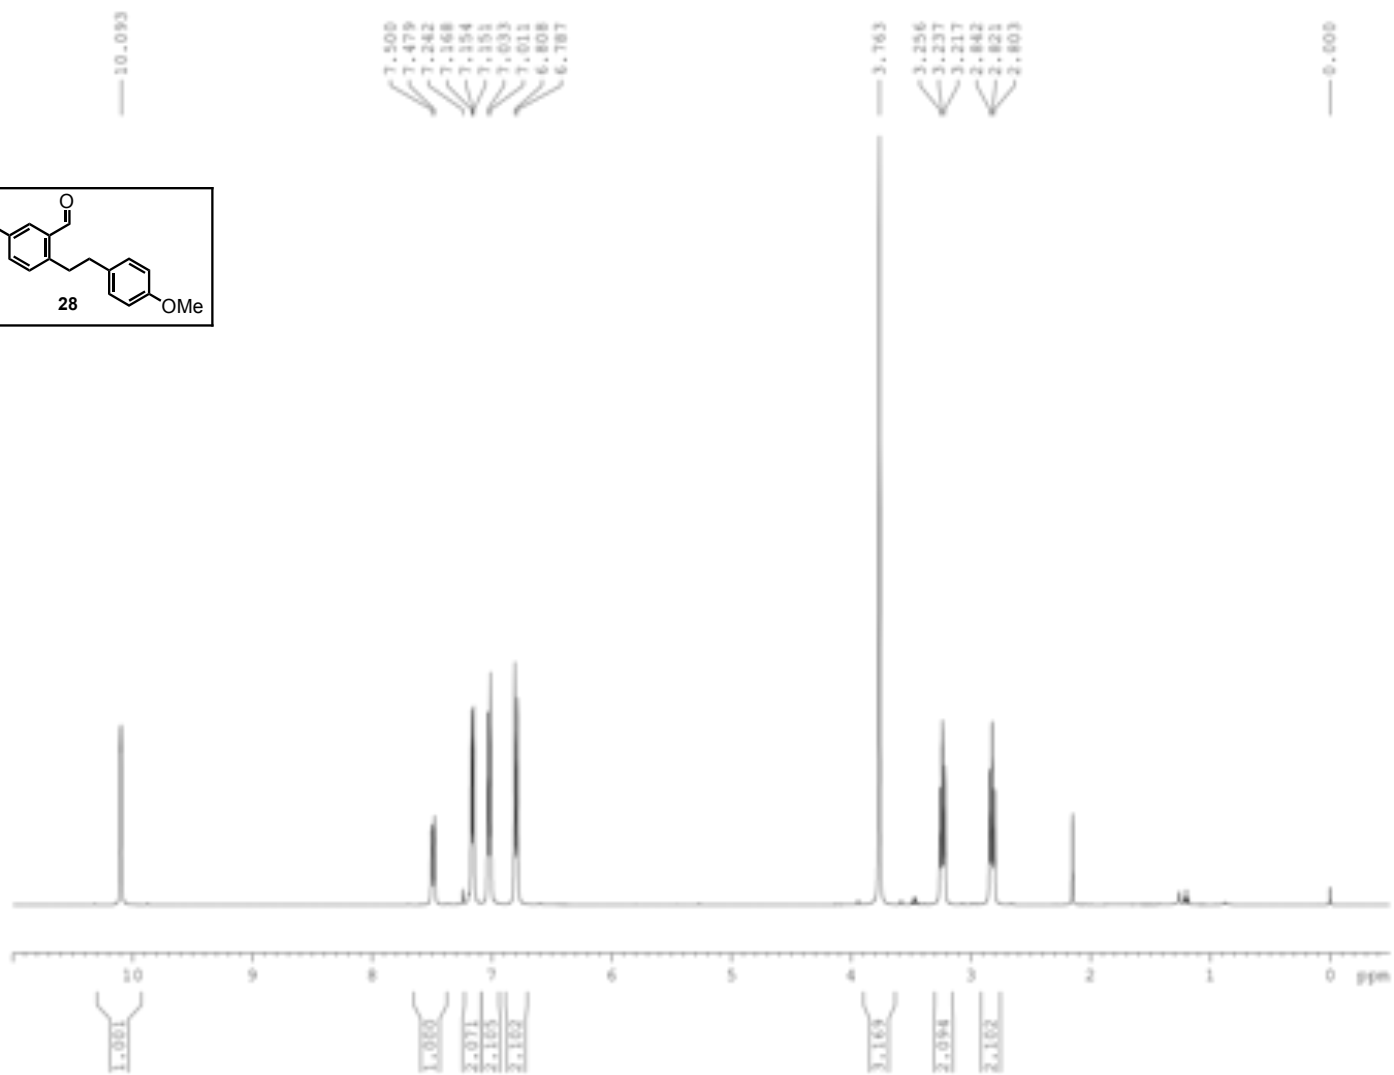

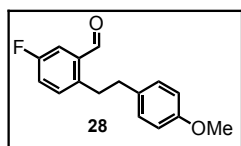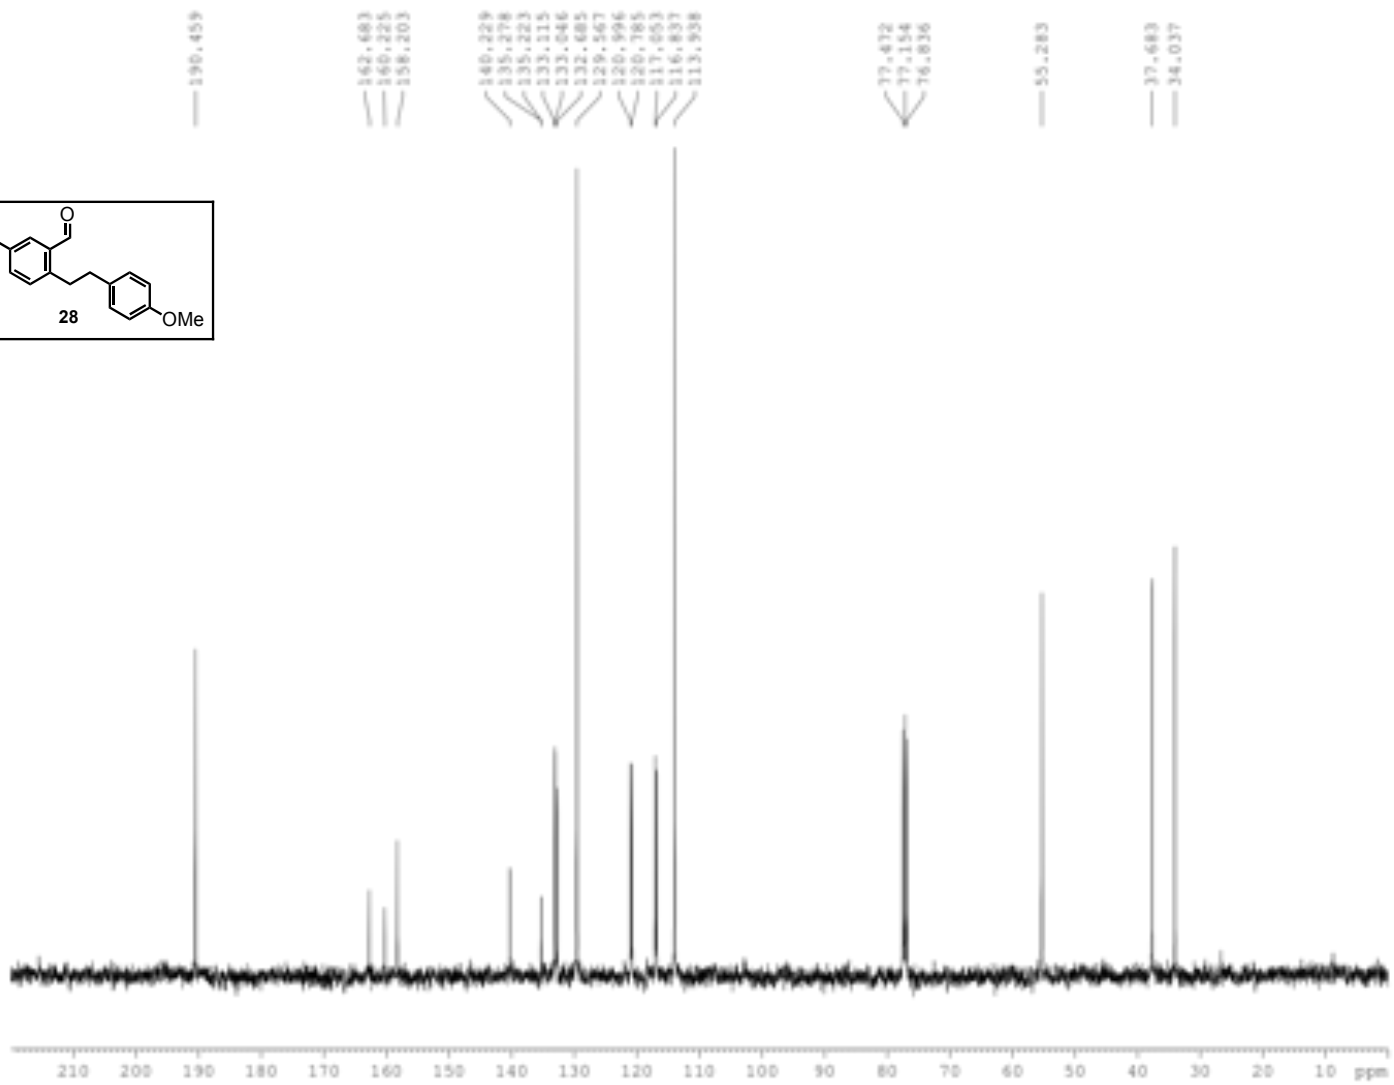



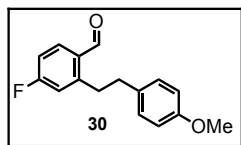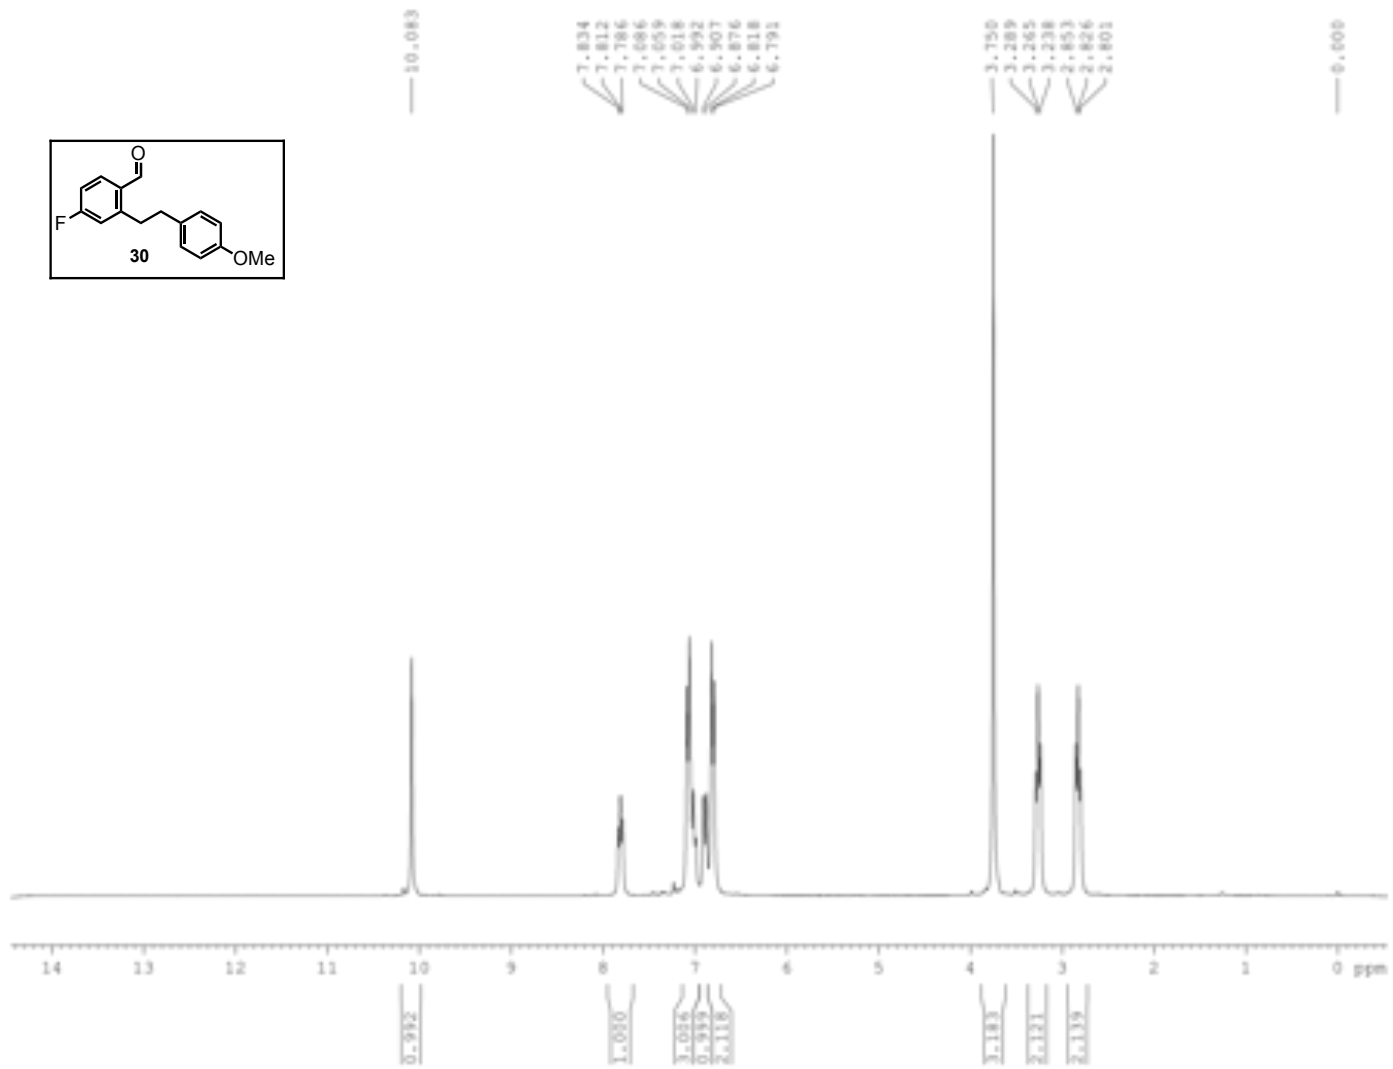

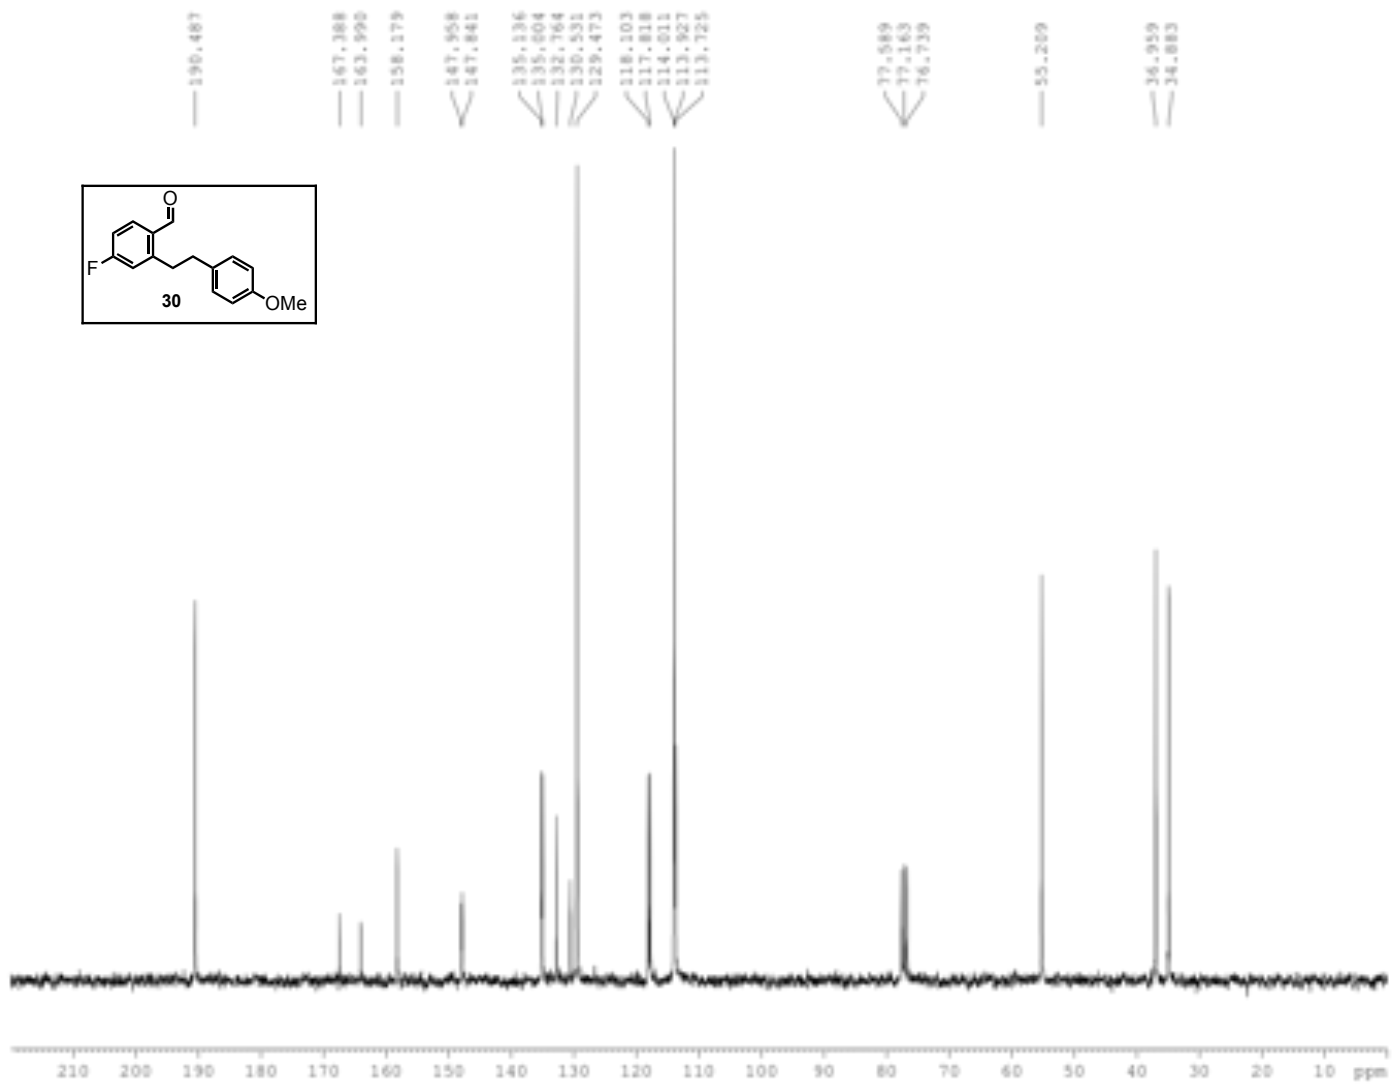

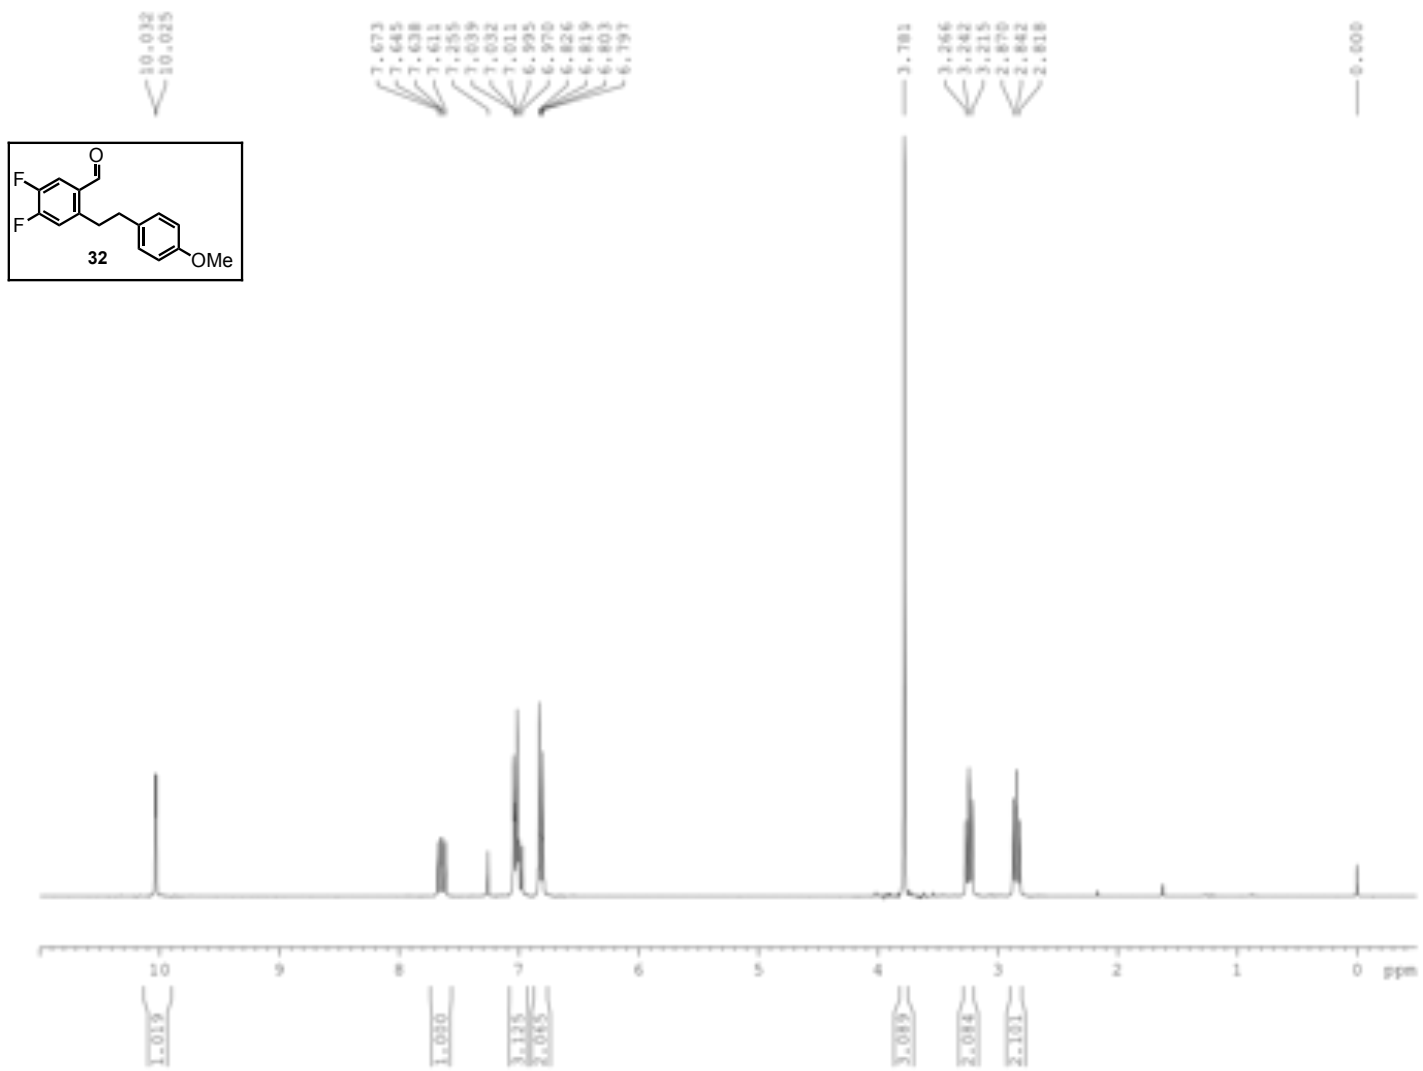

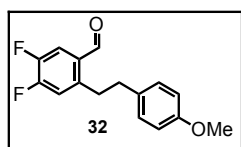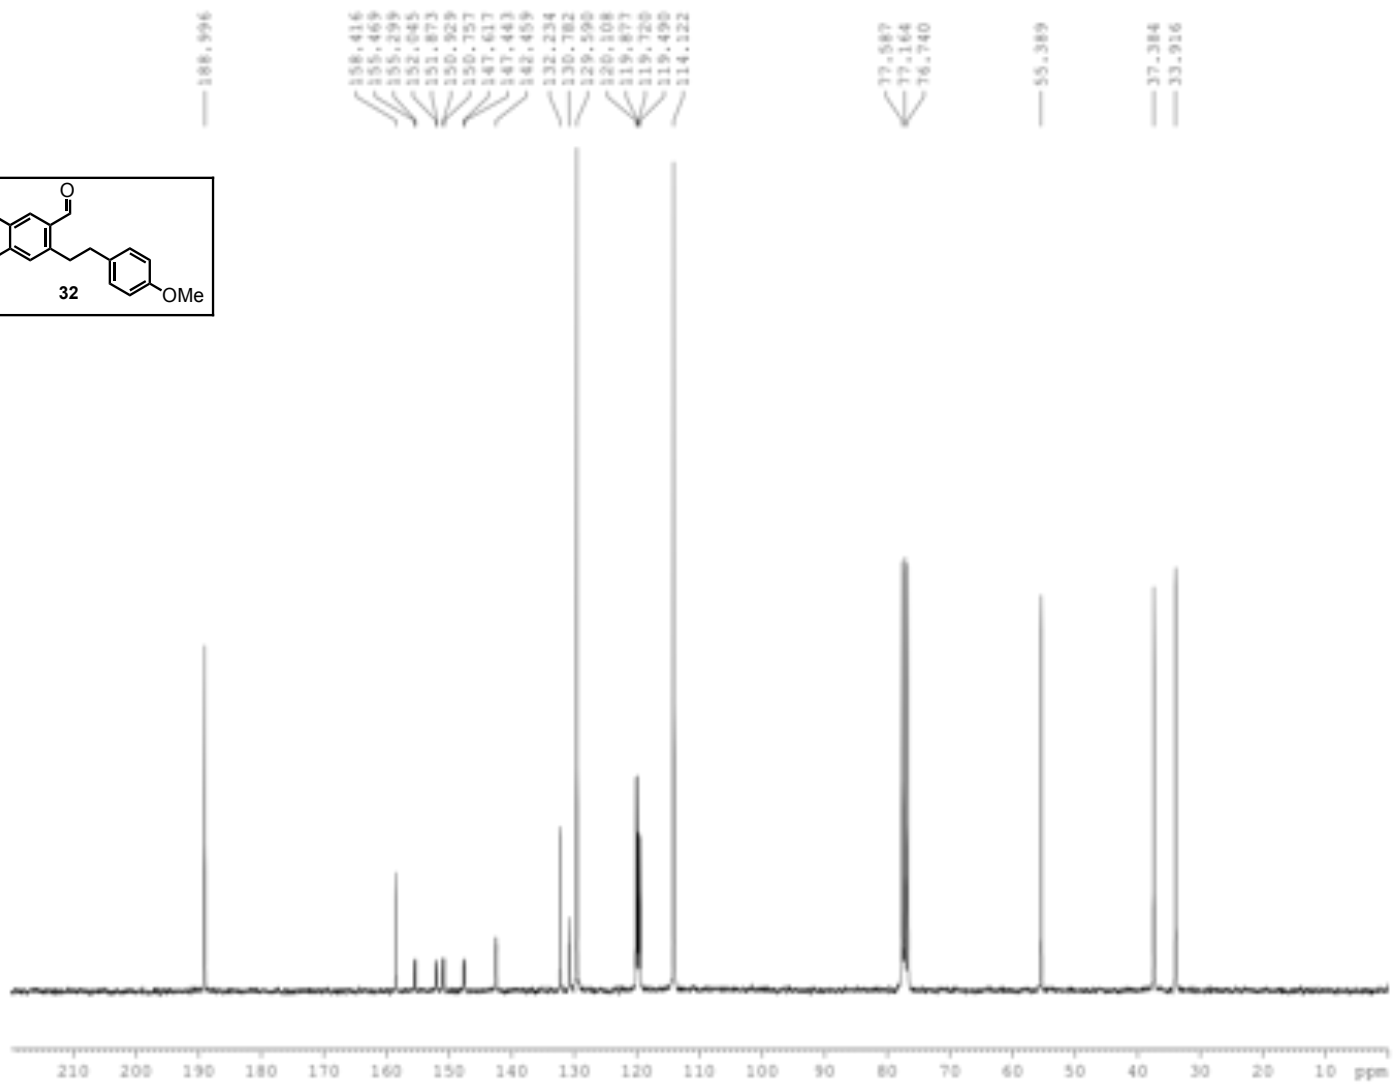

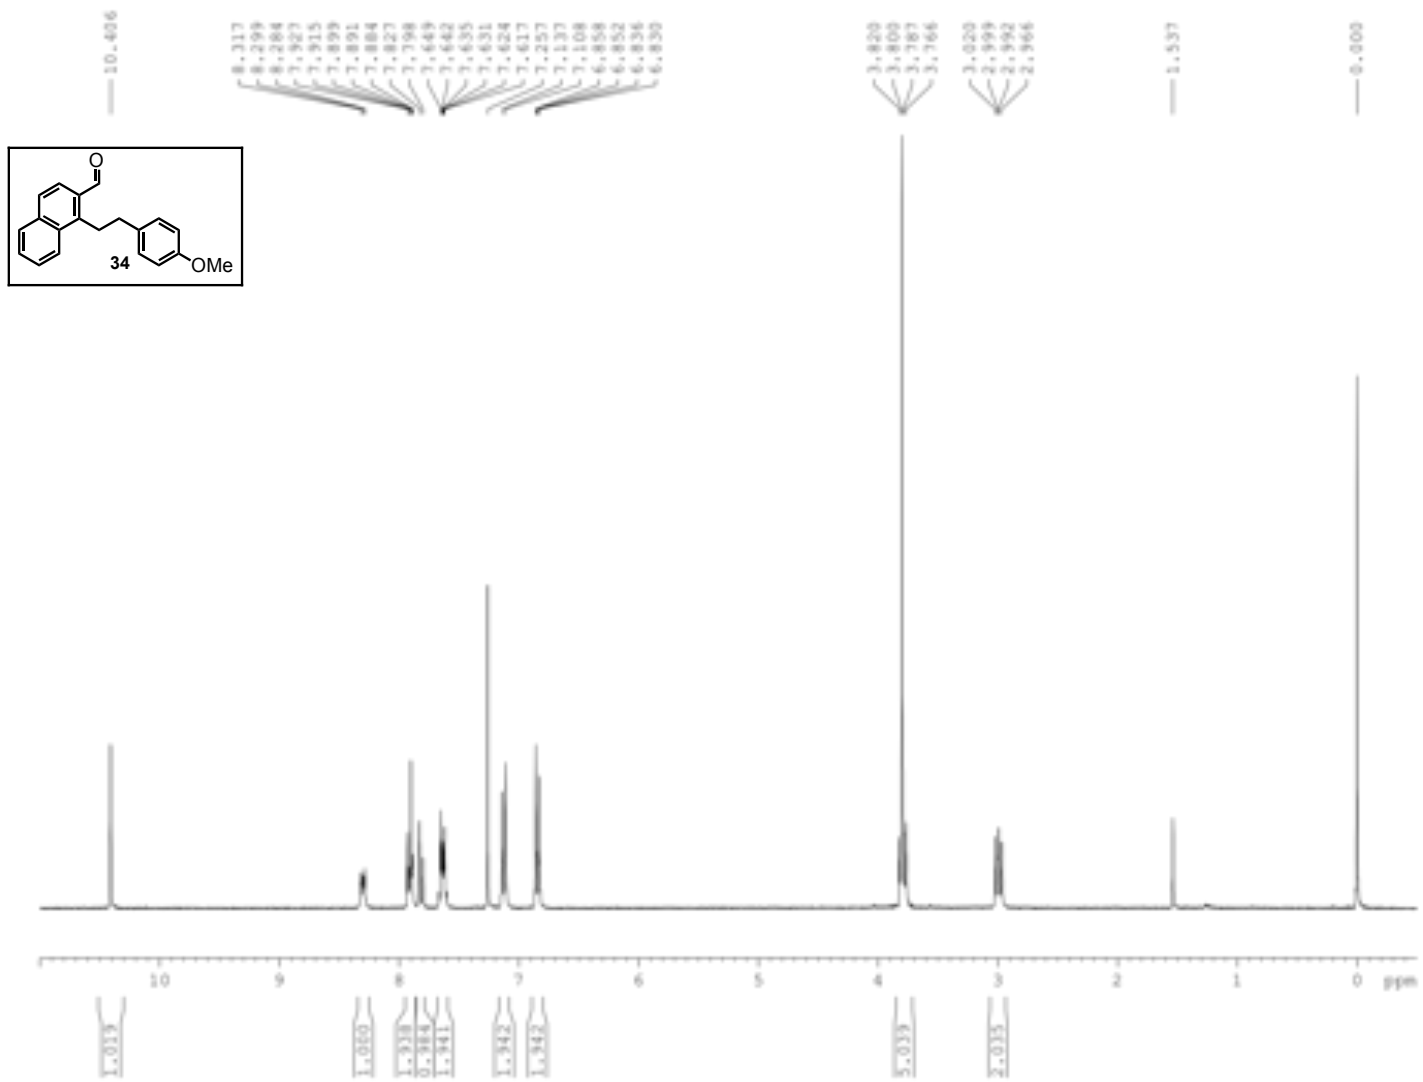

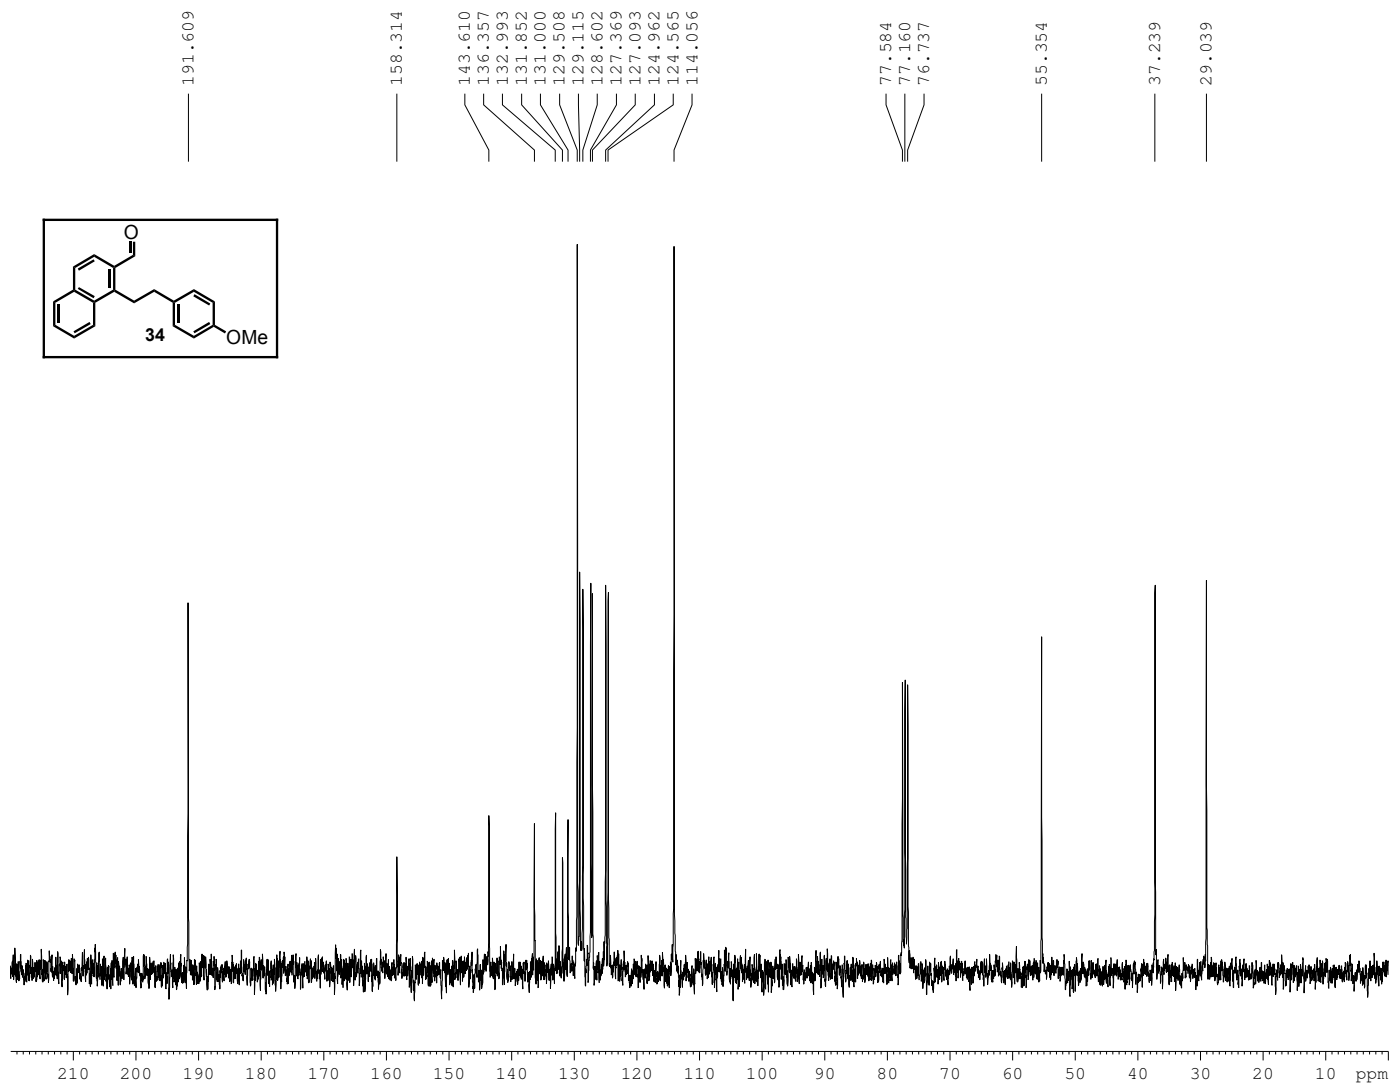

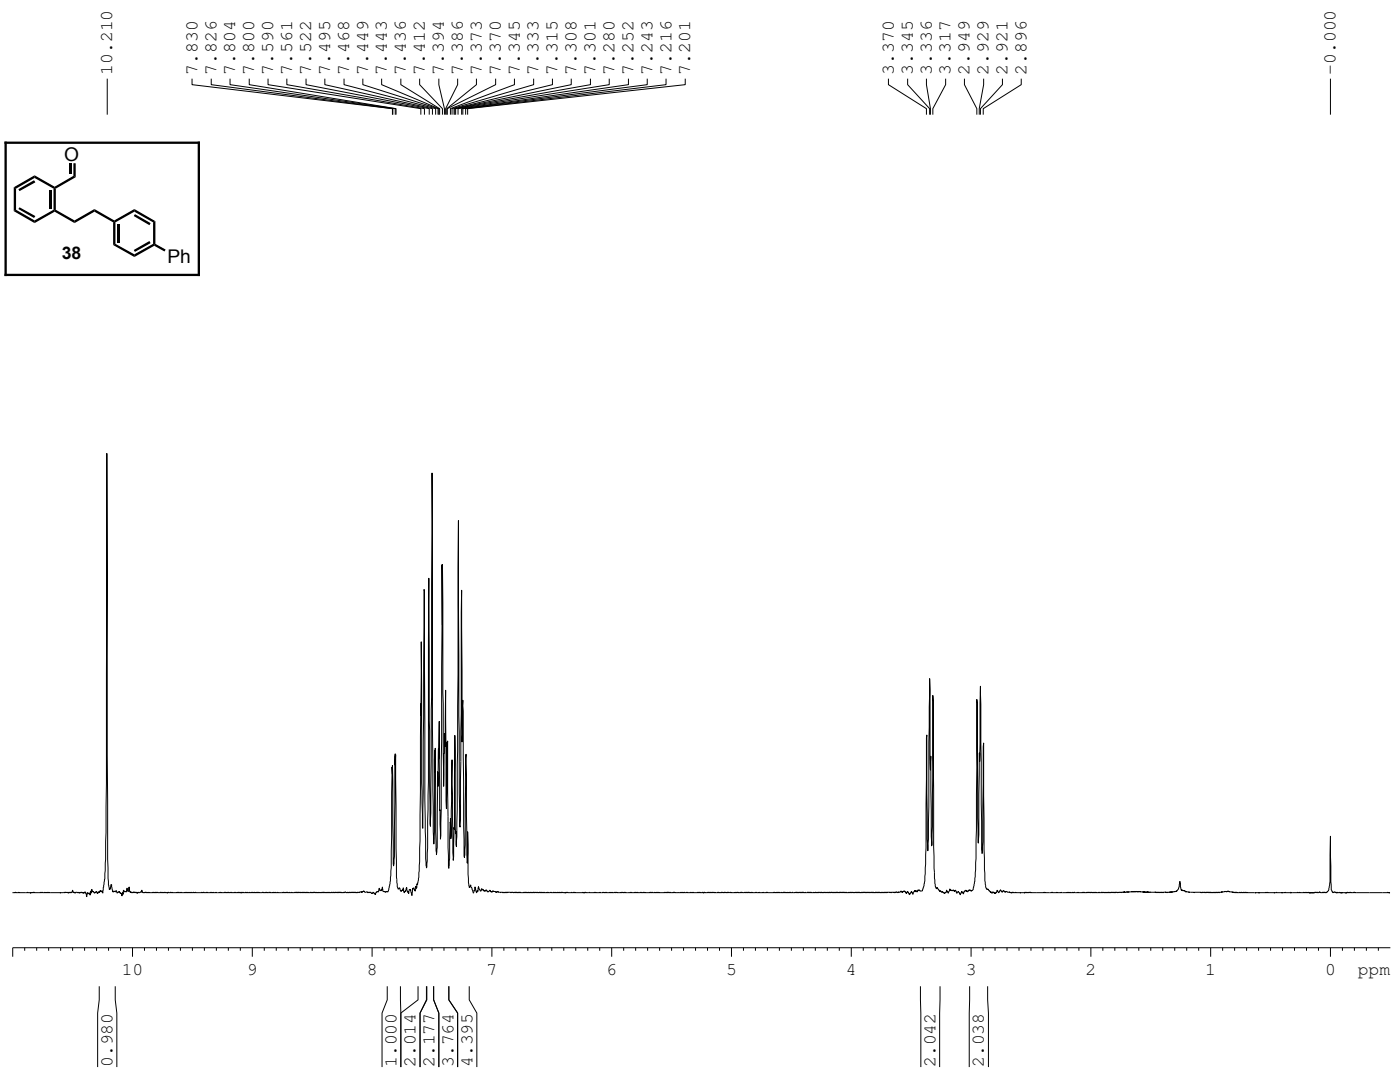

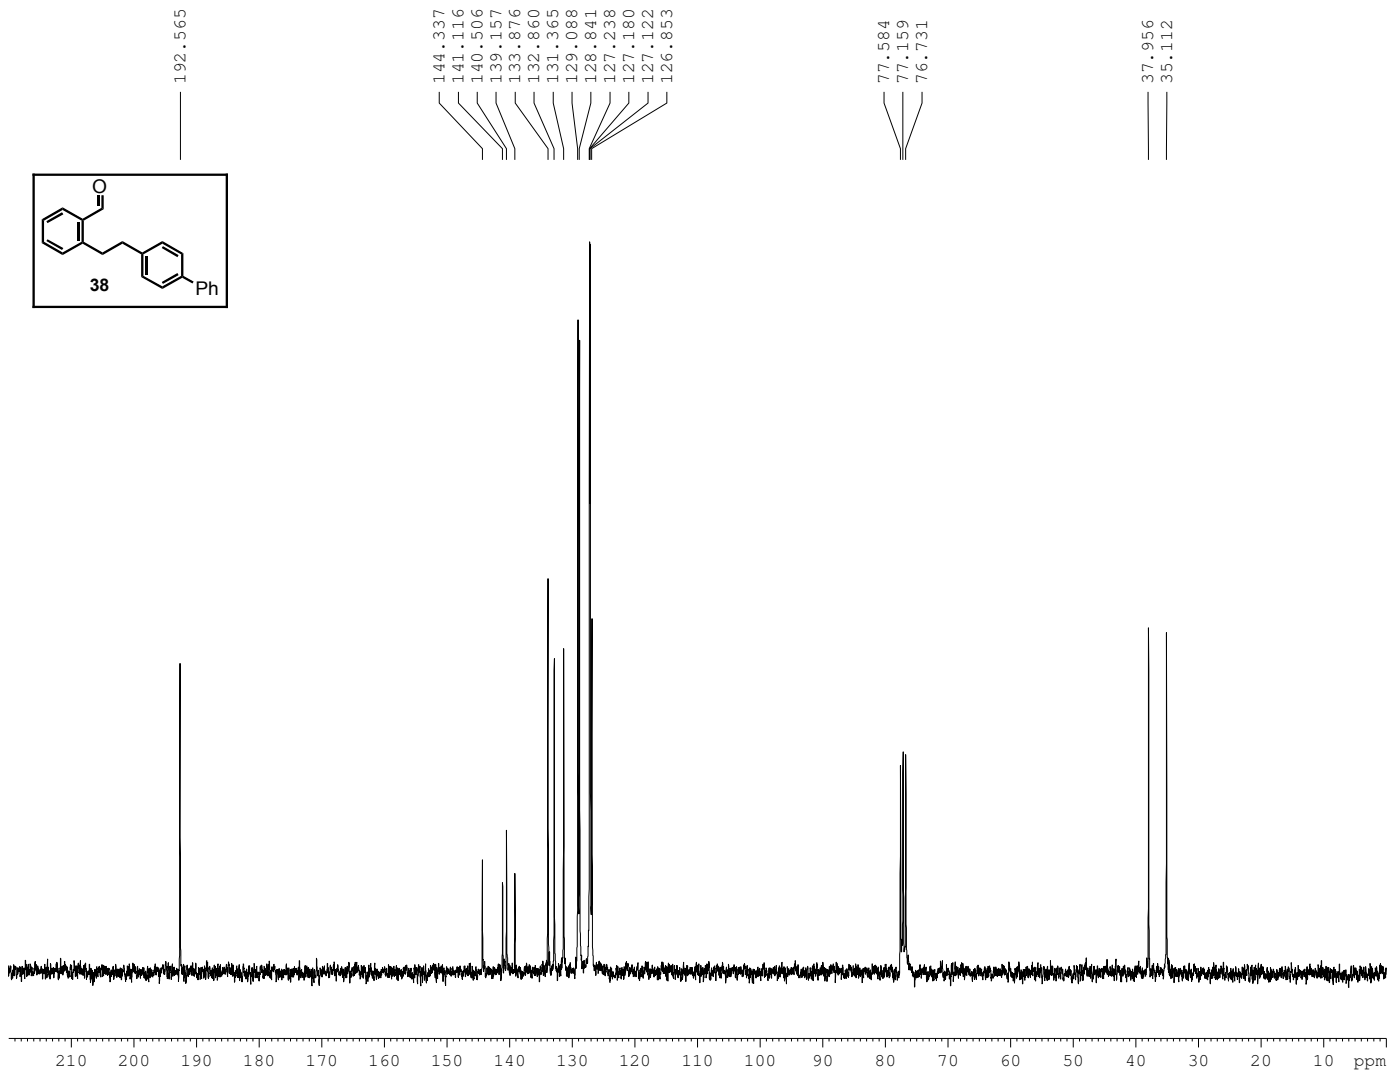



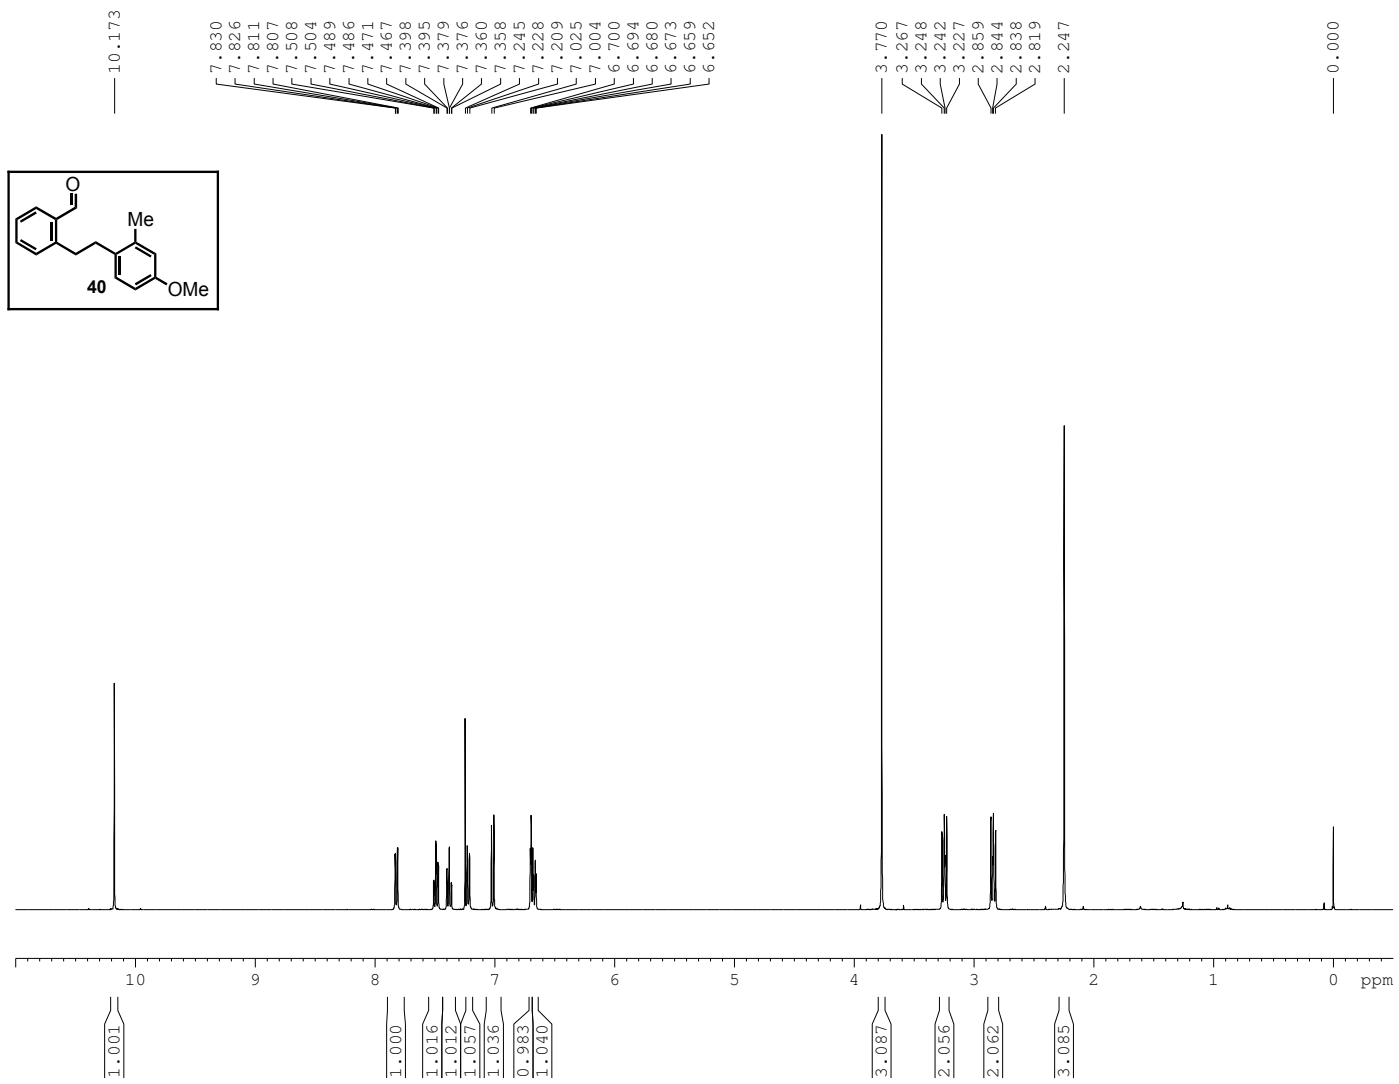

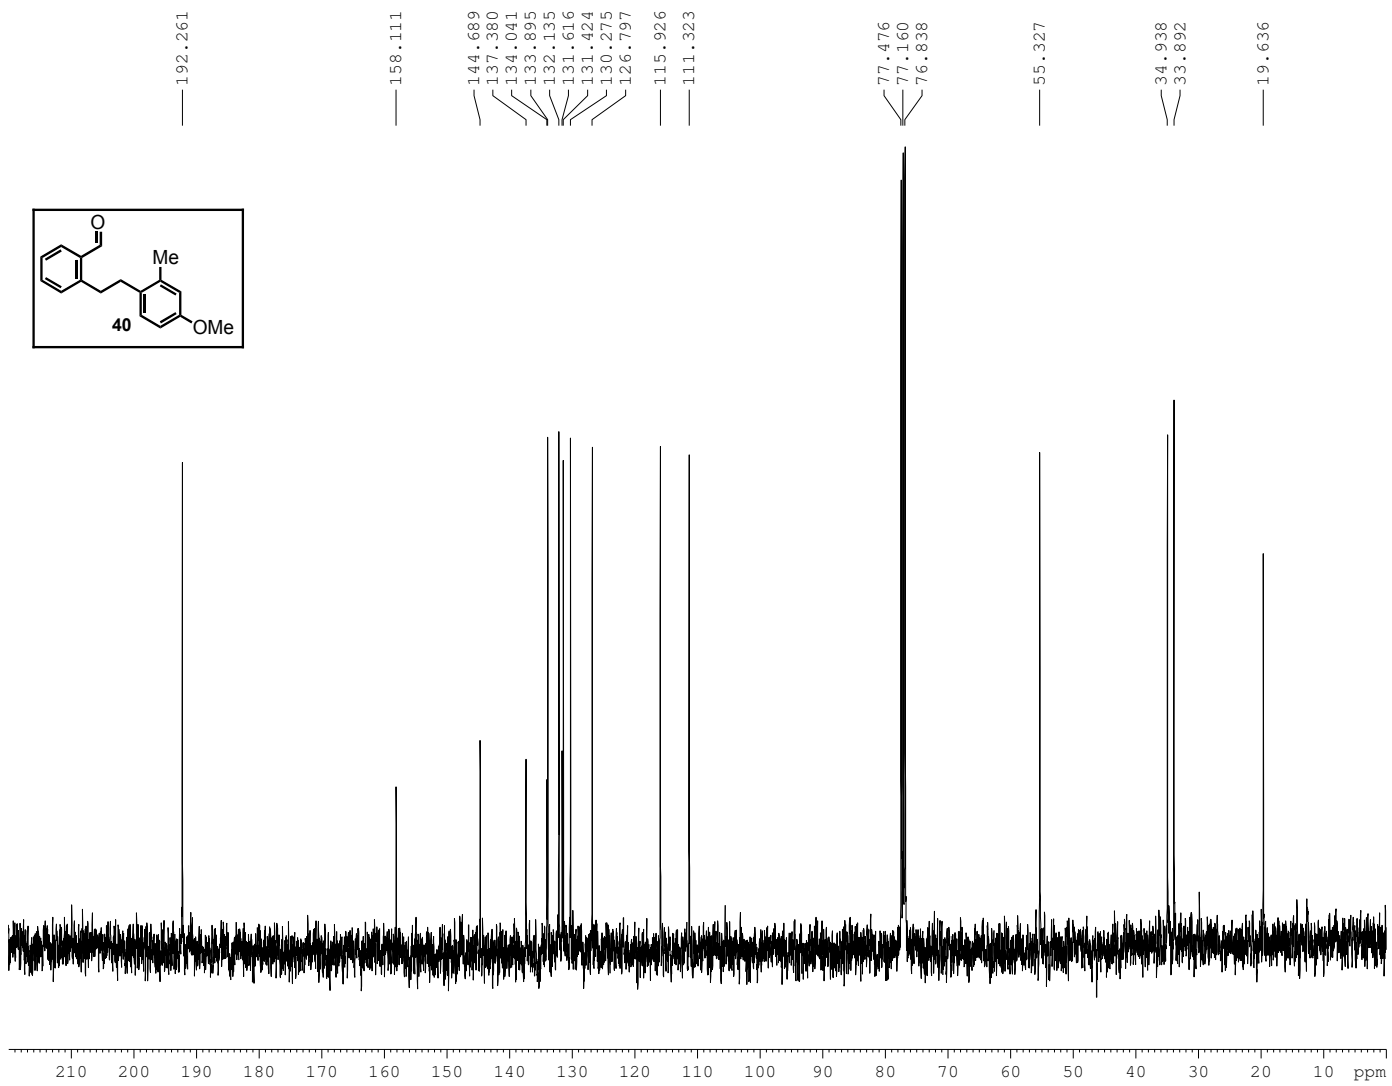

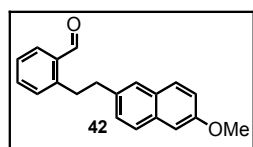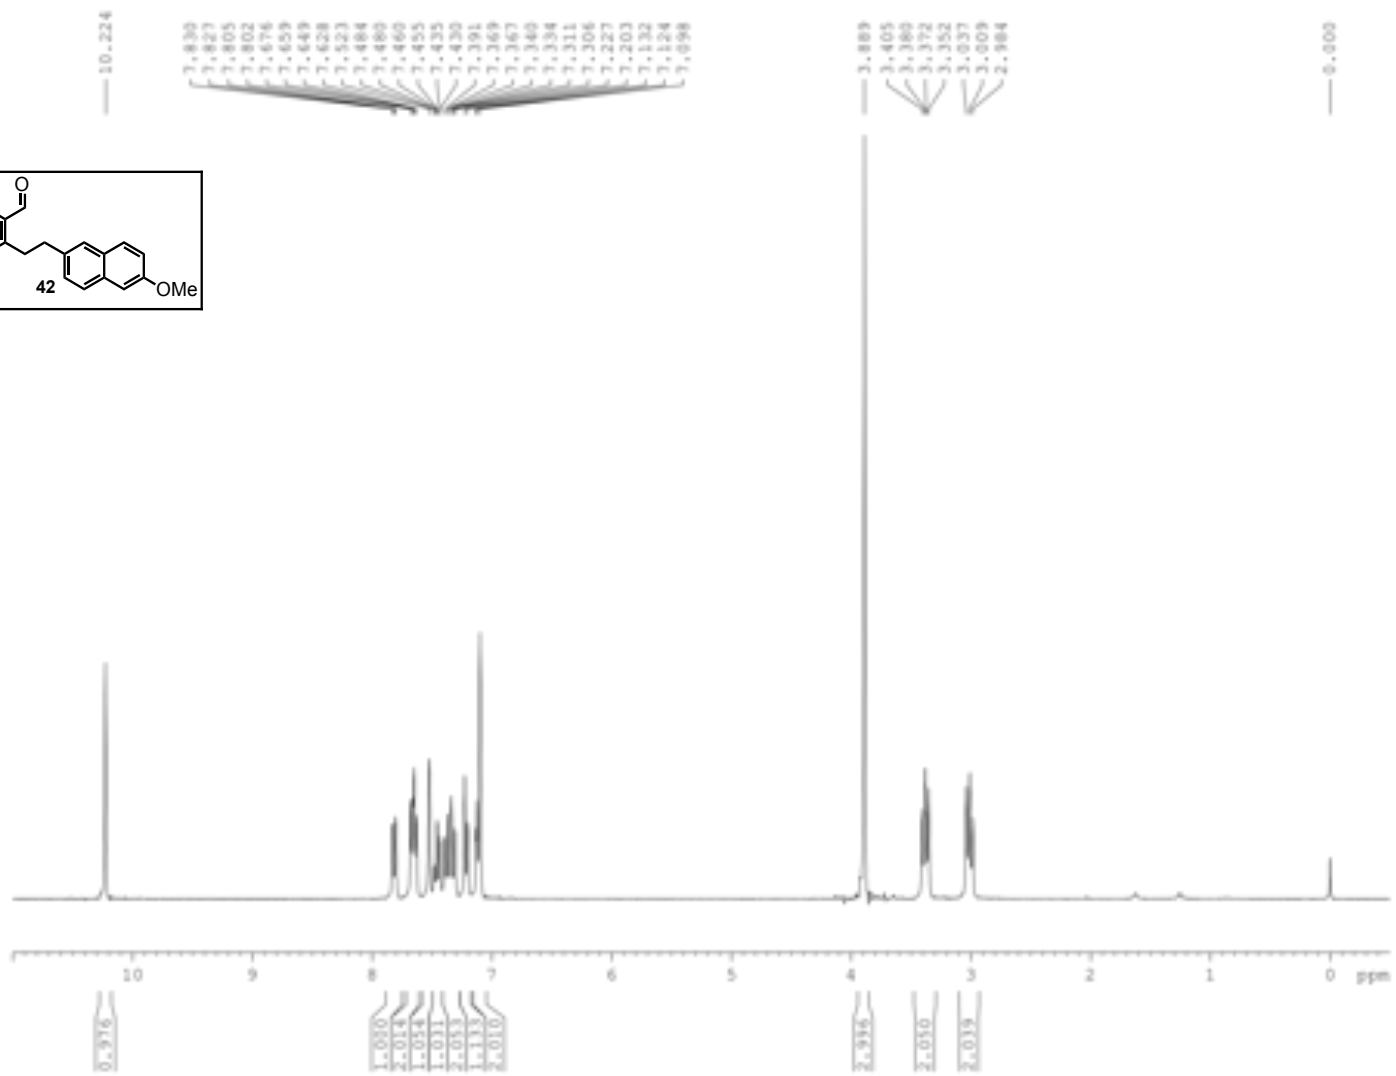

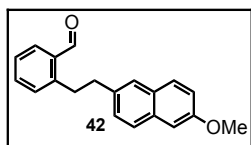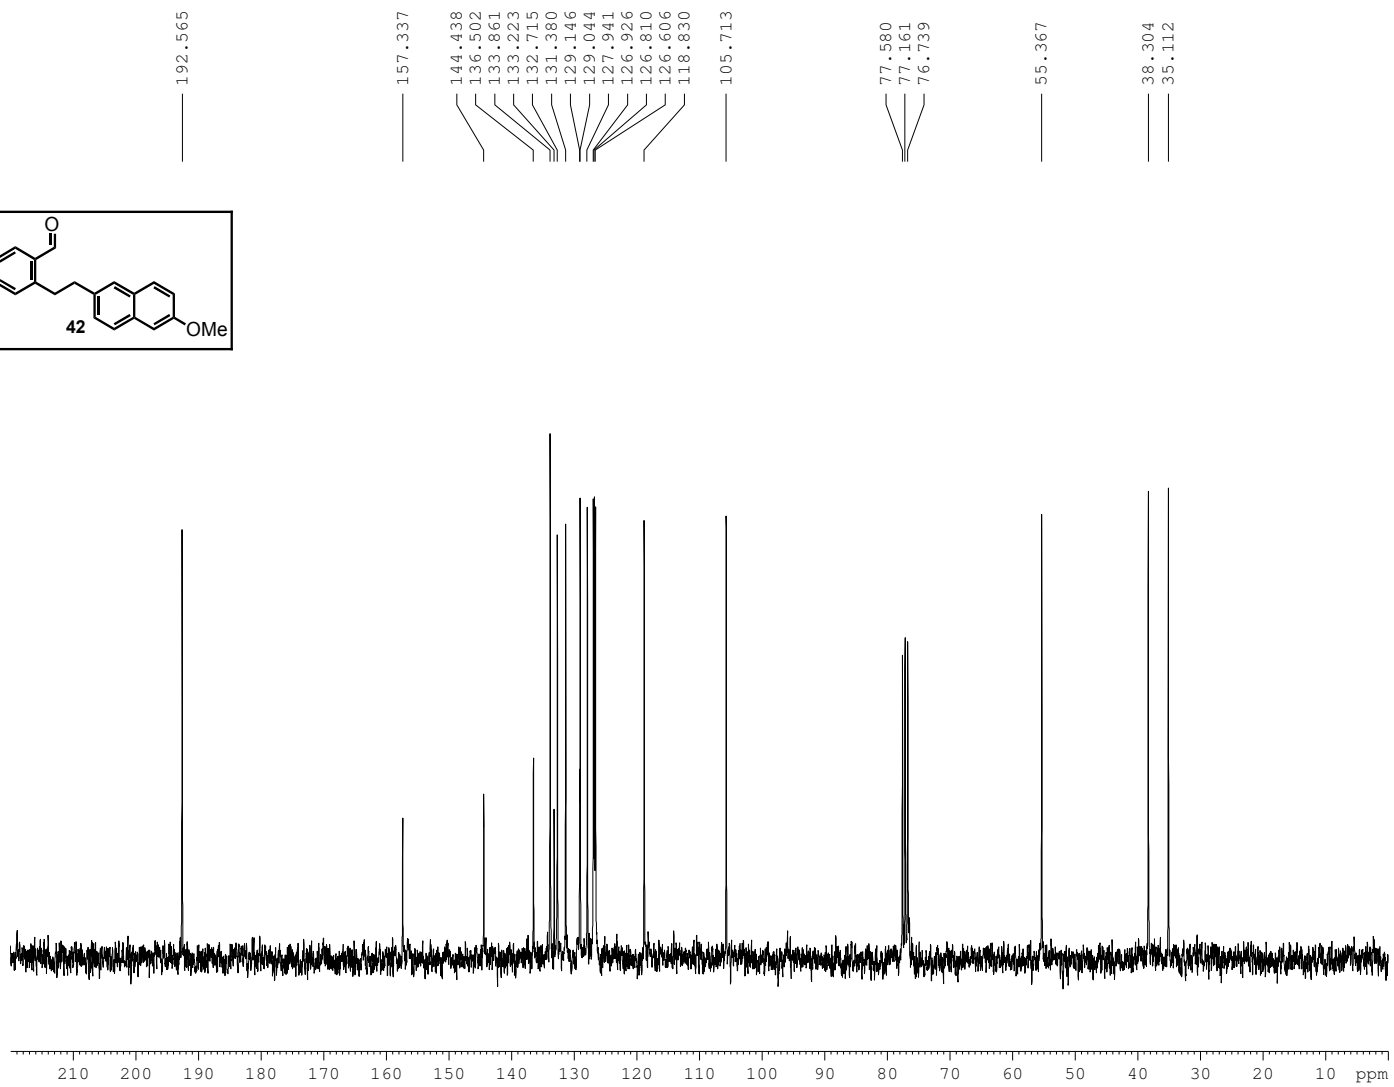

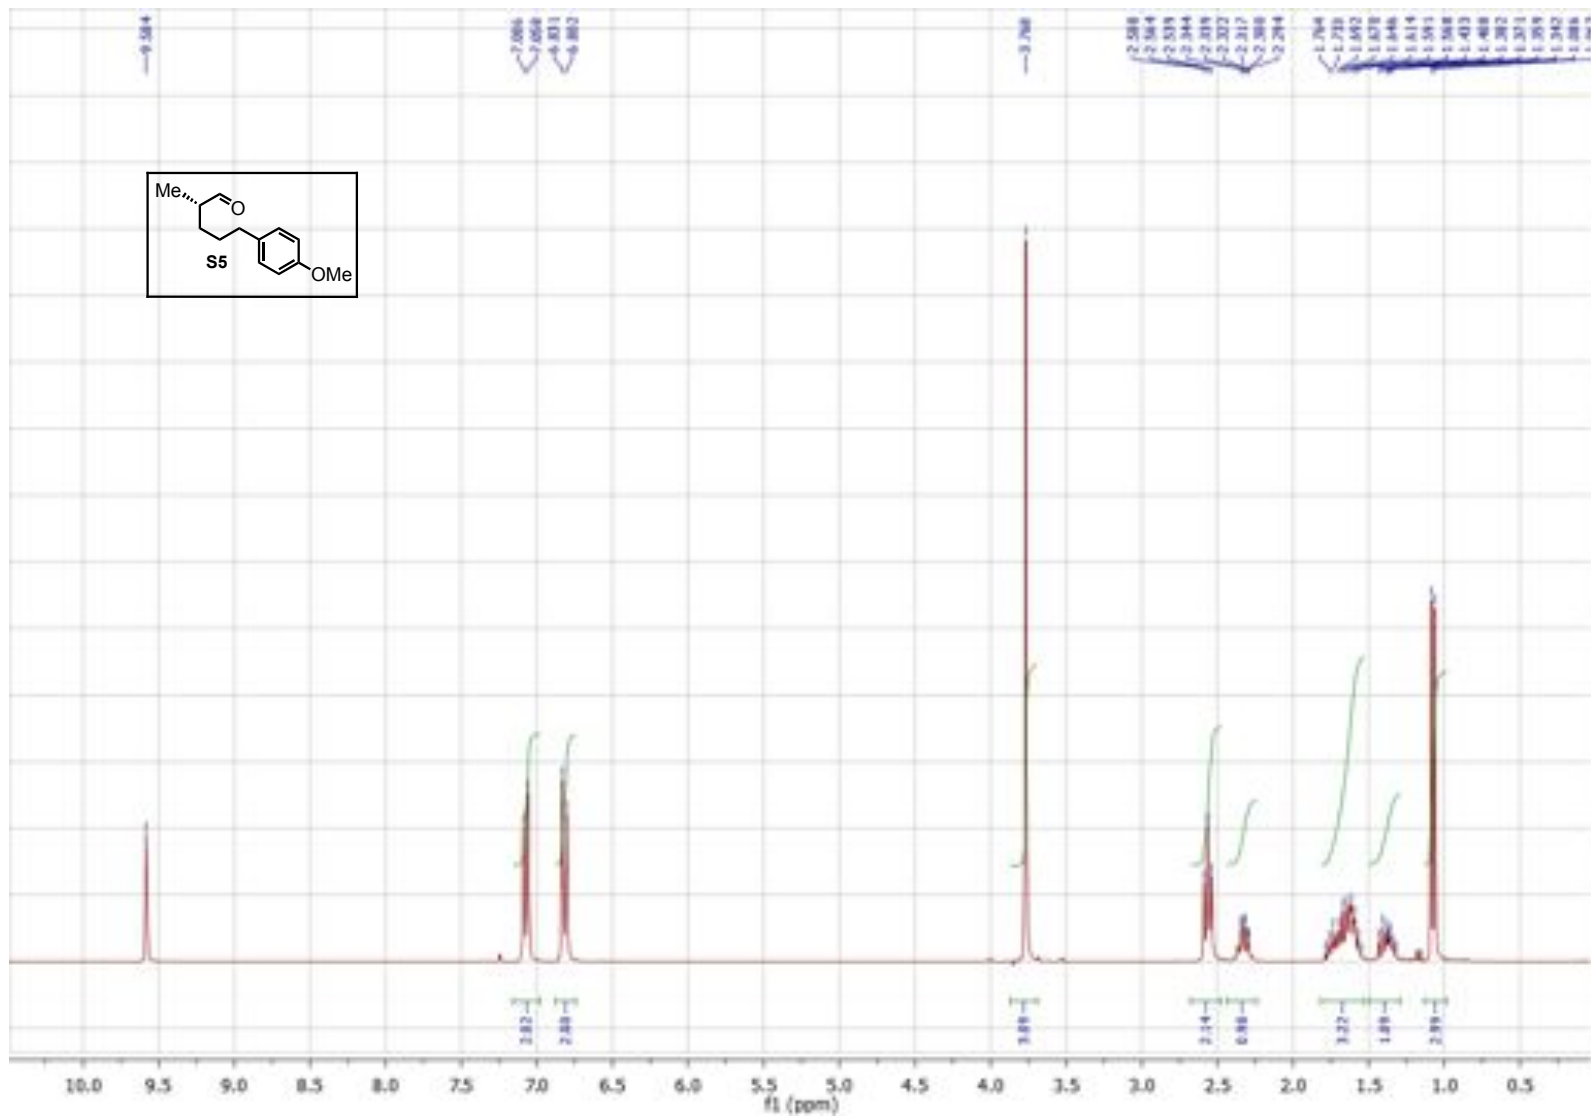

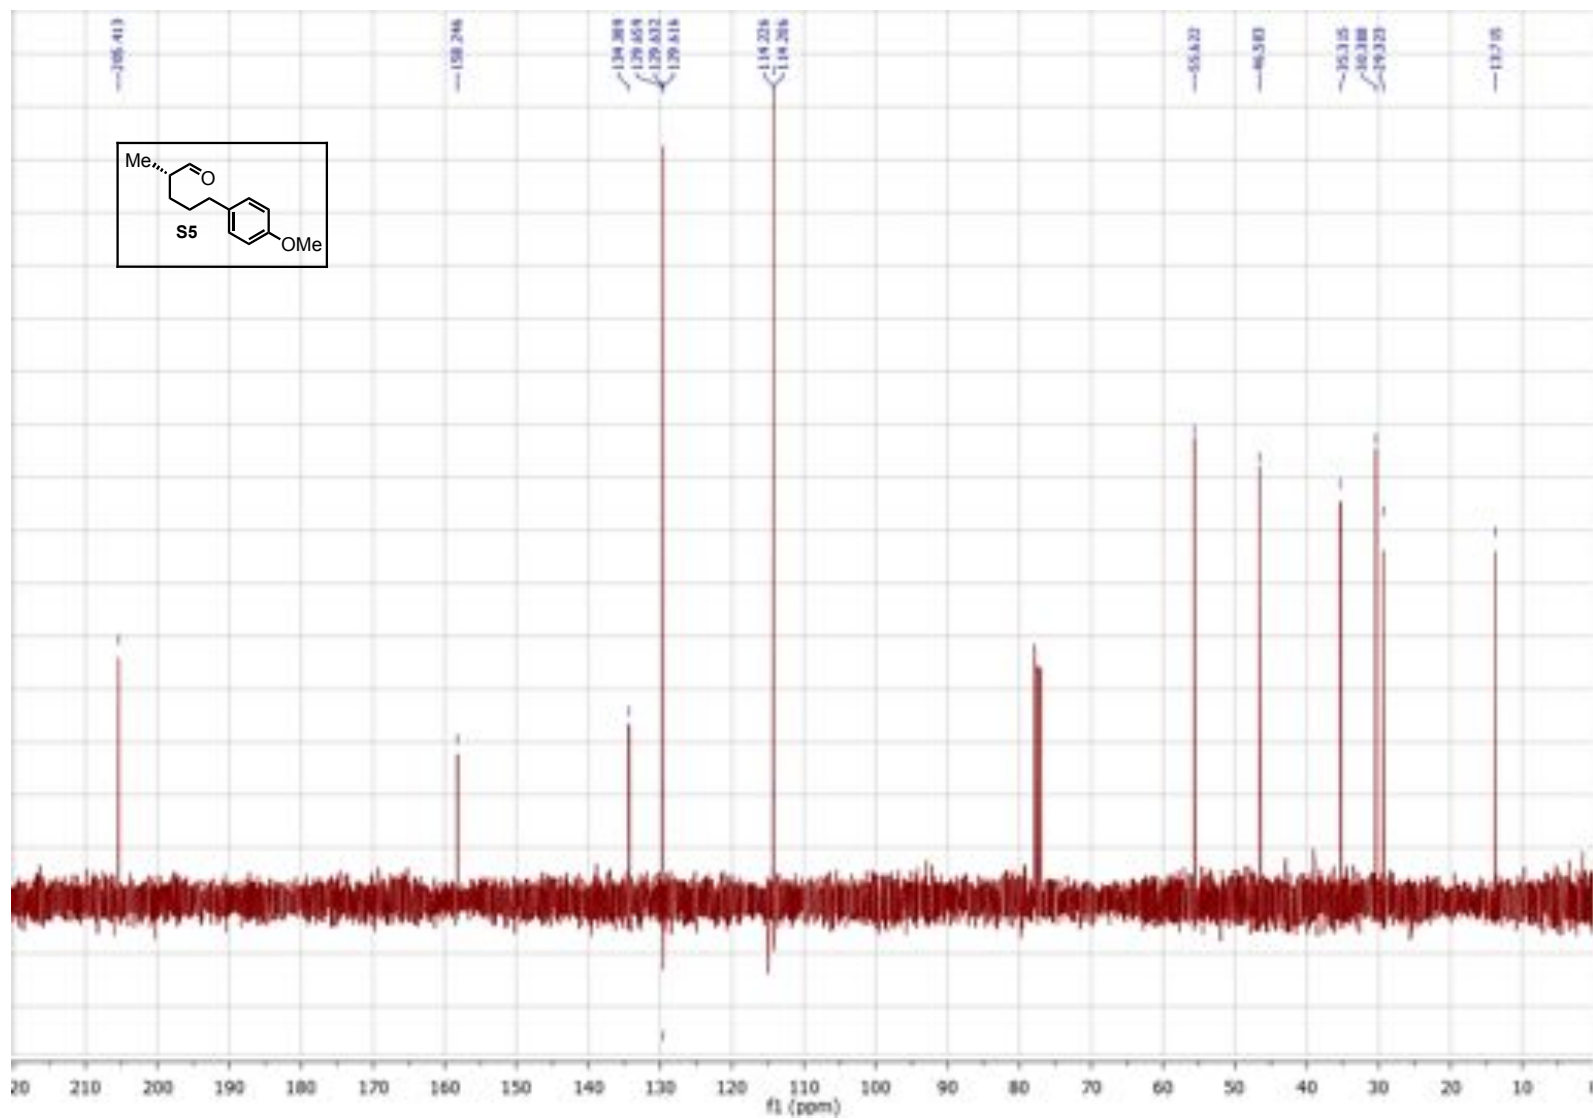

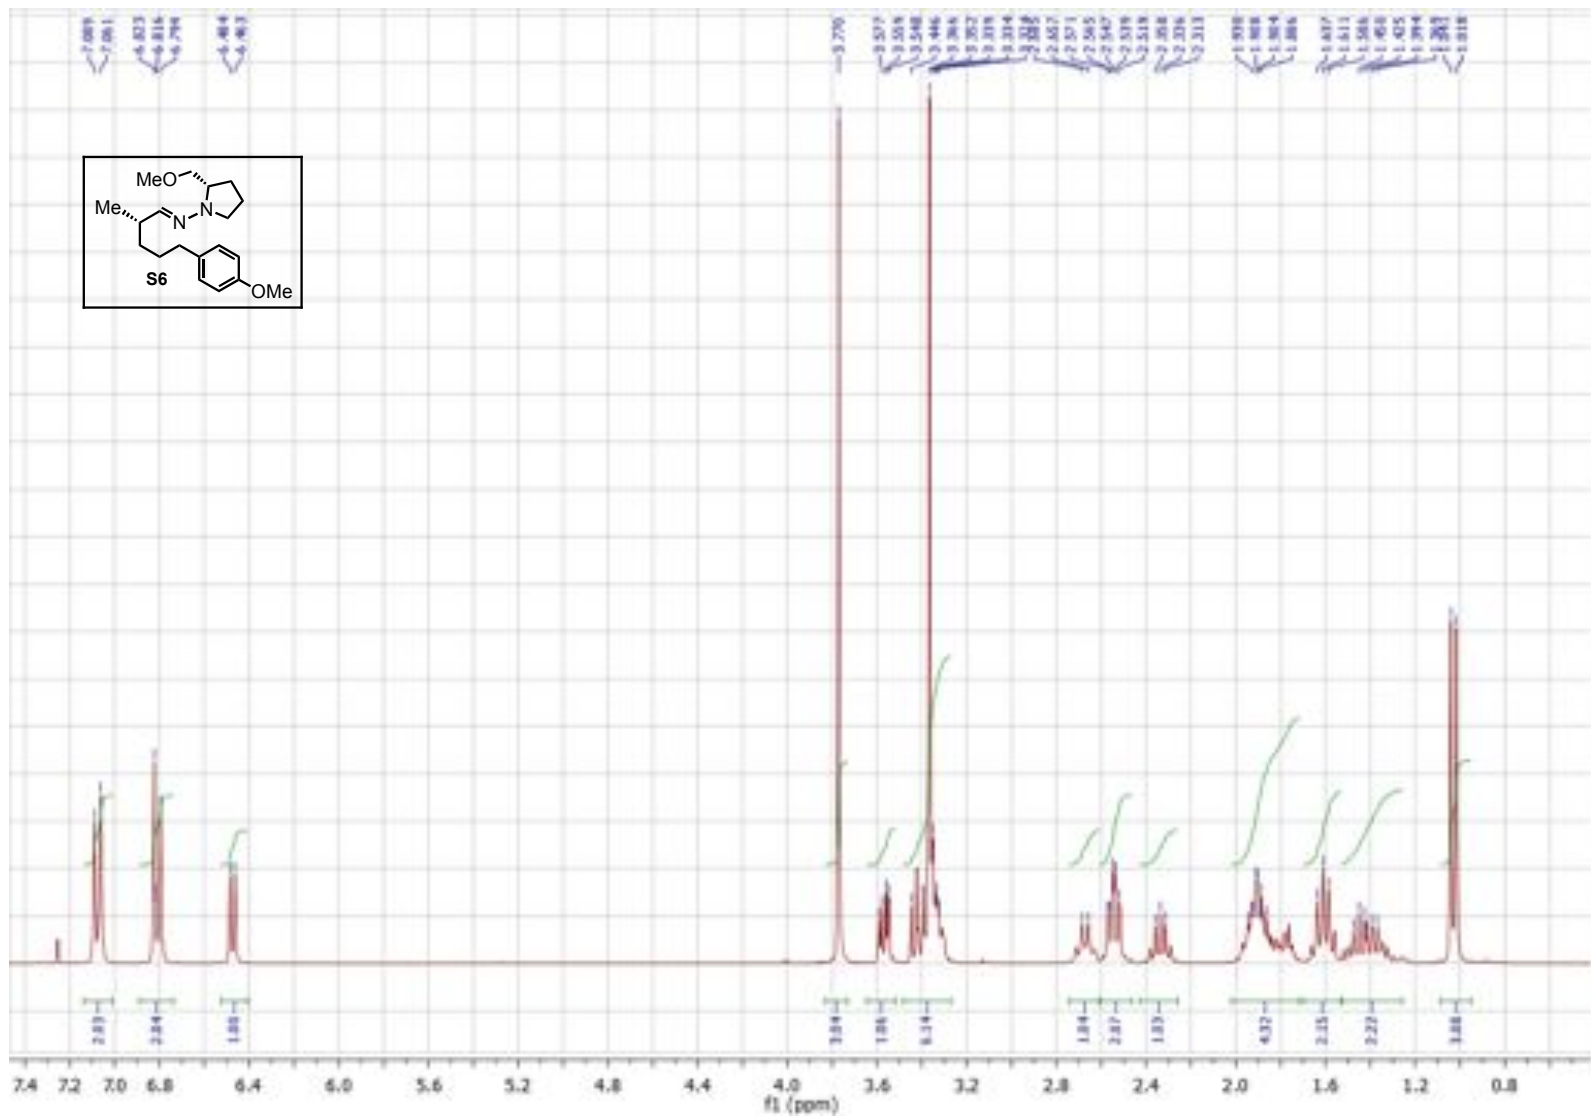

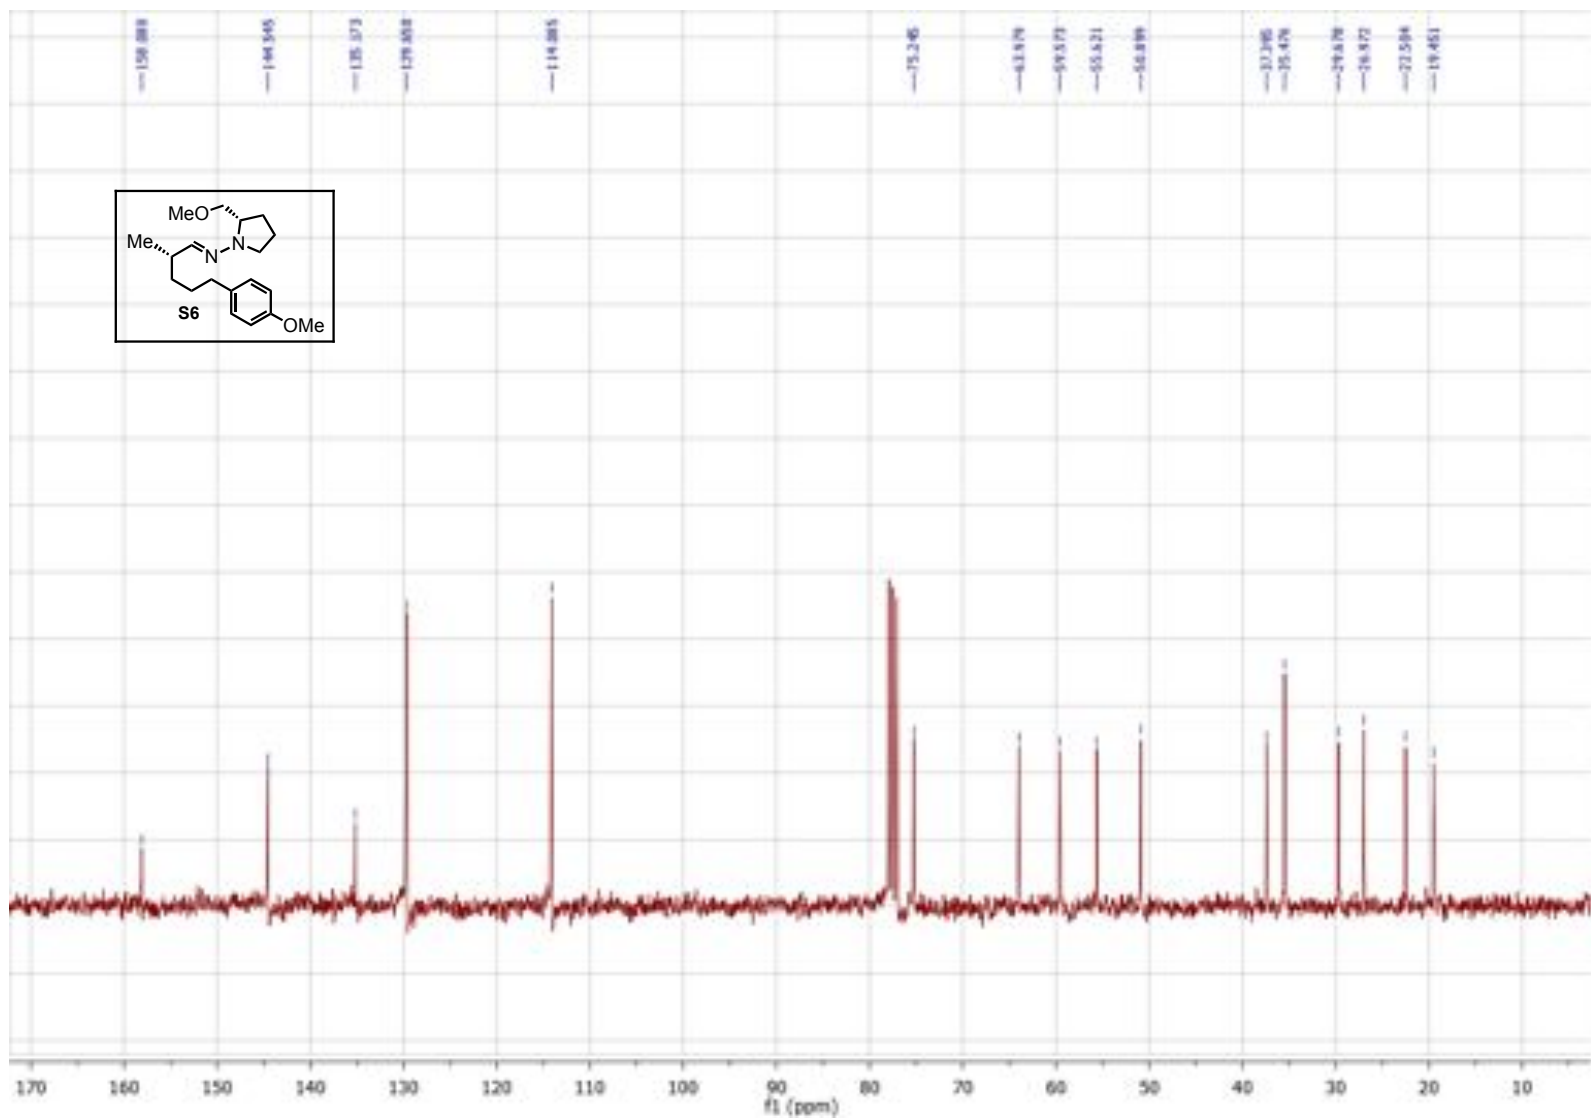

Supplement: NIHMS383244-supplement-2_si_002.pdf [file NIHMS383244-supplement-2_si_002.pdf]
