# Supplementary material
Source: PubMed Central journal article supplement (PMC3433405)

**C-H Bond Functionalization via Hydride Transfer: Formation of  $\alpha$ -Arylated Piperidines and 1,2,3,4-Tetrahydroisoquinolines via Stereoselective Intramolecular Amination of Benzylic C-H Bonds**

Paul A. Vadola, Ignacio Carrera and Dalibor Sames\*

*Department of Chemistry, Columbia University,  
3000 Broadway, New York, New York, 10027*

**Supporting Information**

NMR Spectra for HT-amination Products

| Product                                                                                       | Proton Spectrum | Carbon Spectrum |
|-----------------------------------------------------------------------------------------------|-----------------|-----------------|
| 3-(4-methoxyphenyl)-2-tosyl-1,2,3,4-tetrahydroisoquinoline (2).                               | 3               | 4               |
| 2-(4-methoxyphenyl)-5,5-dimethyl-1-tosylpiperidine (5).                                       | 5               | 6               |
| 3-(4-methoxyphenyl)-2-tosyl-2-azaspiro[5.5]undecane (7).                                      | 7               | 8               |
| 2-(4-methoxyphenyl)-4,4-dimethyl-1-tosylpiperidine (9).                                       | 9               | 10              |
| <i>trans</i> -2-(4-methoxyphenyl)-4-methyl-1-tosylpiperidine (11).                            | 11              | 12              |
| 2-(4-methoxyphenyl)-1-tosylpiperidine (13).                                                   | 13              | 14              |
| Methyl 4-(4,4-dimethyl-1-tosylpiperidin-2-yl)phenylcarbamate (15).                            | 15              | 16              |
| 5,5-dimethyl-2-phenyl-1-tosylpiperidine (17).                                                 | 17              | 18              |
| <i>cis</i> -2-(4-methoxyphenyl)-5-methyl-1-tosylpiperidine (19).                              | 19              | 20              |
| <i>trans</i> -2-(4-methoxyphenyl)-4-phenyl-1-tosylpiperidine (21).                            | 21              | 22              |
| <i>cis</i> -2-(2-methoxyphenyl)-5-methyl-1-tosylpiperidine (major diast. <i>cis</i> -23).     | 23              | 24              |
| <i>trans</i> -2-(2-methoxyphenyl)-5-methyl-1-tosylpiperidine (minor diast. <i>trans</i> -23). | 25              | 26              |
| ( <i>Z</i> )-1-methoxy-8-methyl-6,7-dihydro-5 <i>H</i> -benzo[7]annulene (25).                | 27              | 28              |
| 7-fluoro-3-(4-methoxyphenyl)-2-tosyl-1,2,3,4-tetrahydroisoquinoline (29).                     | 29              | 30              |
| 6-fluoro-3-(4-methoxyphenyl)-2-tosyl-1,2,3,4-tetrahydroisoquinoline (31).                     | 31              | 32              |
| 6,7-fluoro-3-(4-methoxyphenyl)-2-tosyl-1,2,3,4-tetrahydroisoquinoline (33).                   | 33              | 34              |
| 3-(4-methoxyphenyl)-2-tosyl-1,2,3,4-tetrahydrobenzo[ <i>f</i> ]isoquinoline (35).             | 35              | 36              |
| 3-(biphenyl-4-yl)-2-tosyl-1,2,3,4-tetrahydroisoquinoline (39).                                | 37              | 38              |
| 3-(4-methoxy-2-methylphenyl)-2-tosyl-1,2,3,4-tetrahydroisoquinoline (41).                     | 39              | 40              |
| 3-(6-methoxynaphthalen-2-yl)-2-tosyl-1,2,3,4-tetrahydroisoquinoline (43).                     | 41              | 42              |
| 3-(4-methoxyphenyl)-1,2,3,4-tetrahydroisoquinoline (44).                                      | 43              | 44              |
| <i>cis</i> -2-(4-methoxyphenyl)-5-methylpiperidine (45).                                      | 45              | 46              |

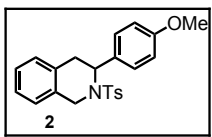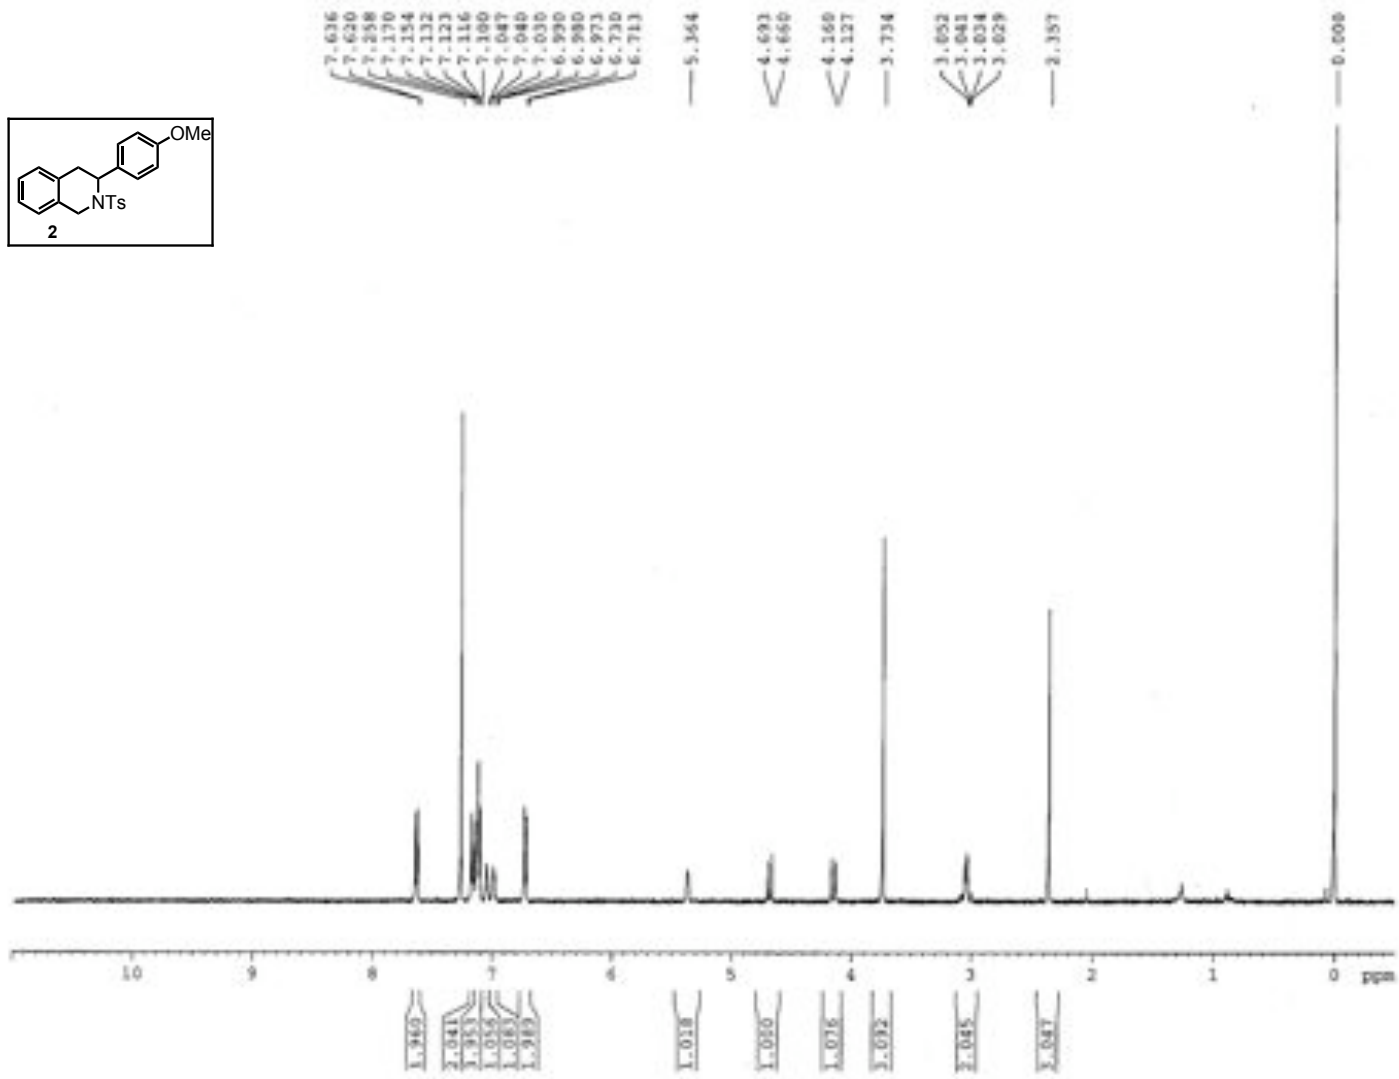

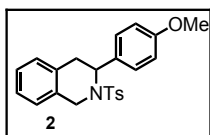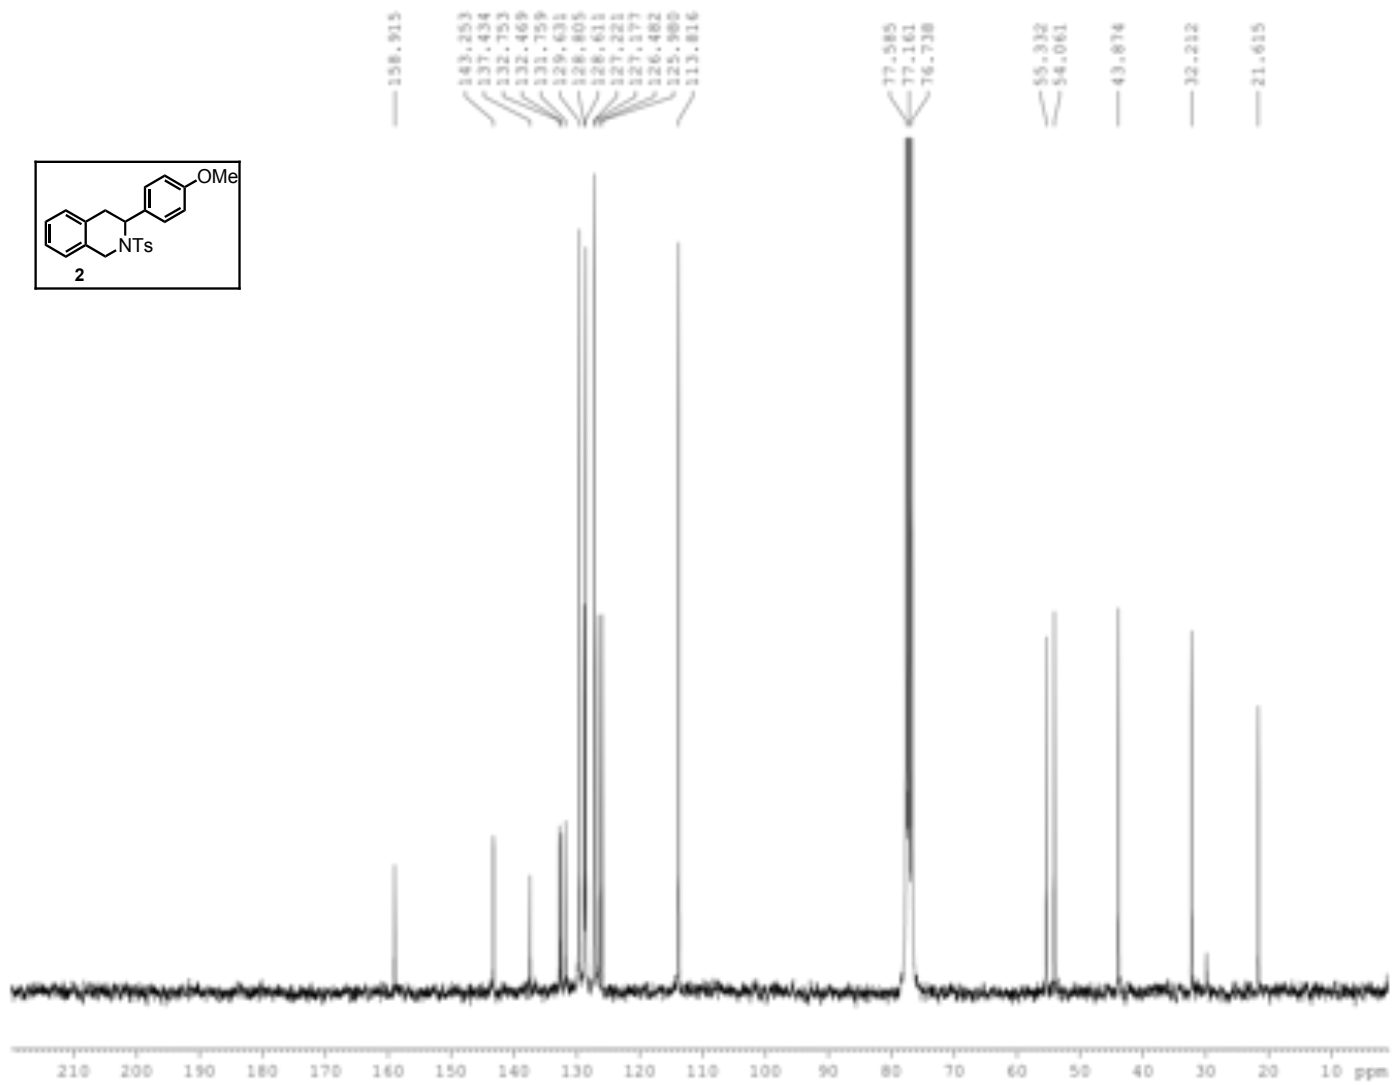

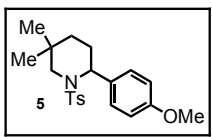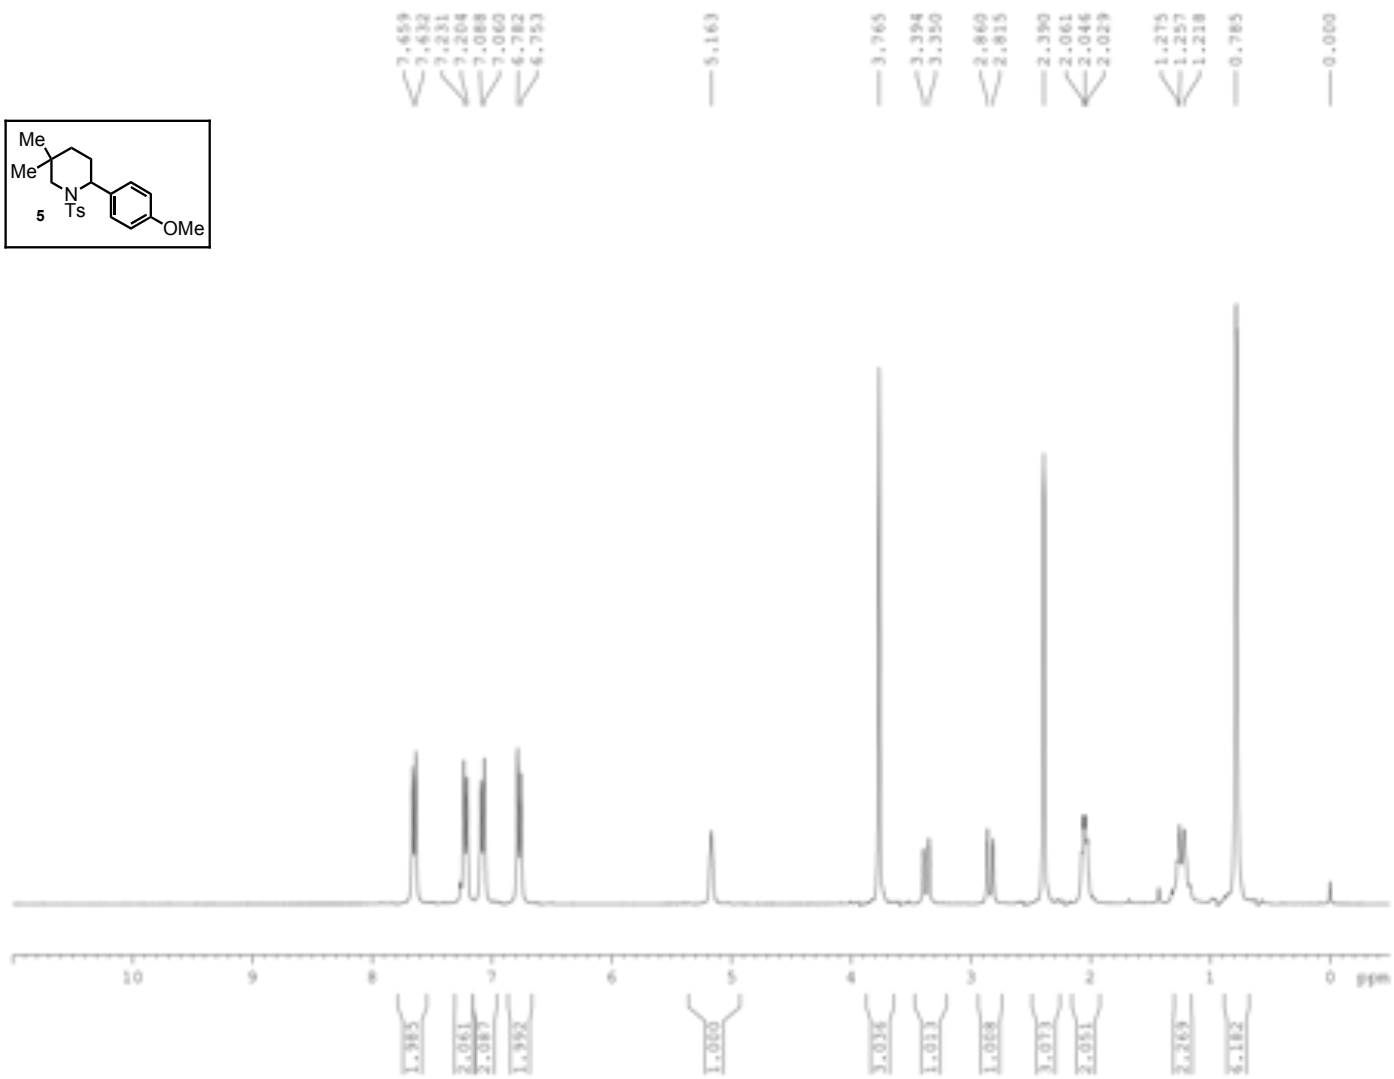

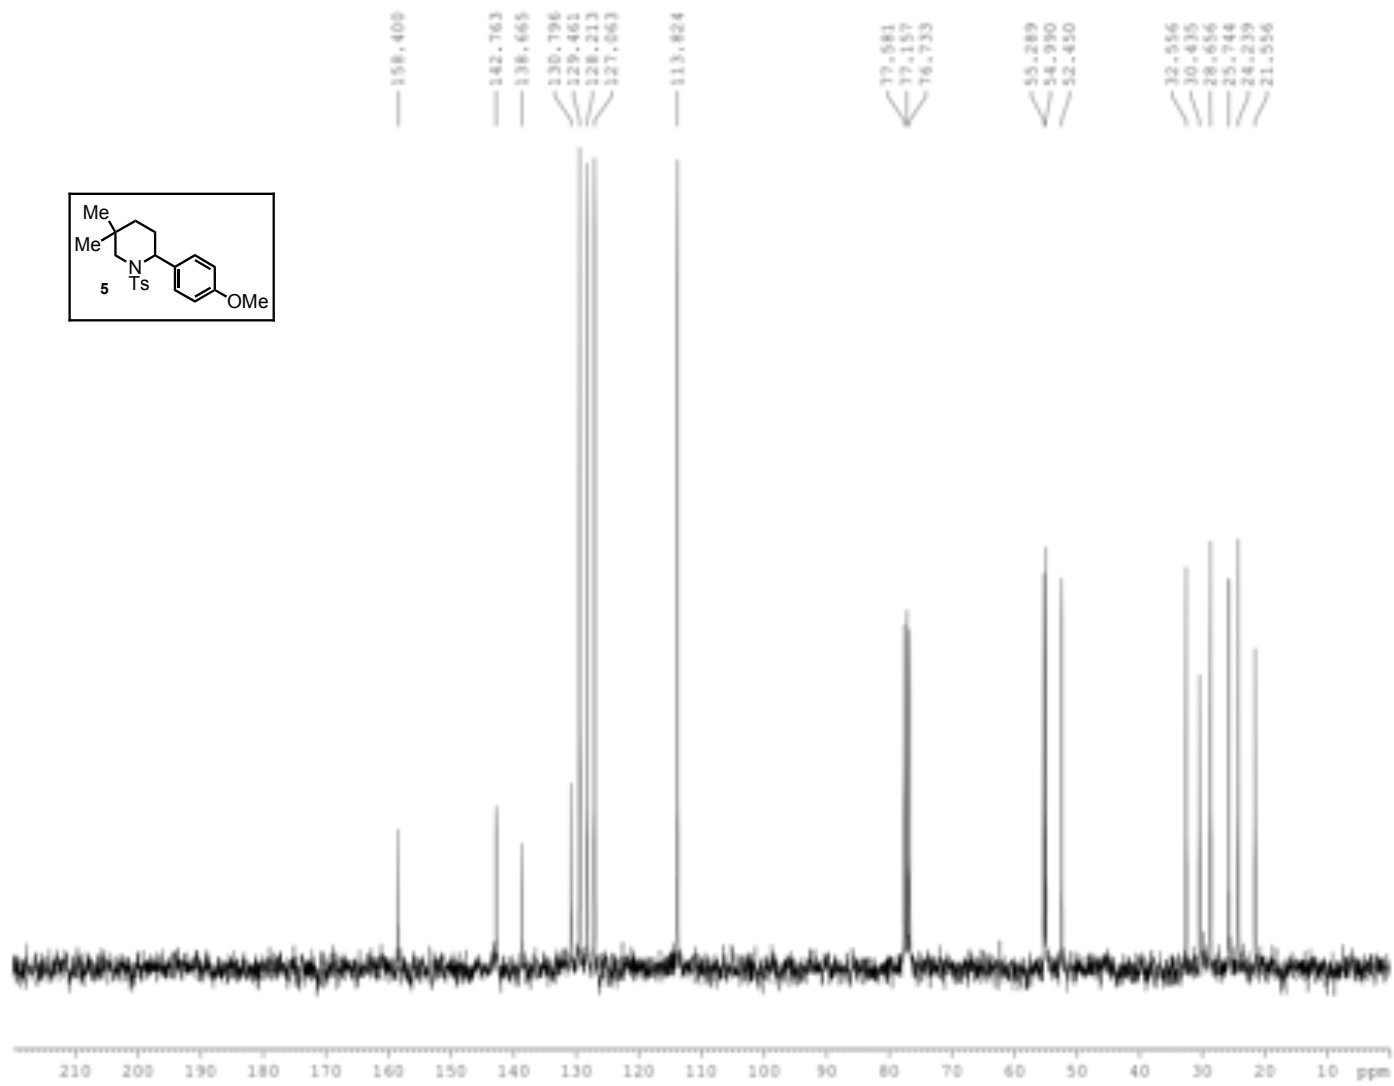

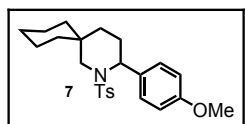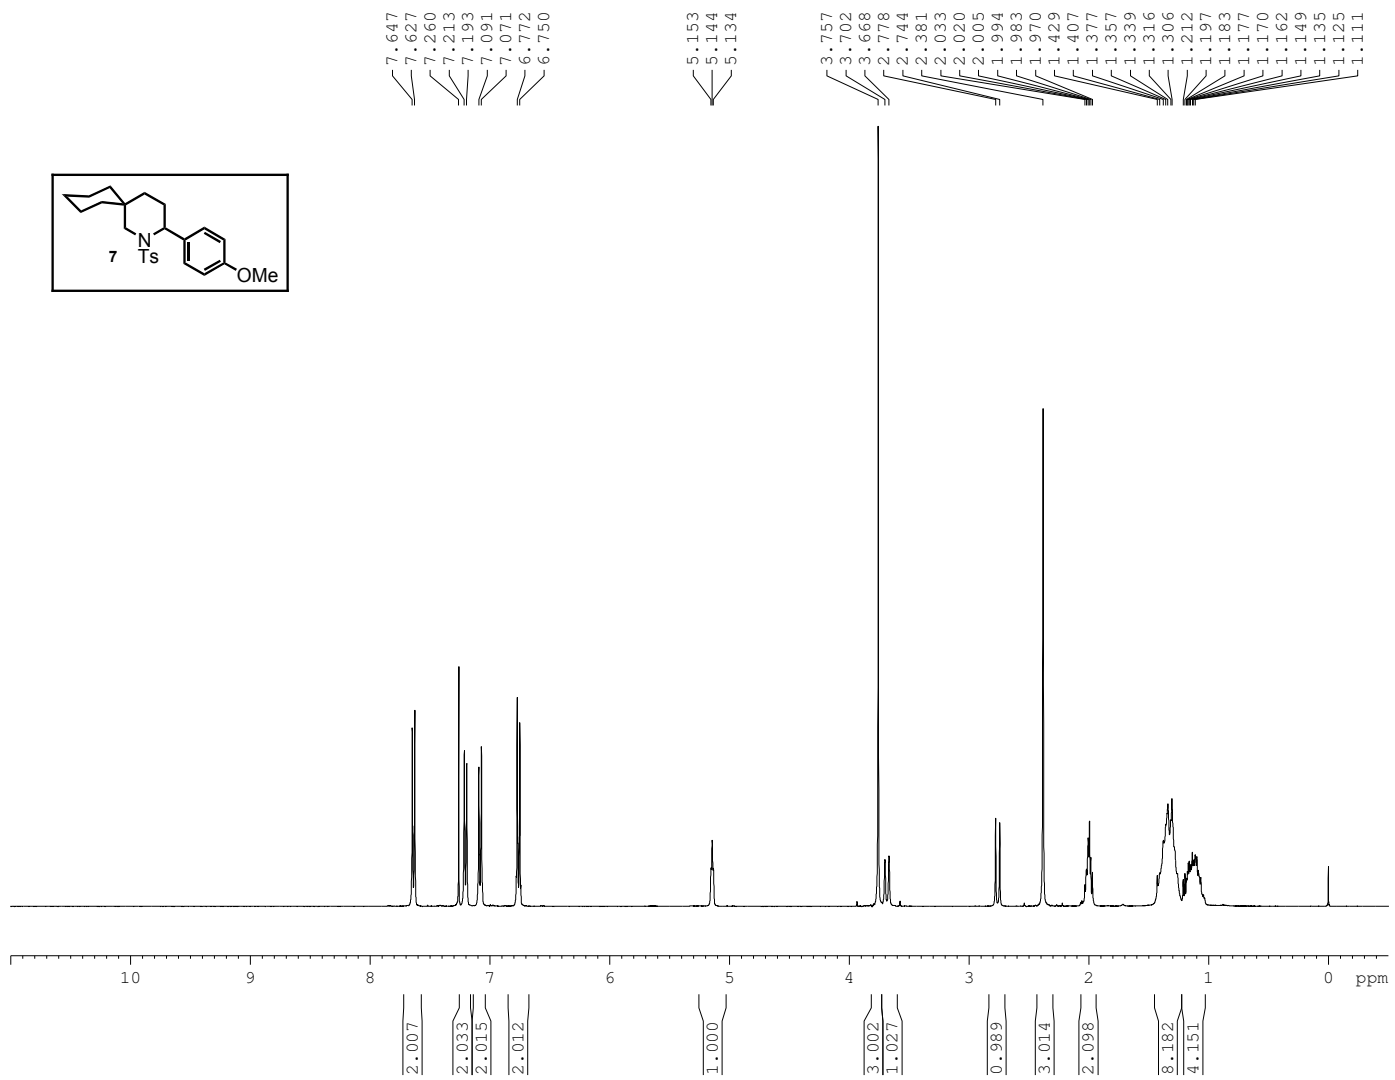

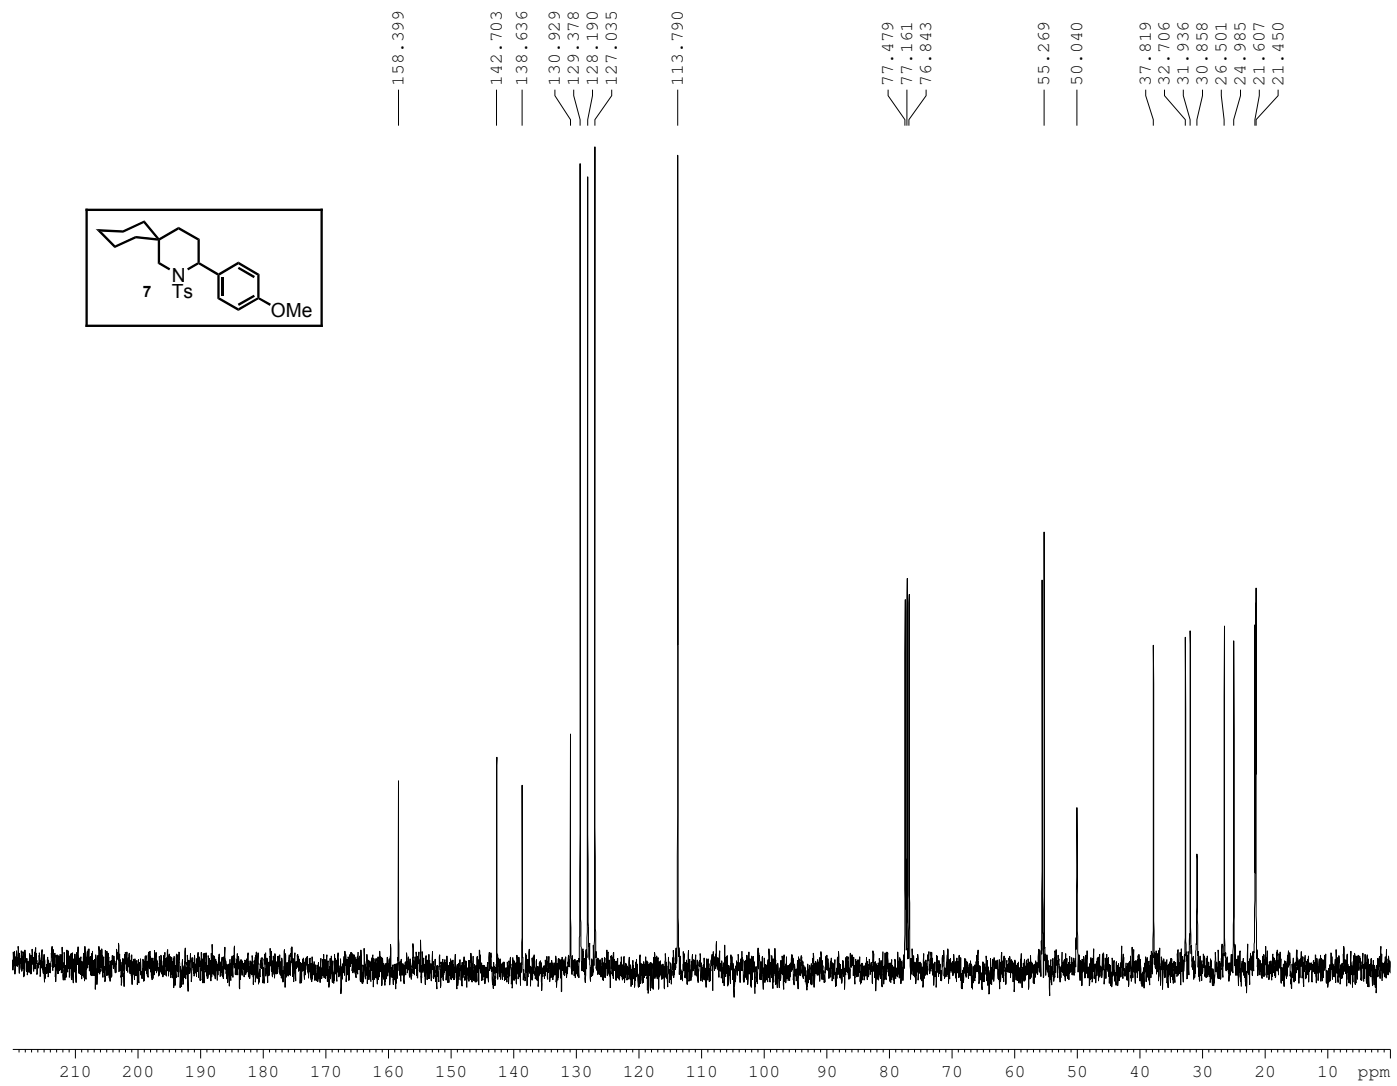



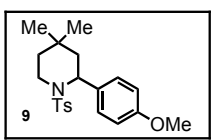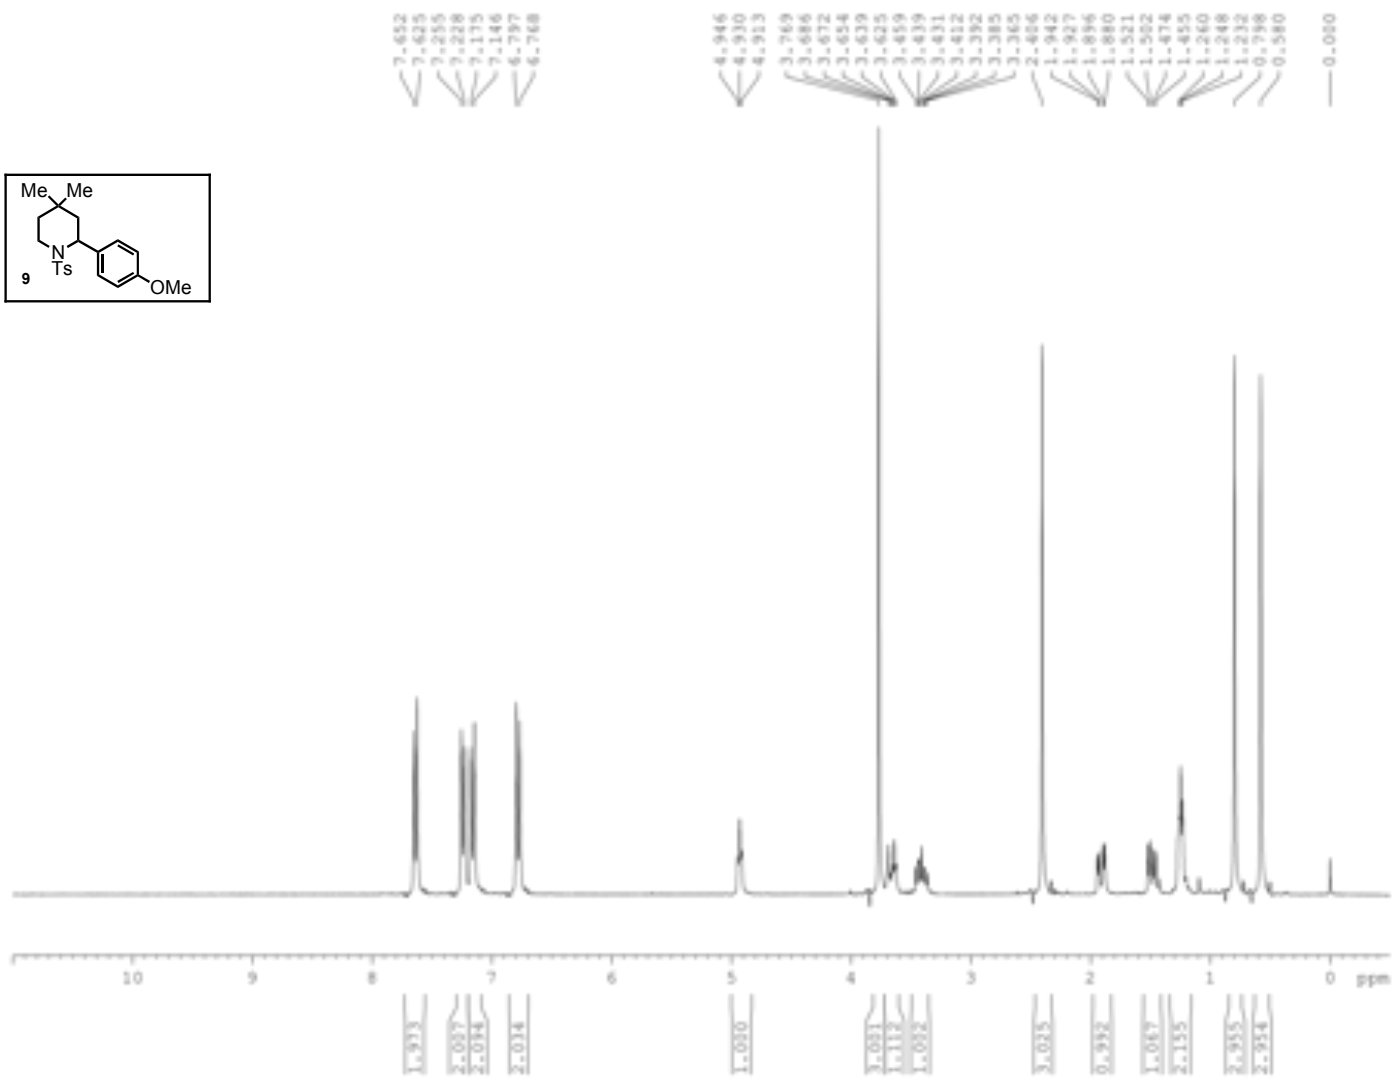

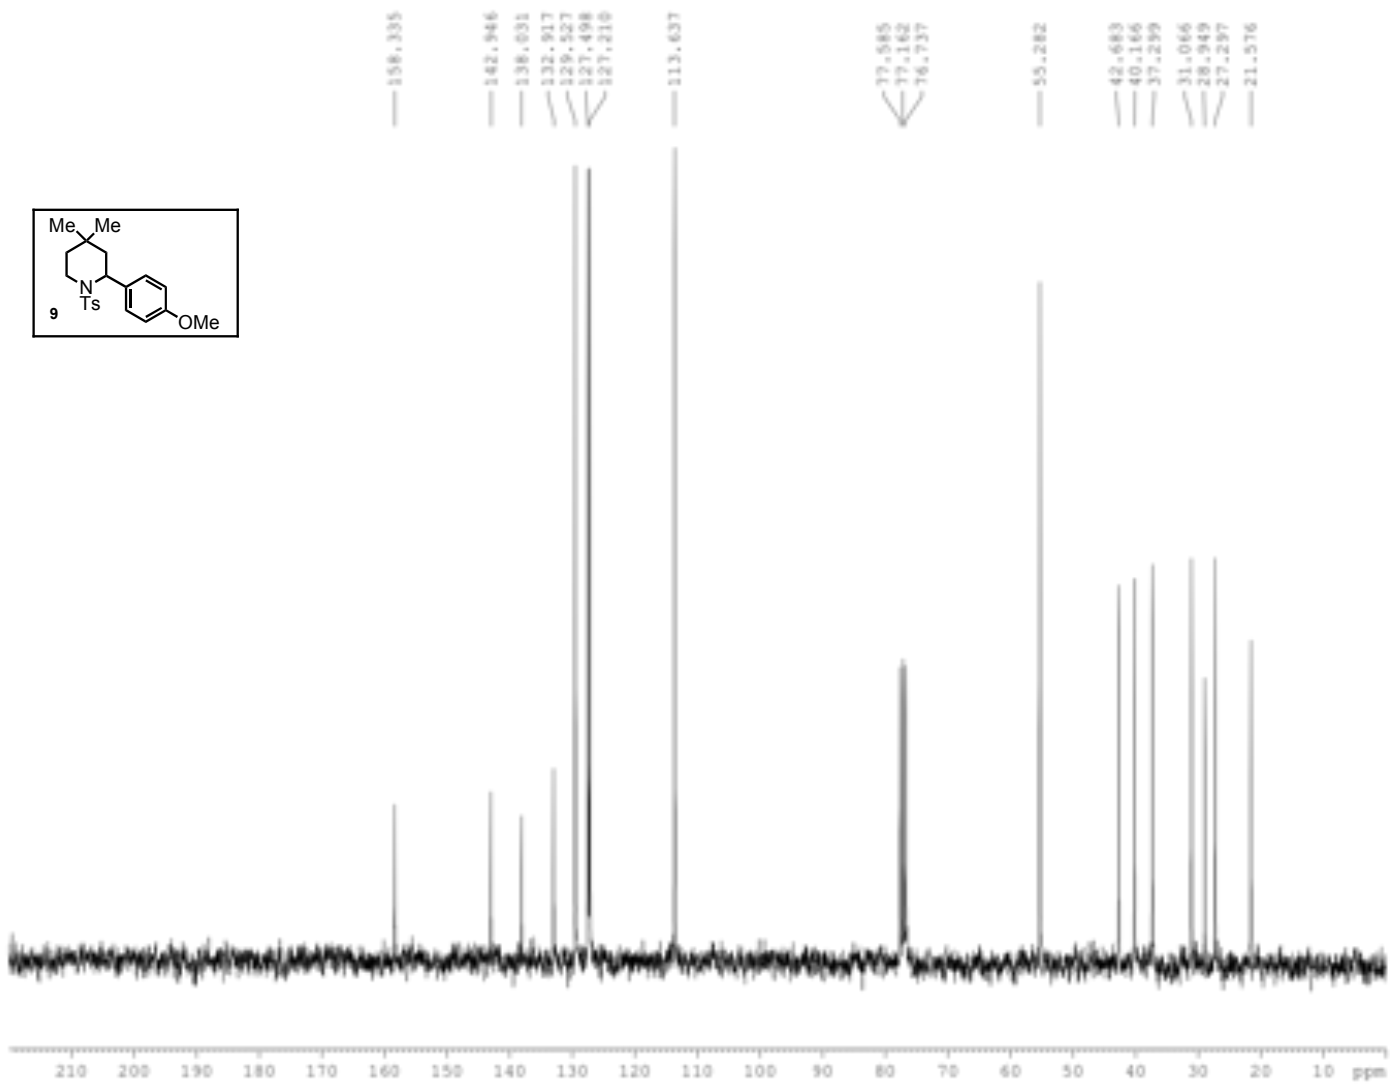

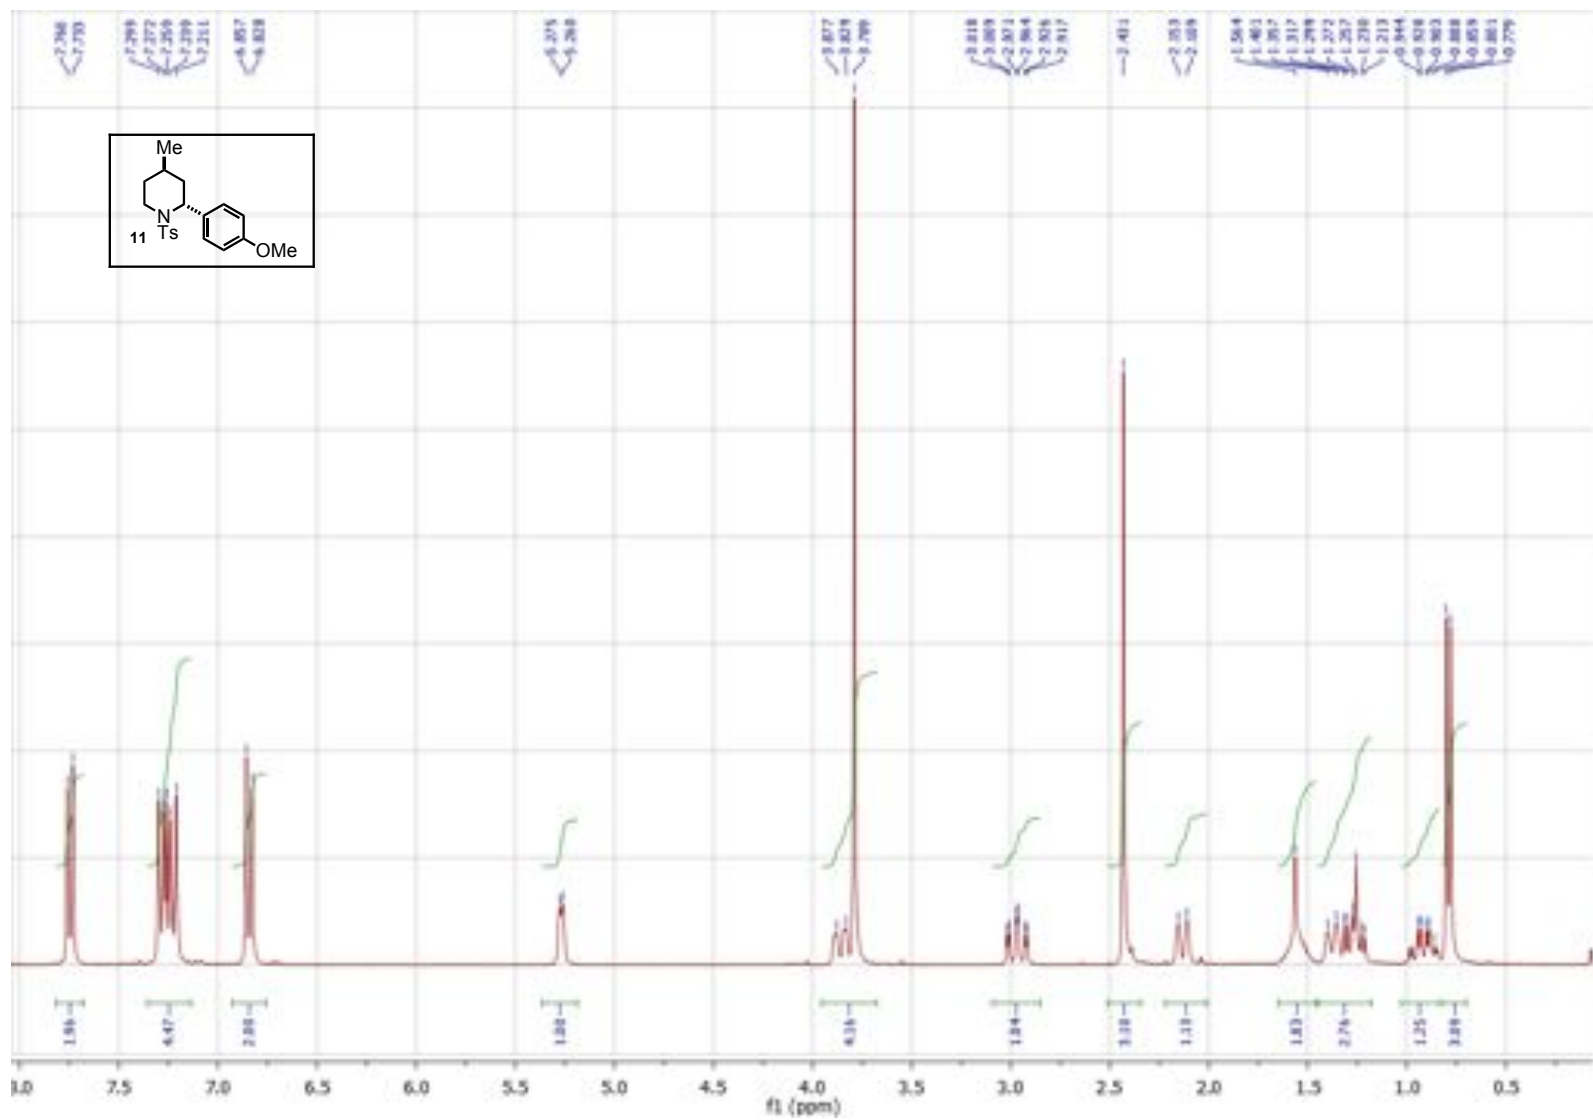

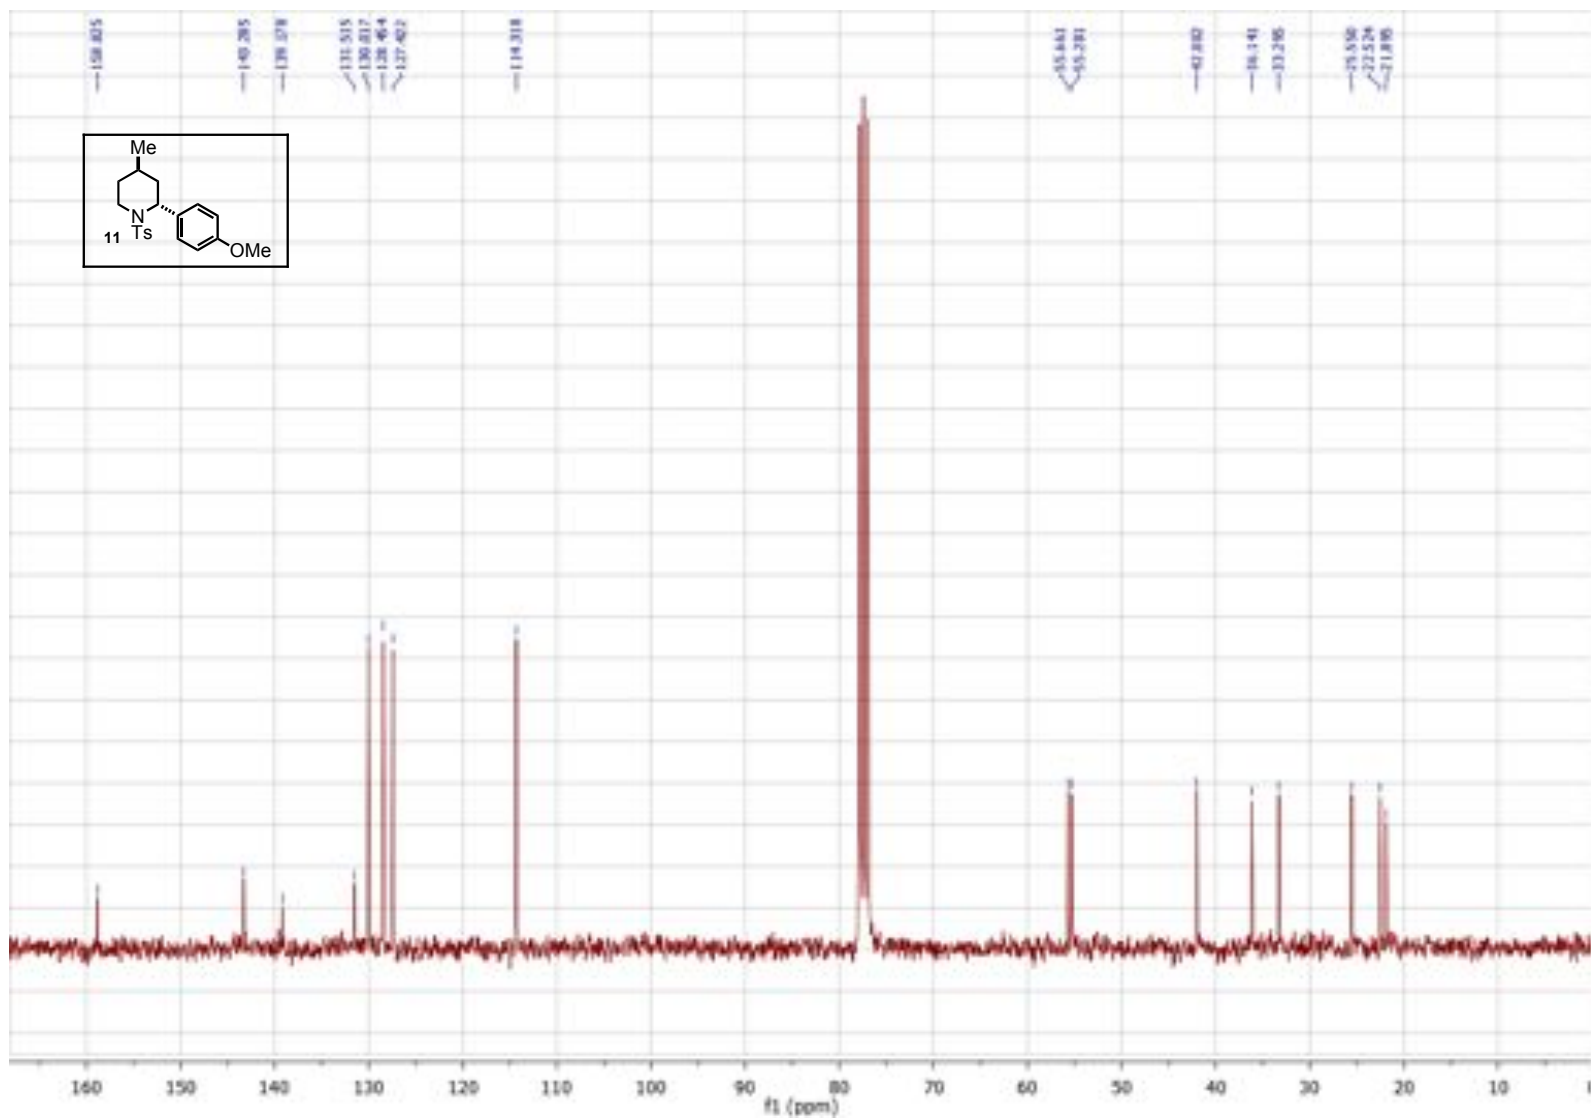

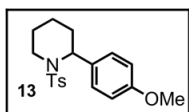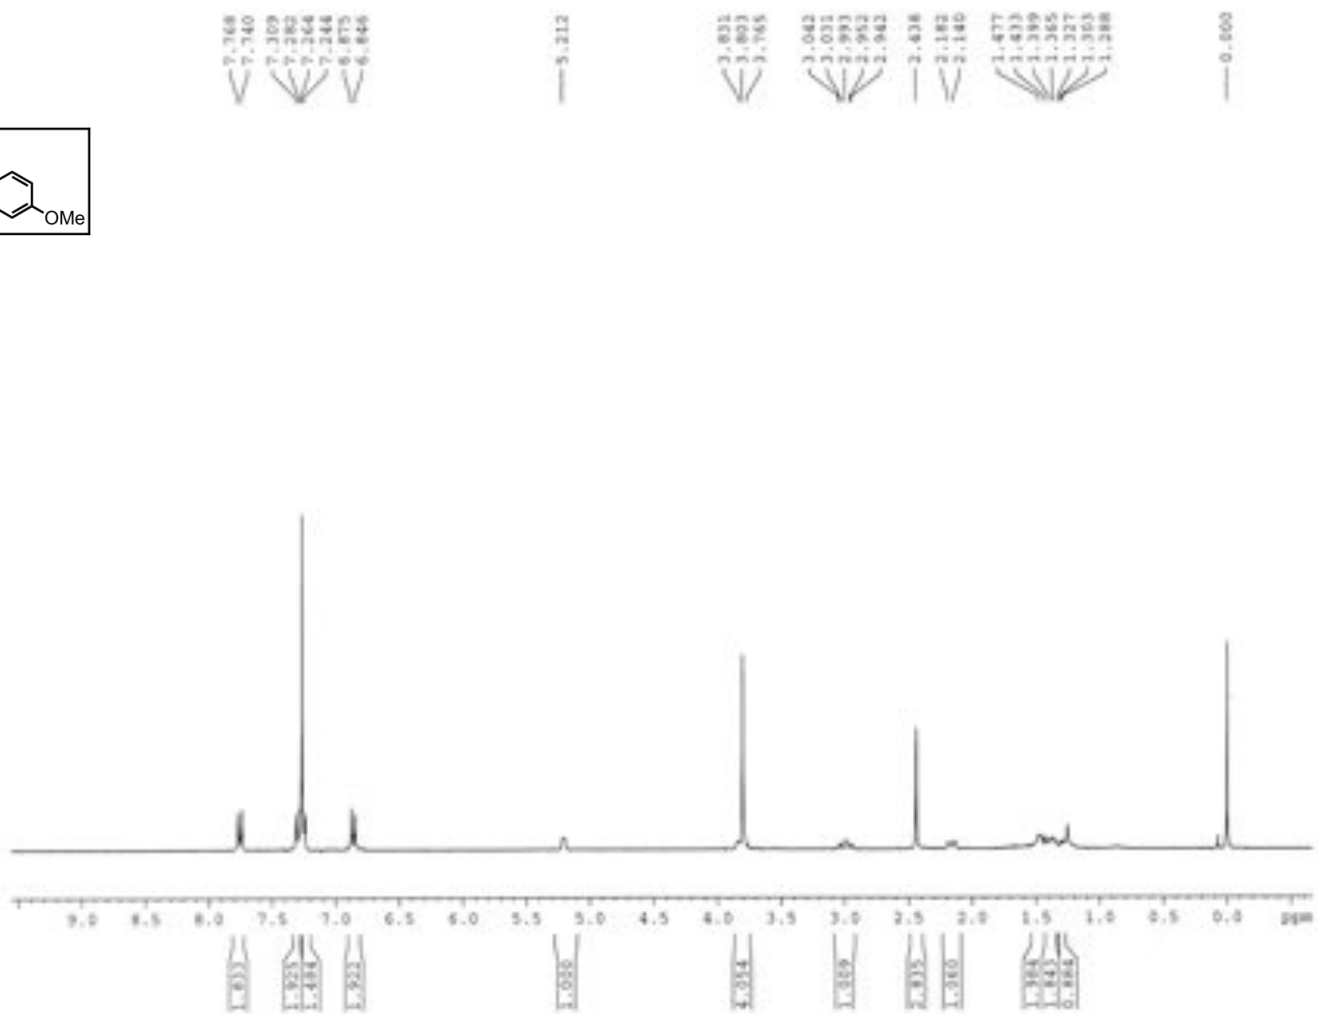

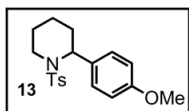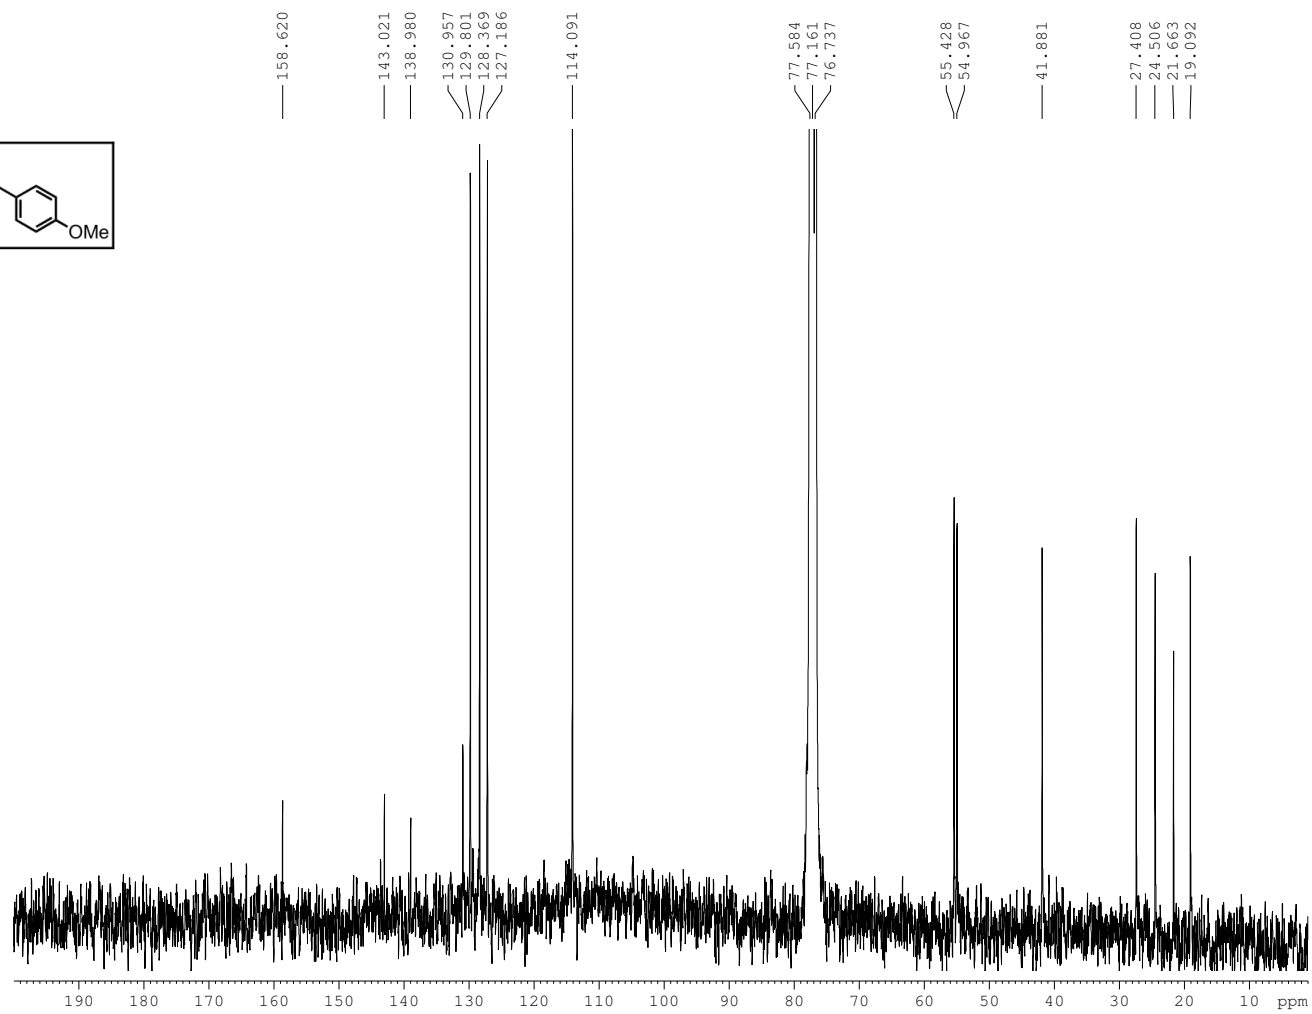

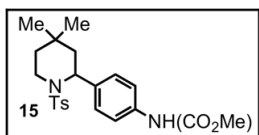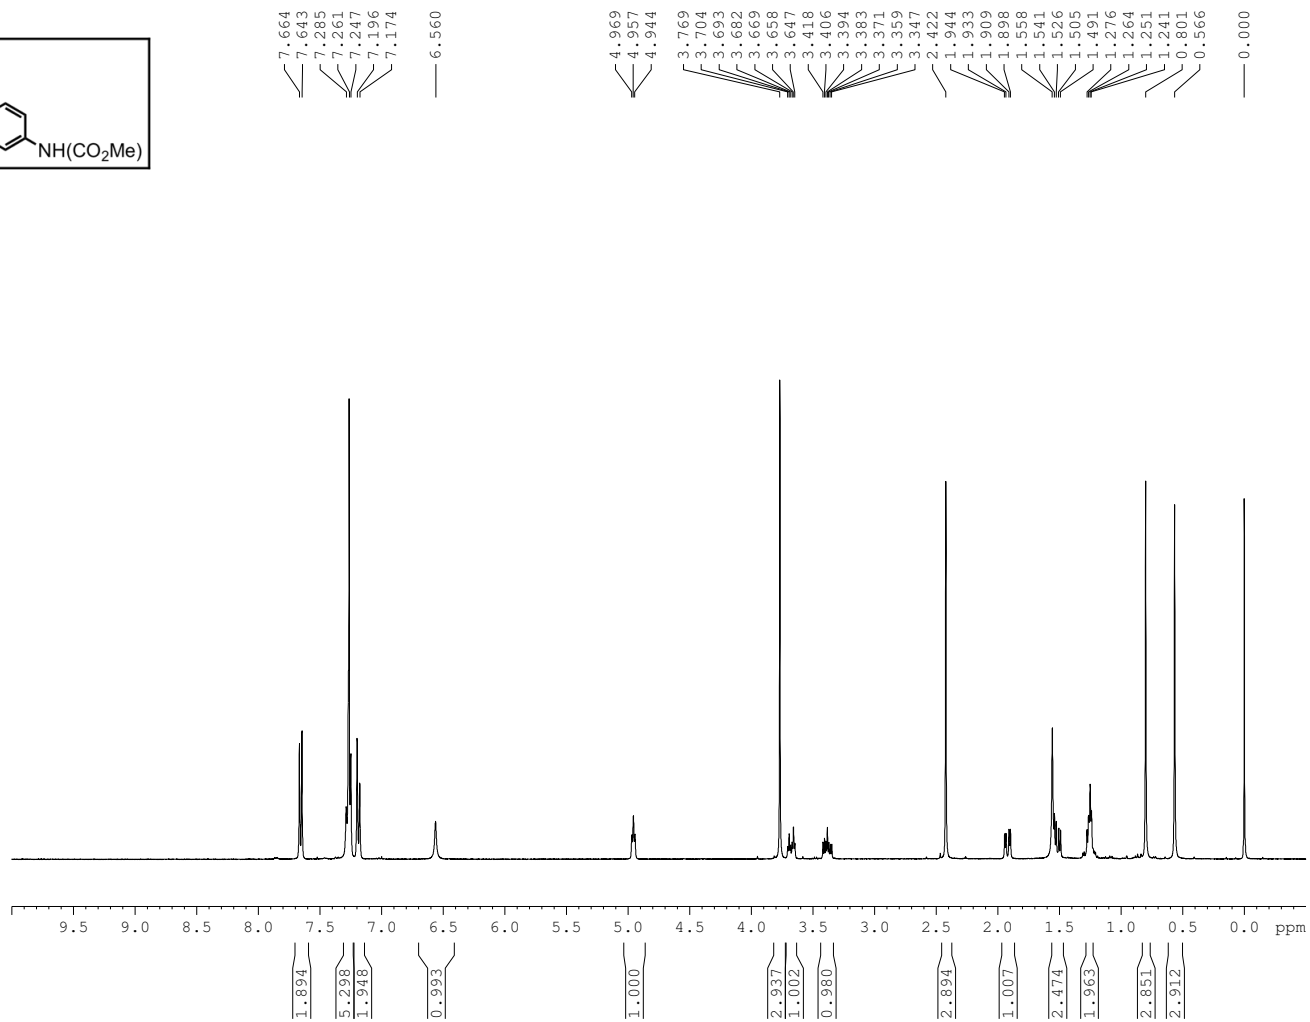

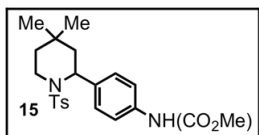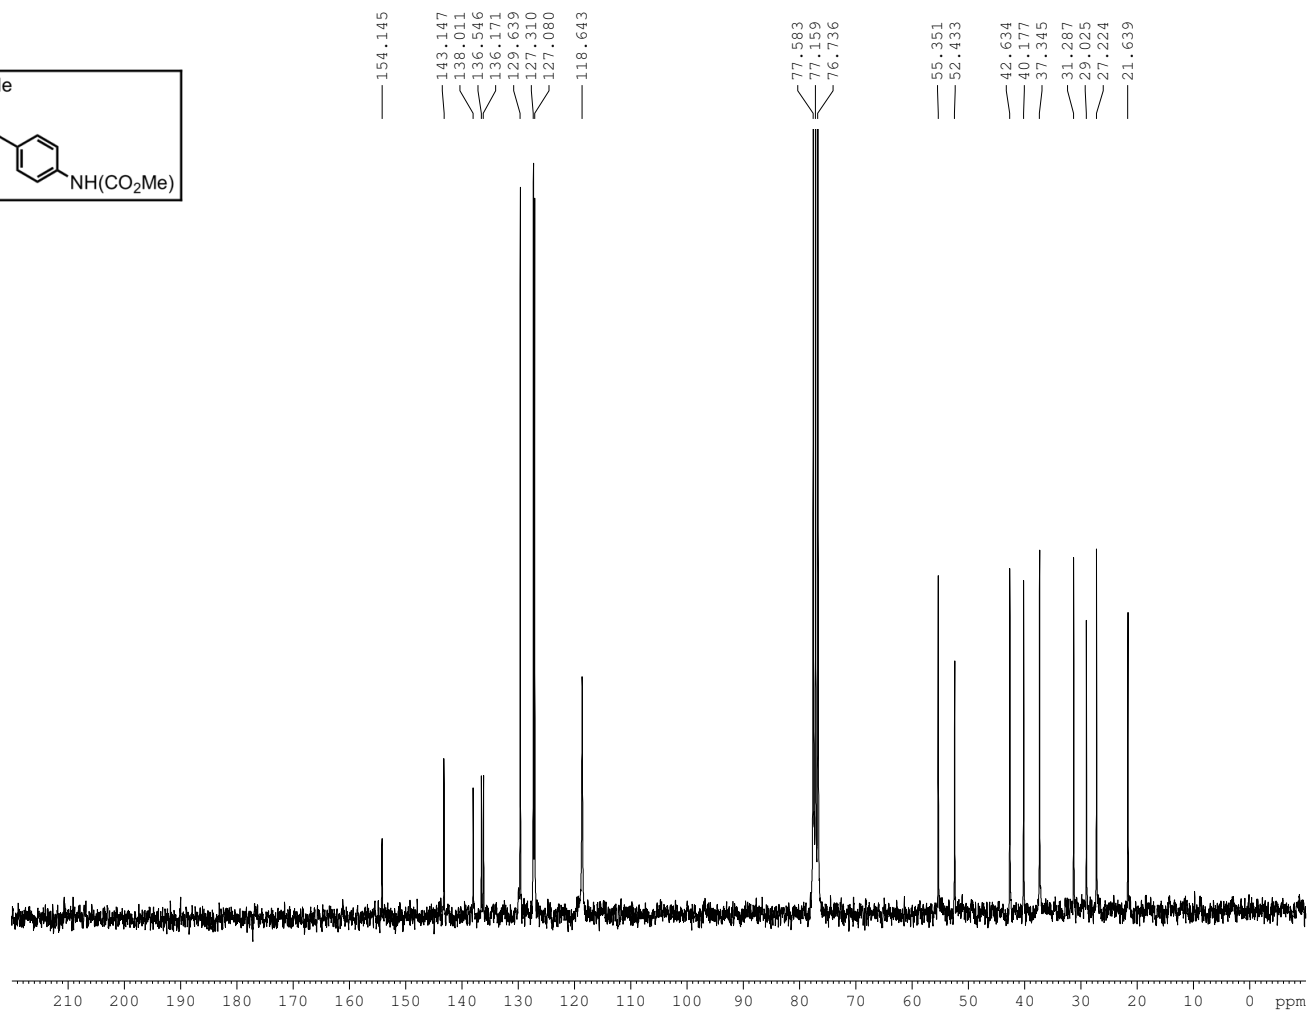



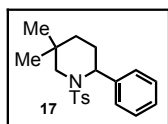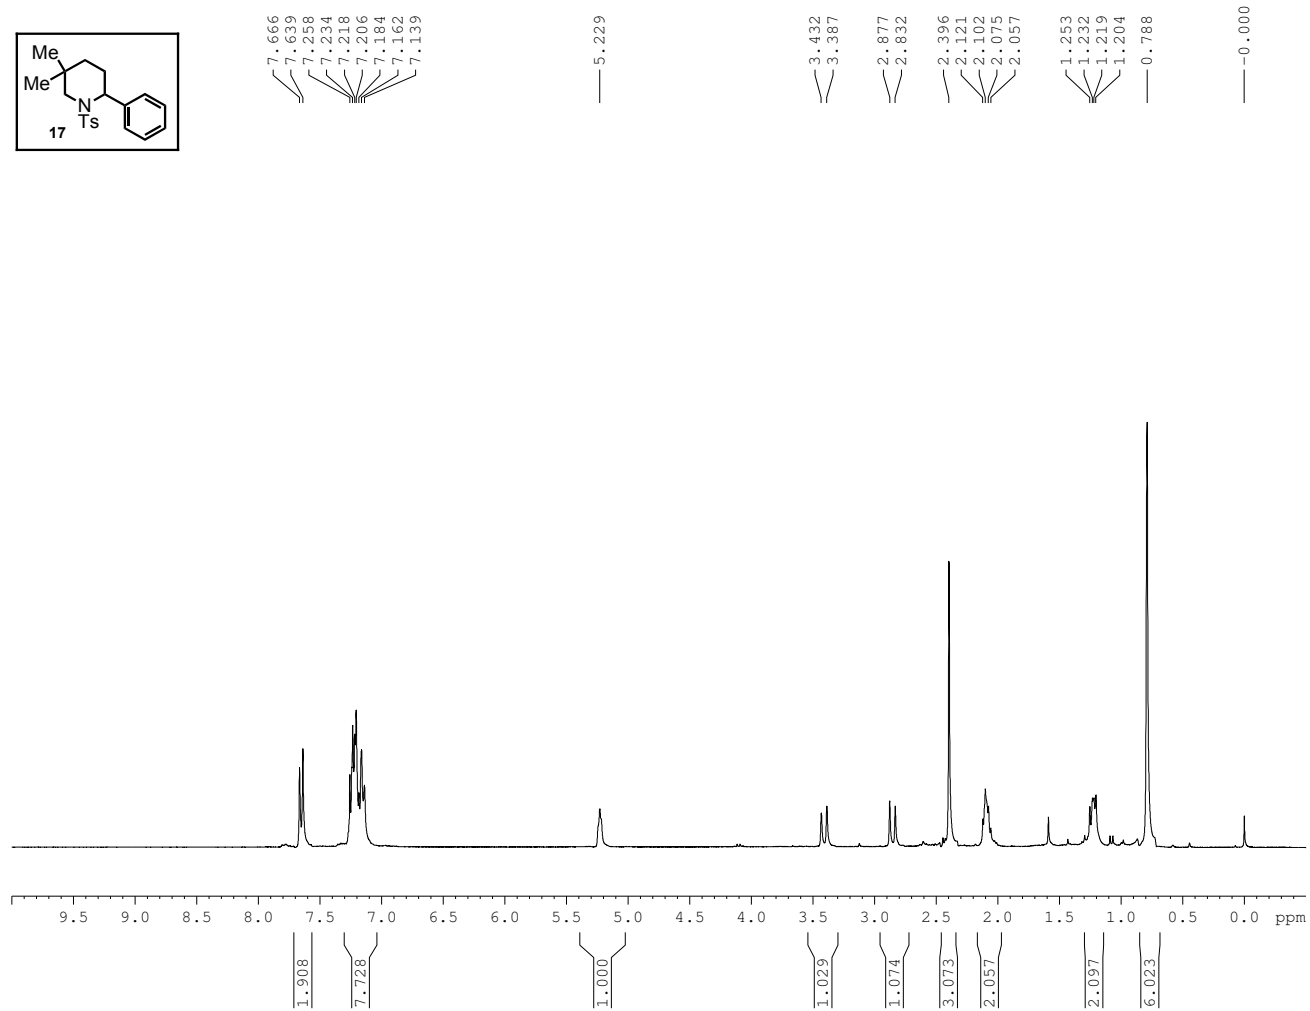

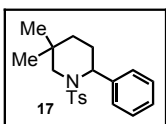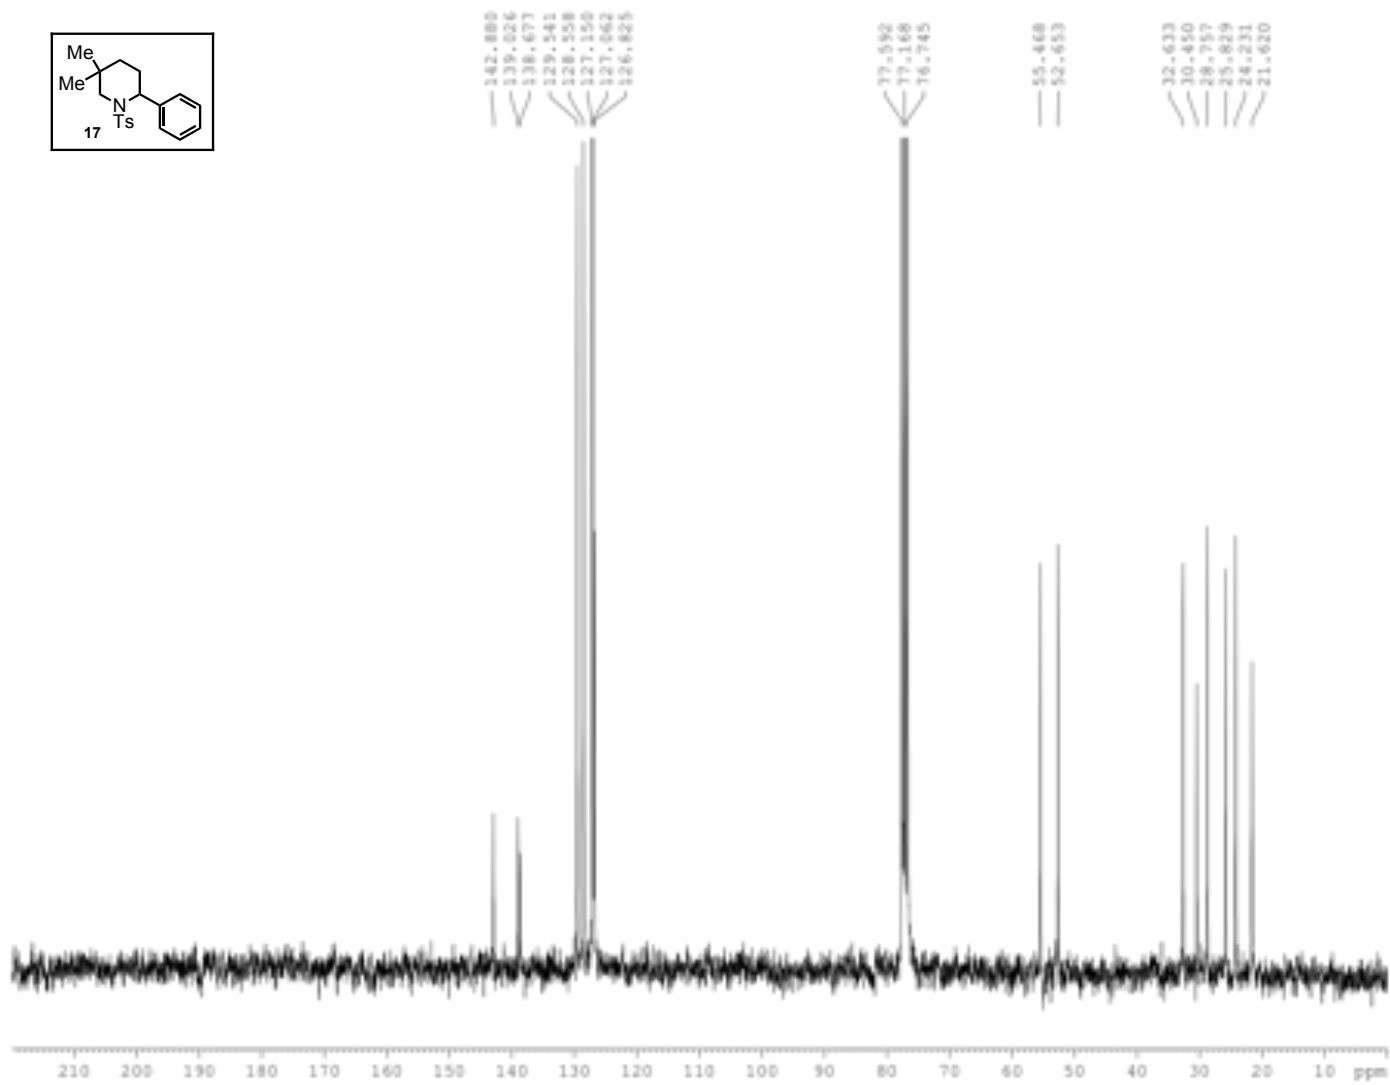



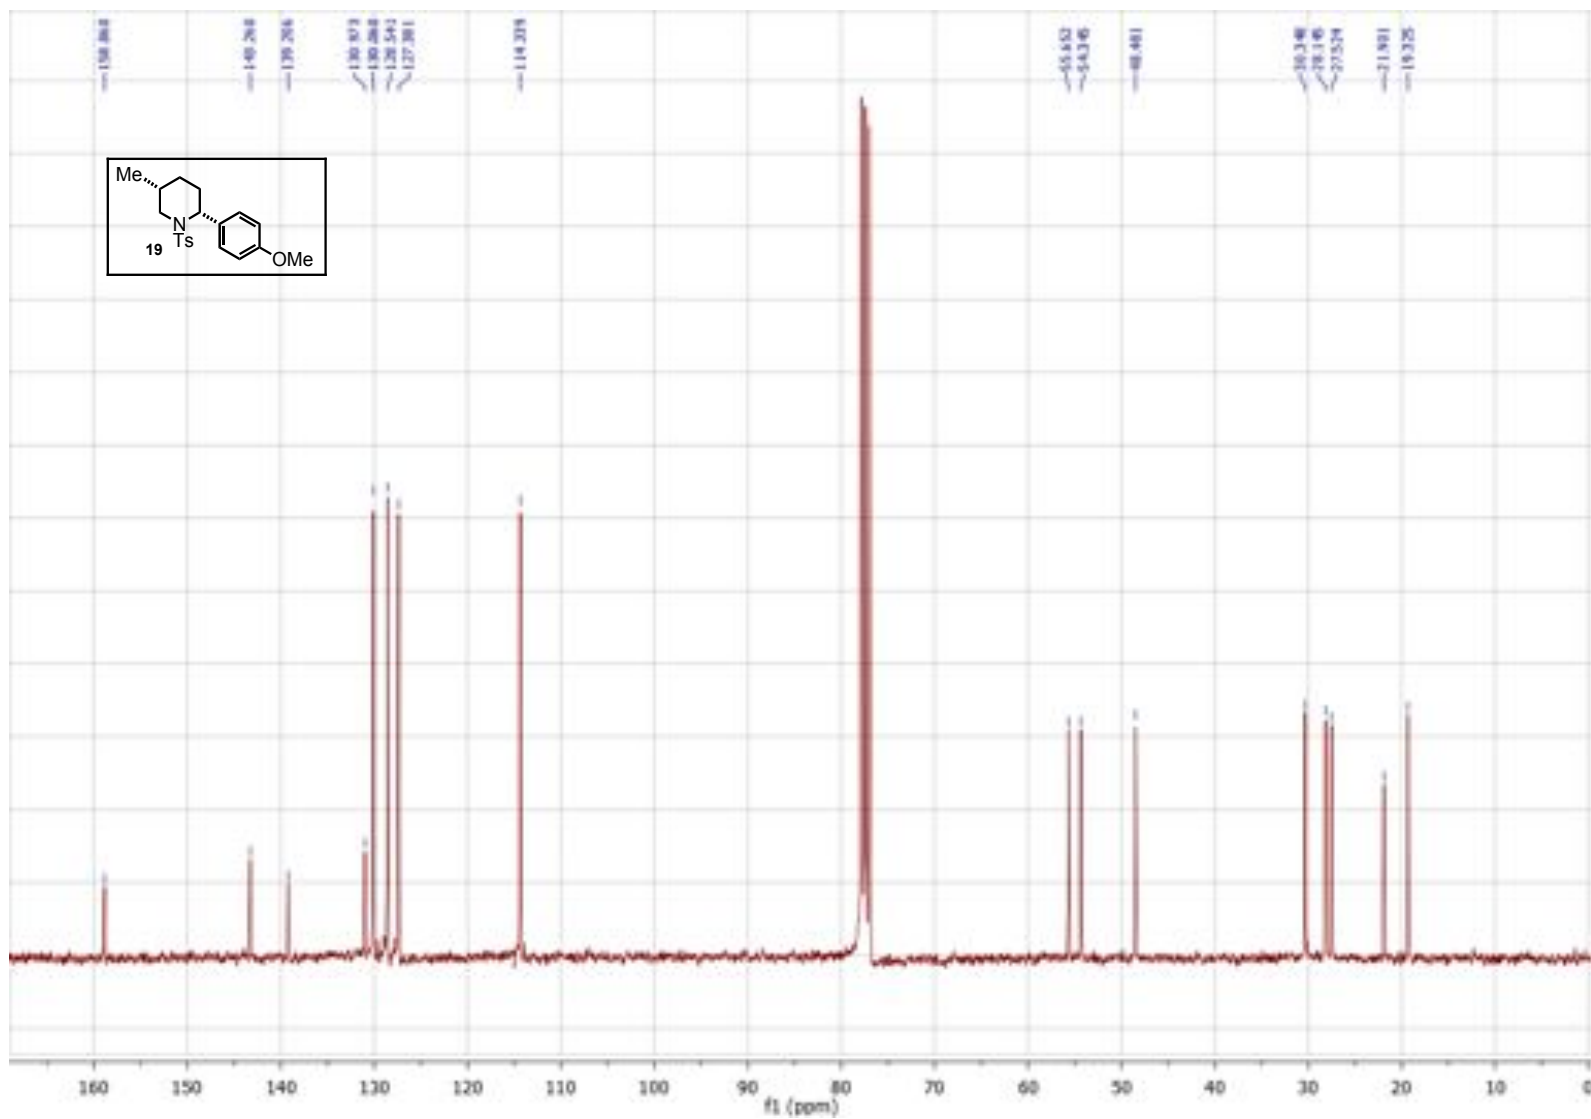

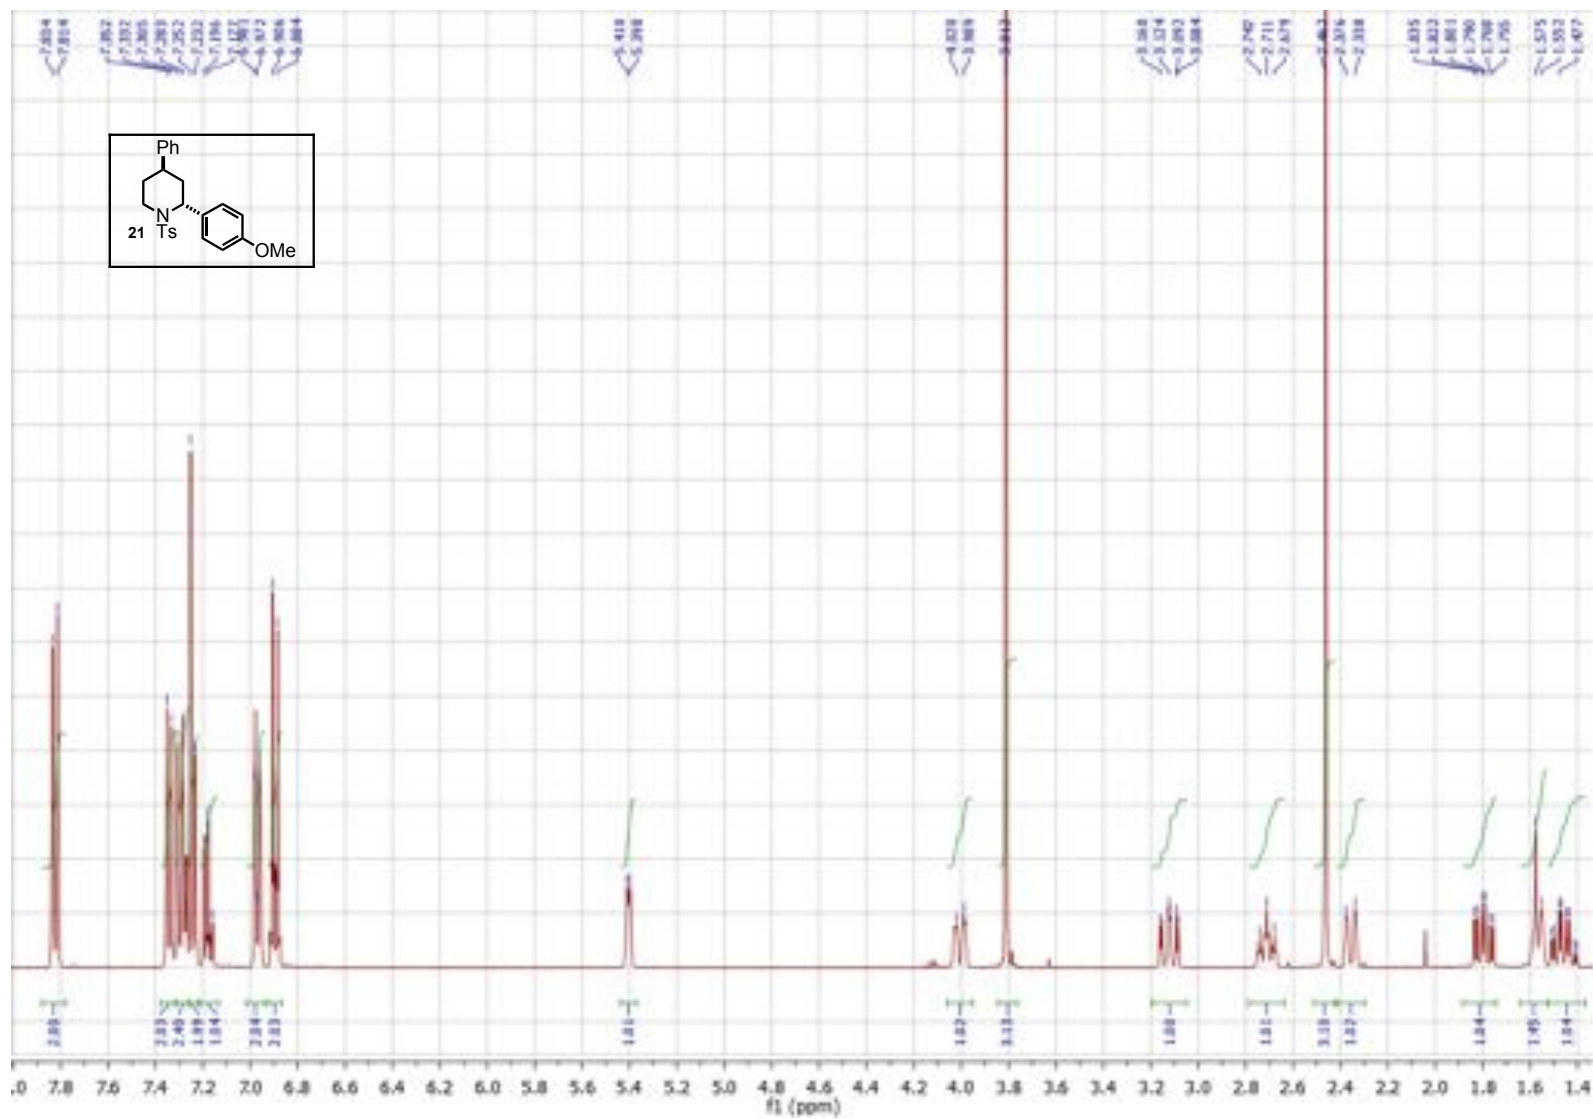

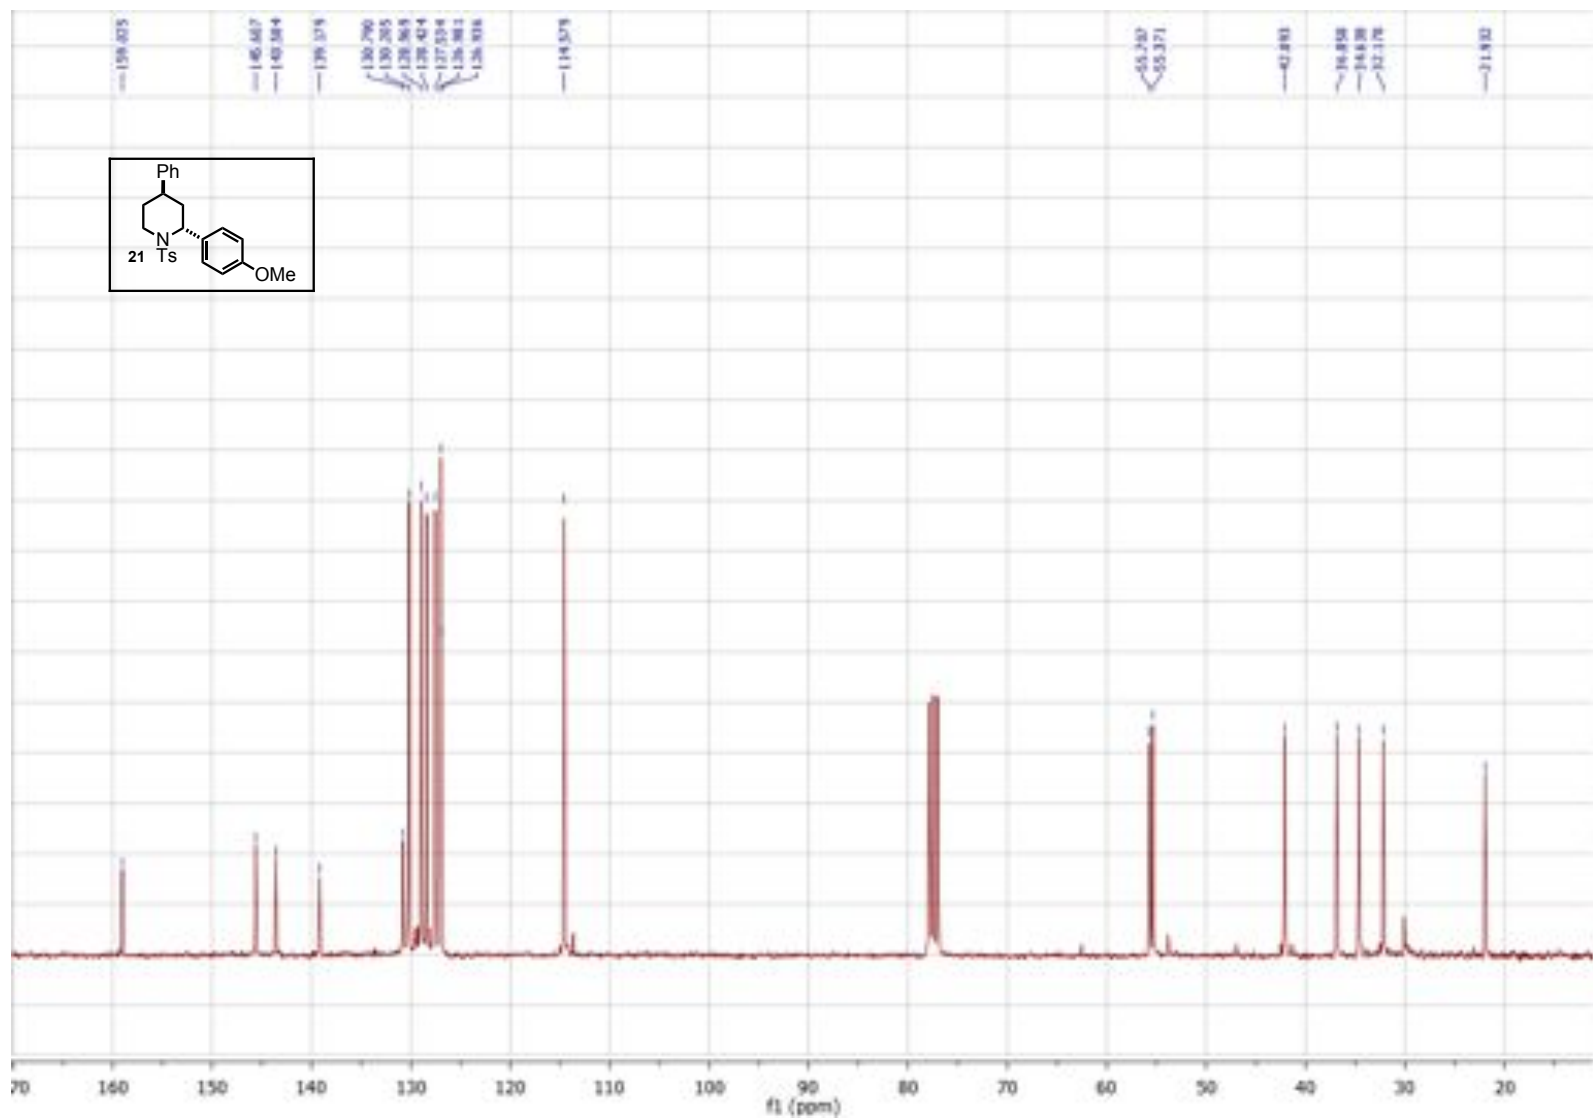

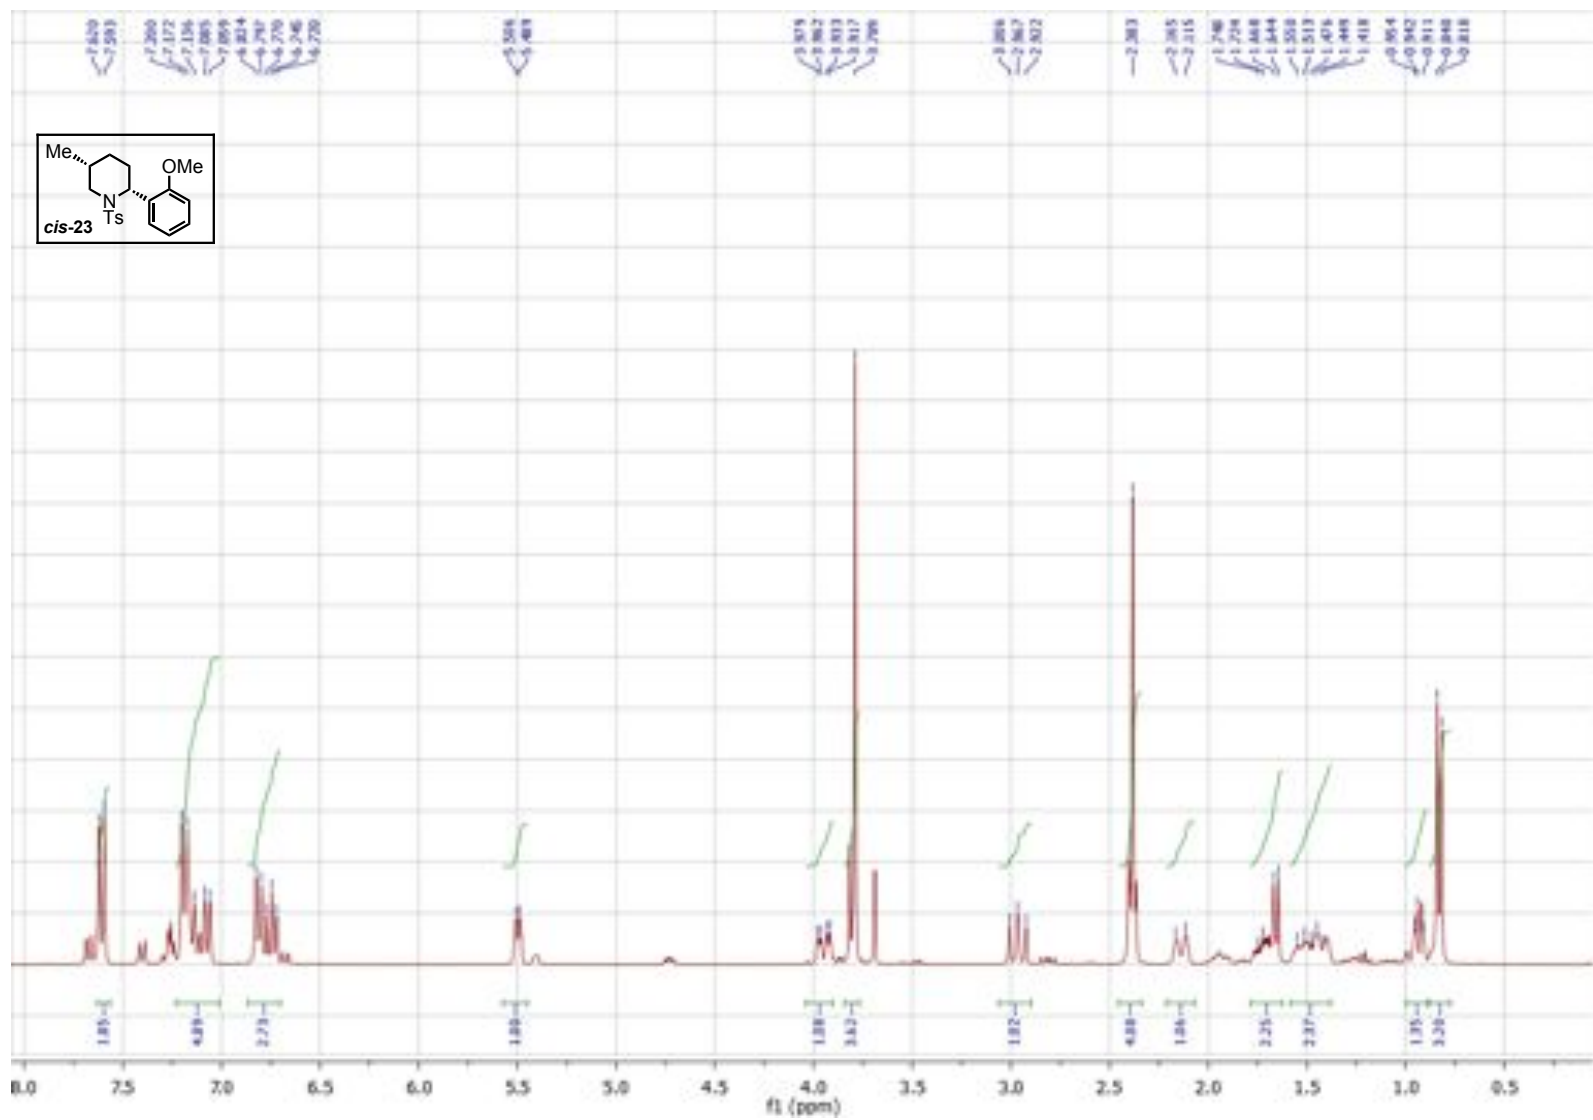

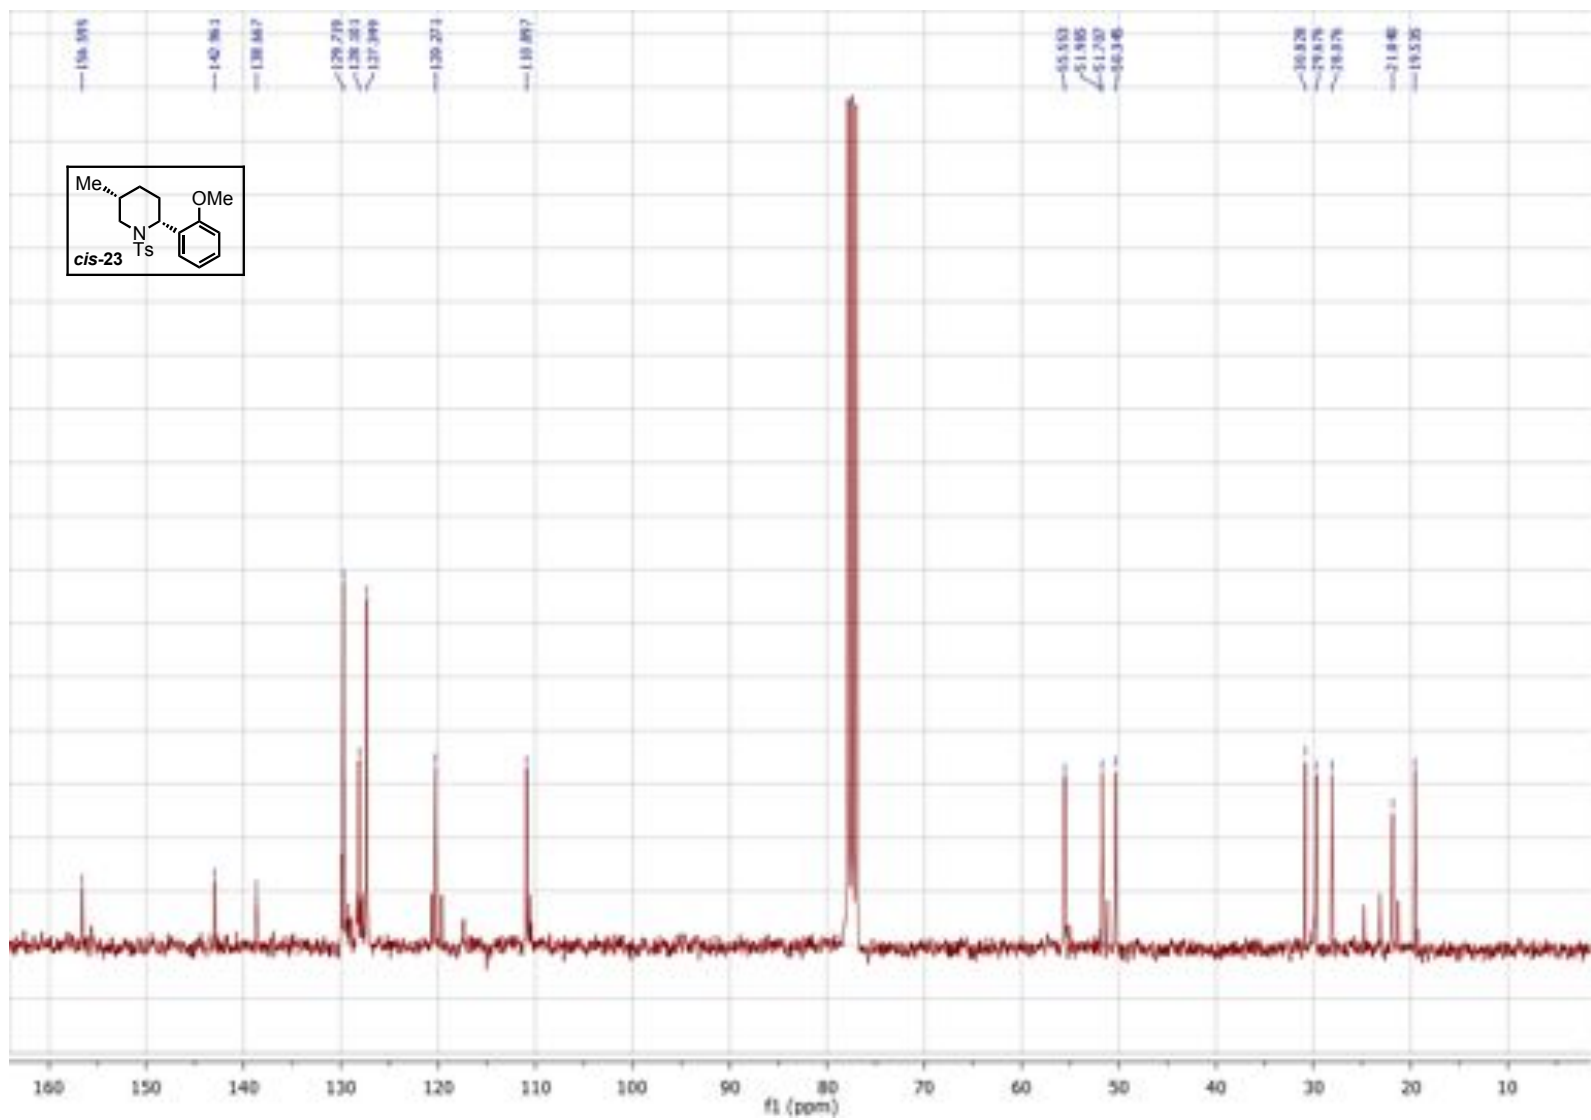





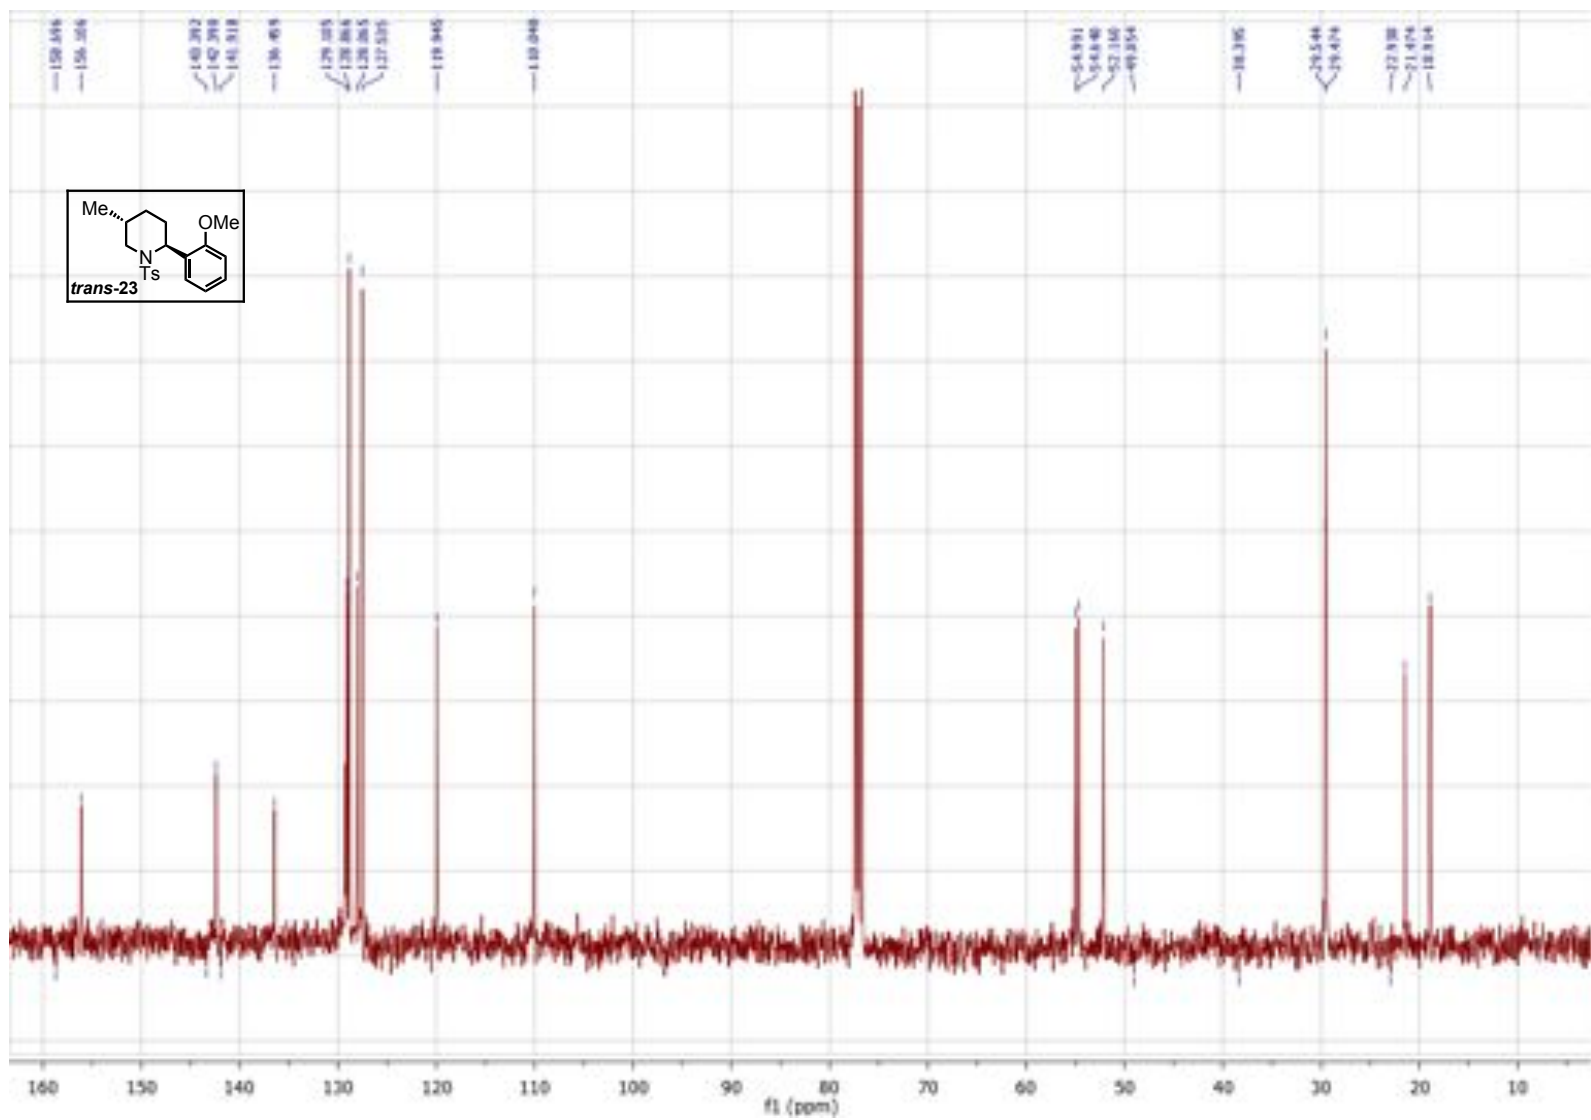

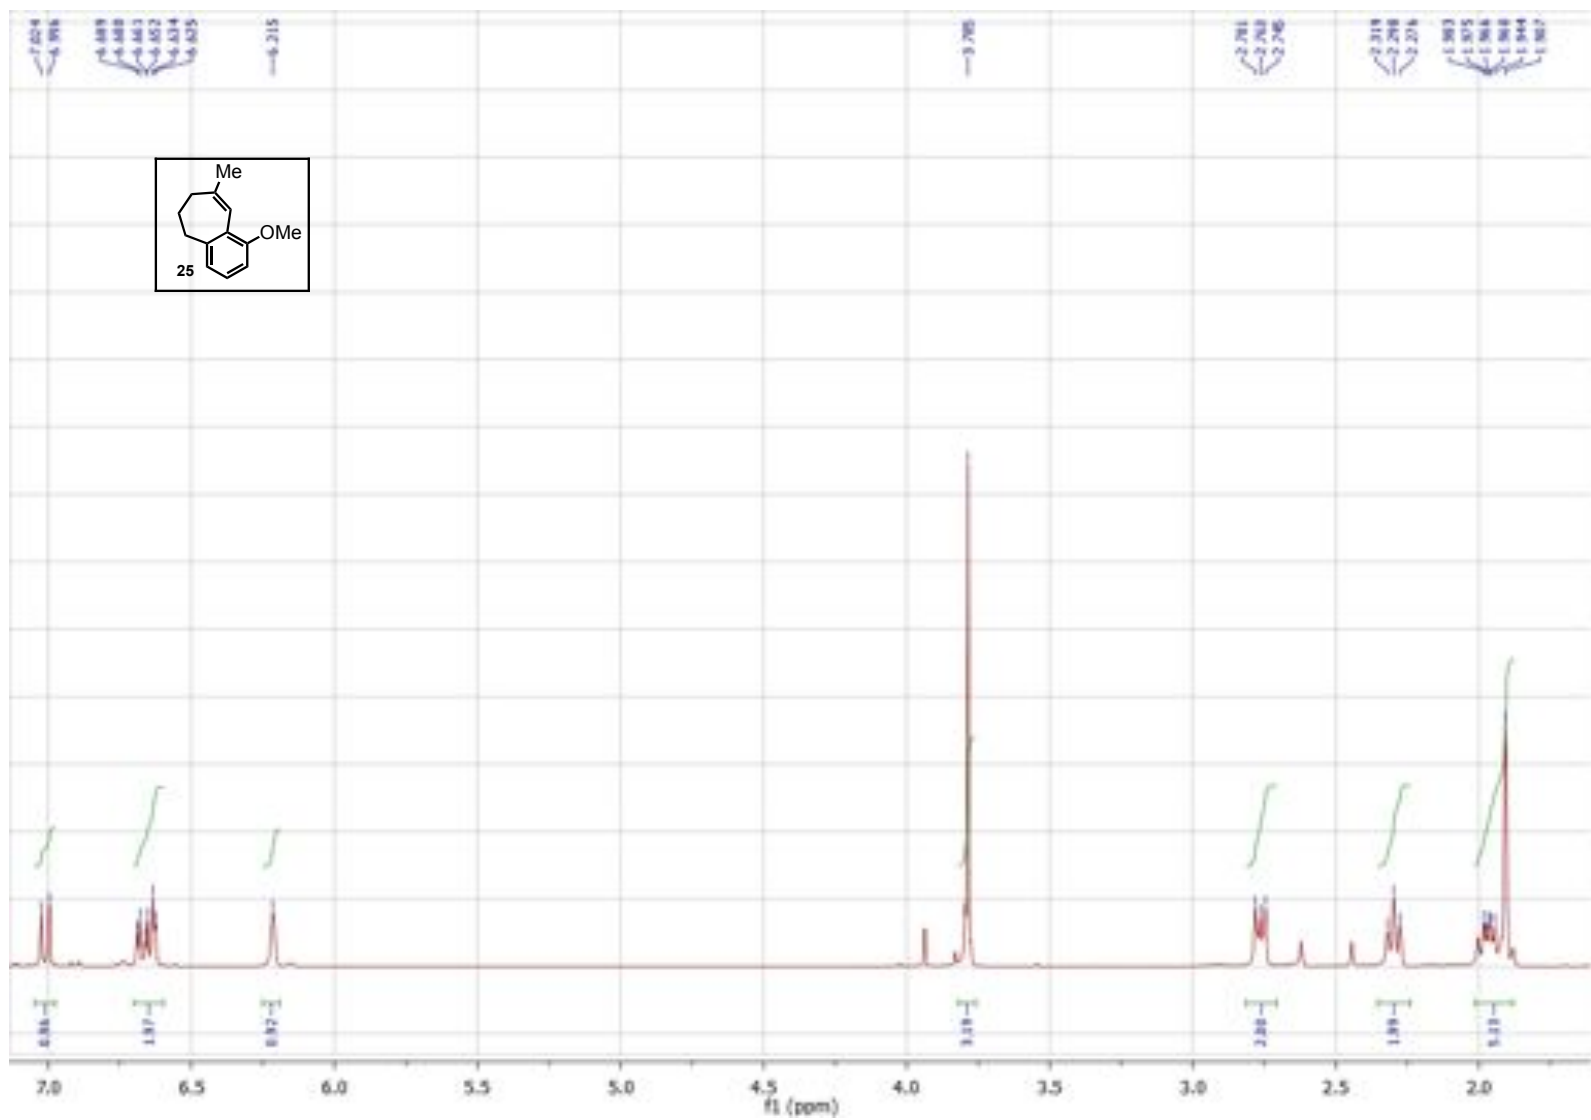

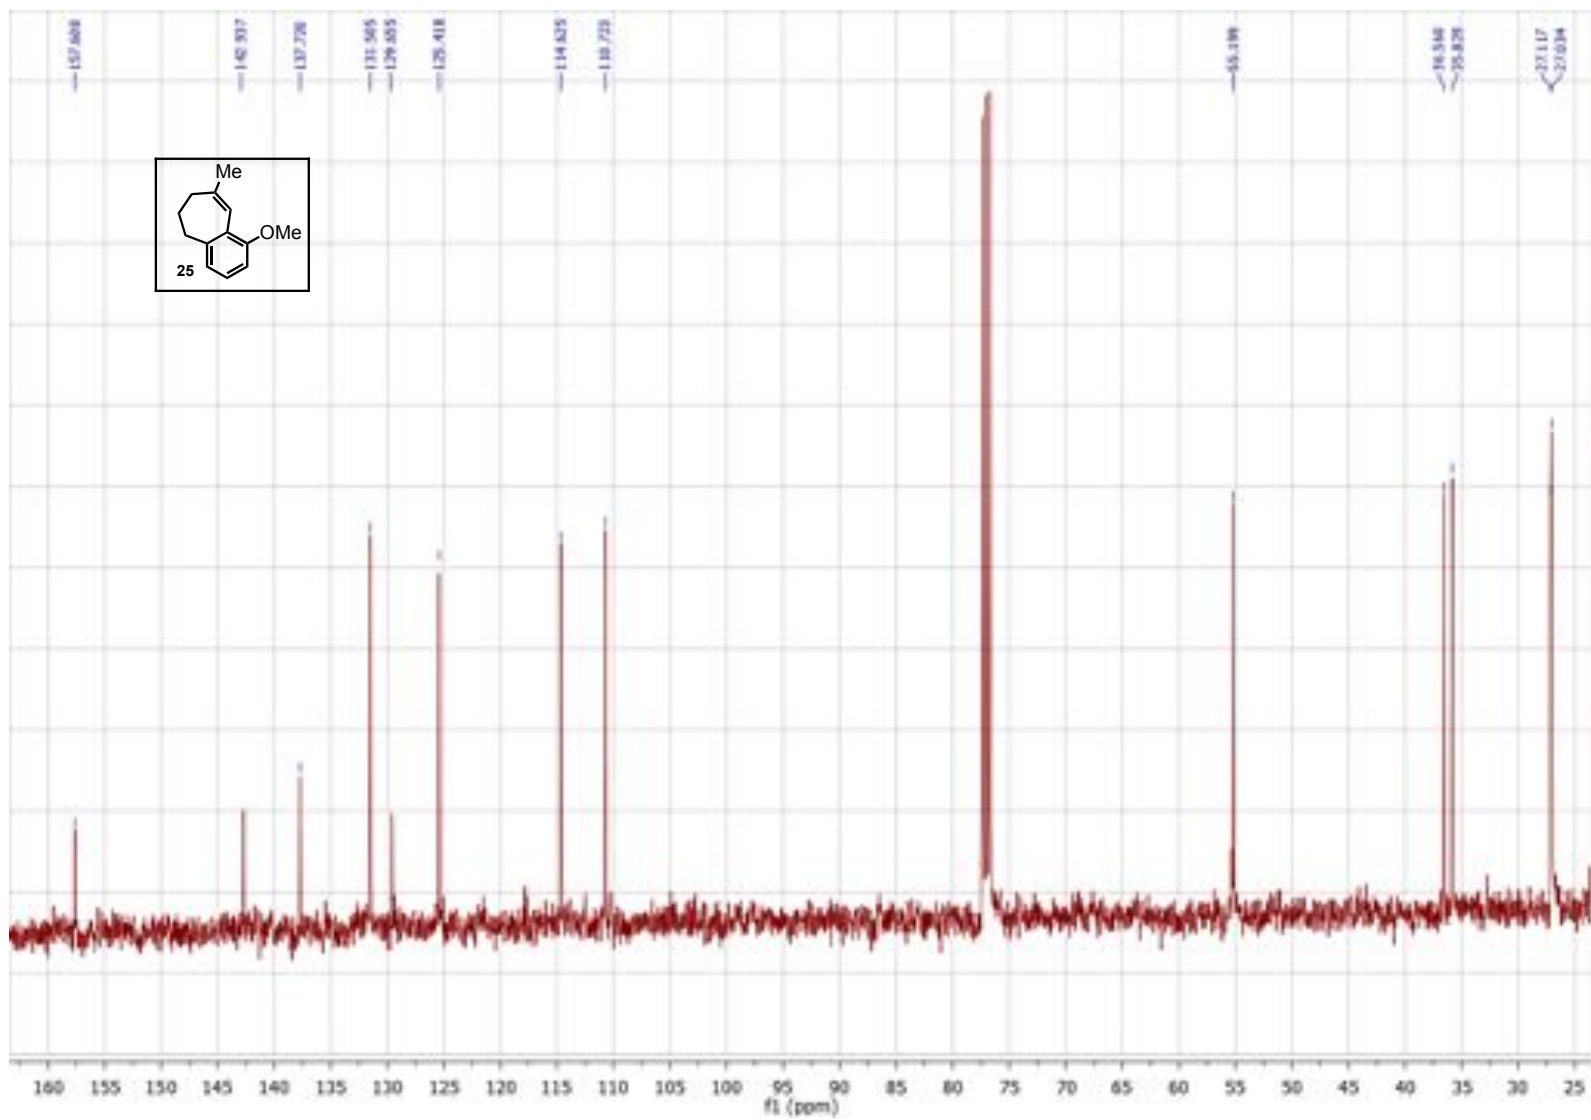

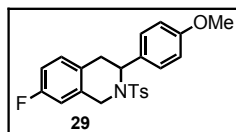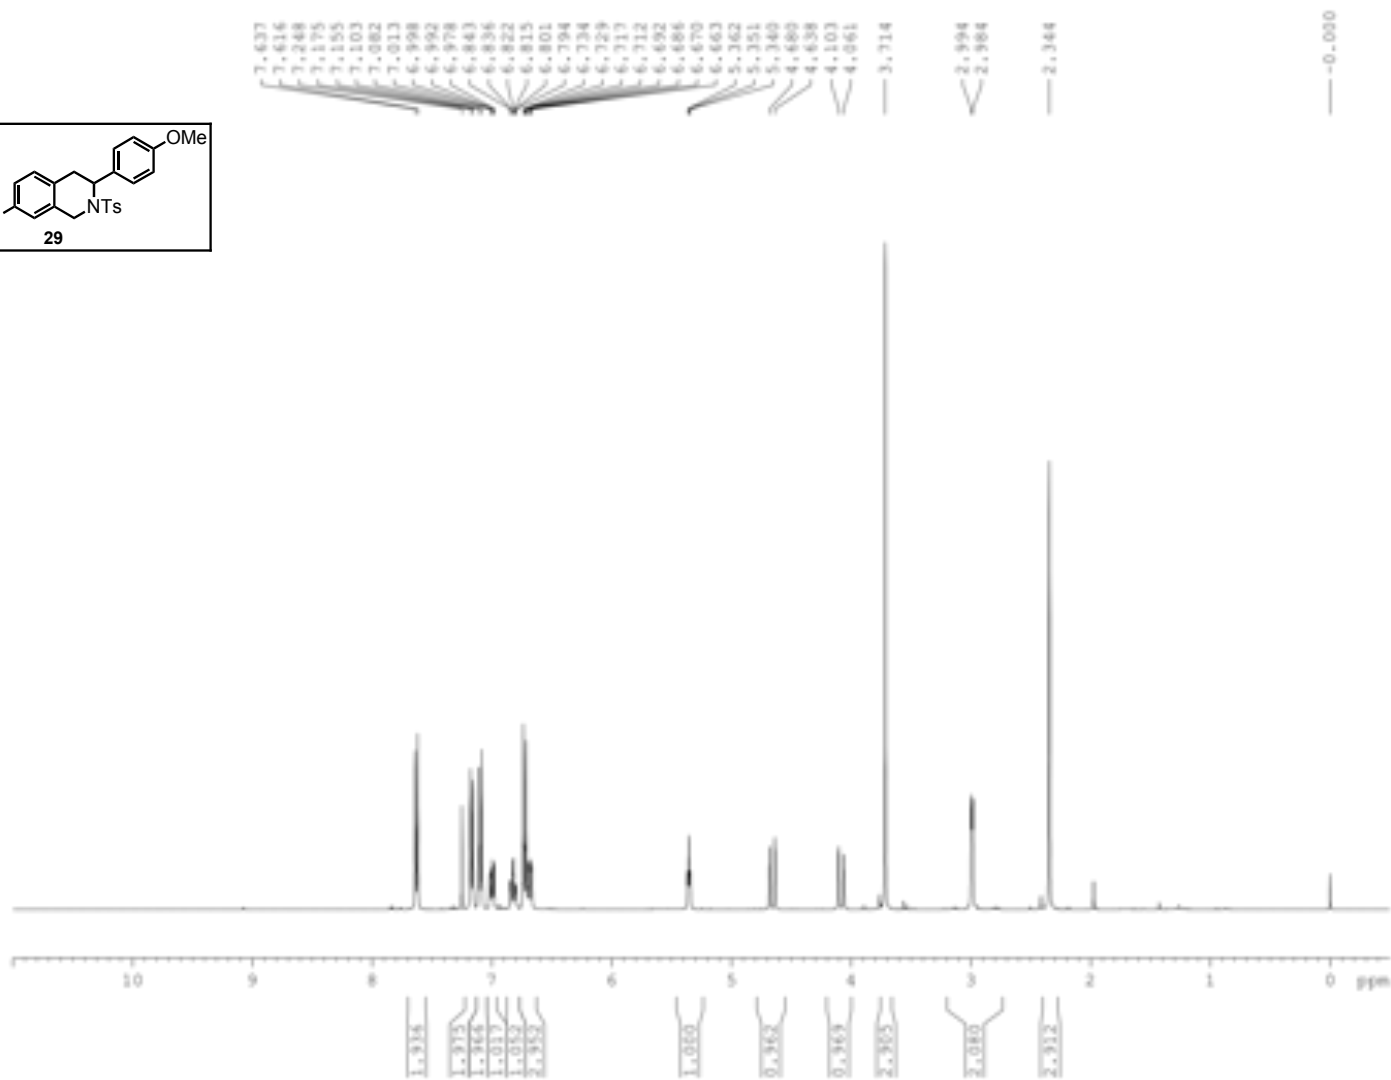

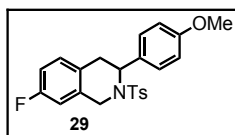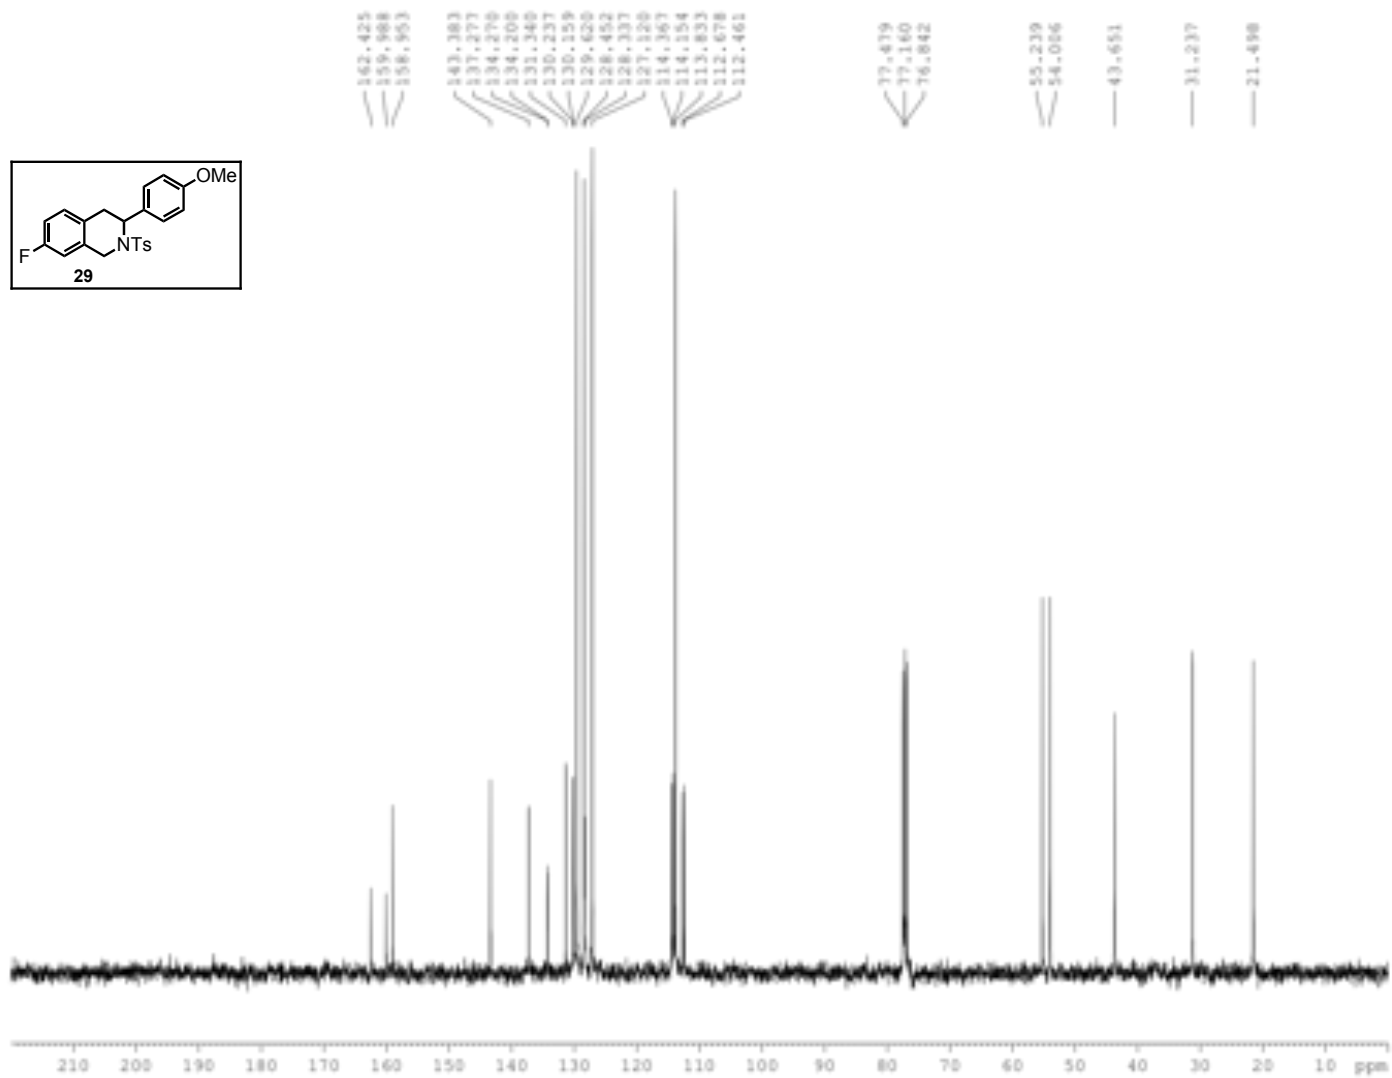

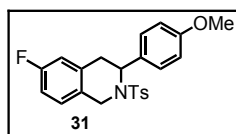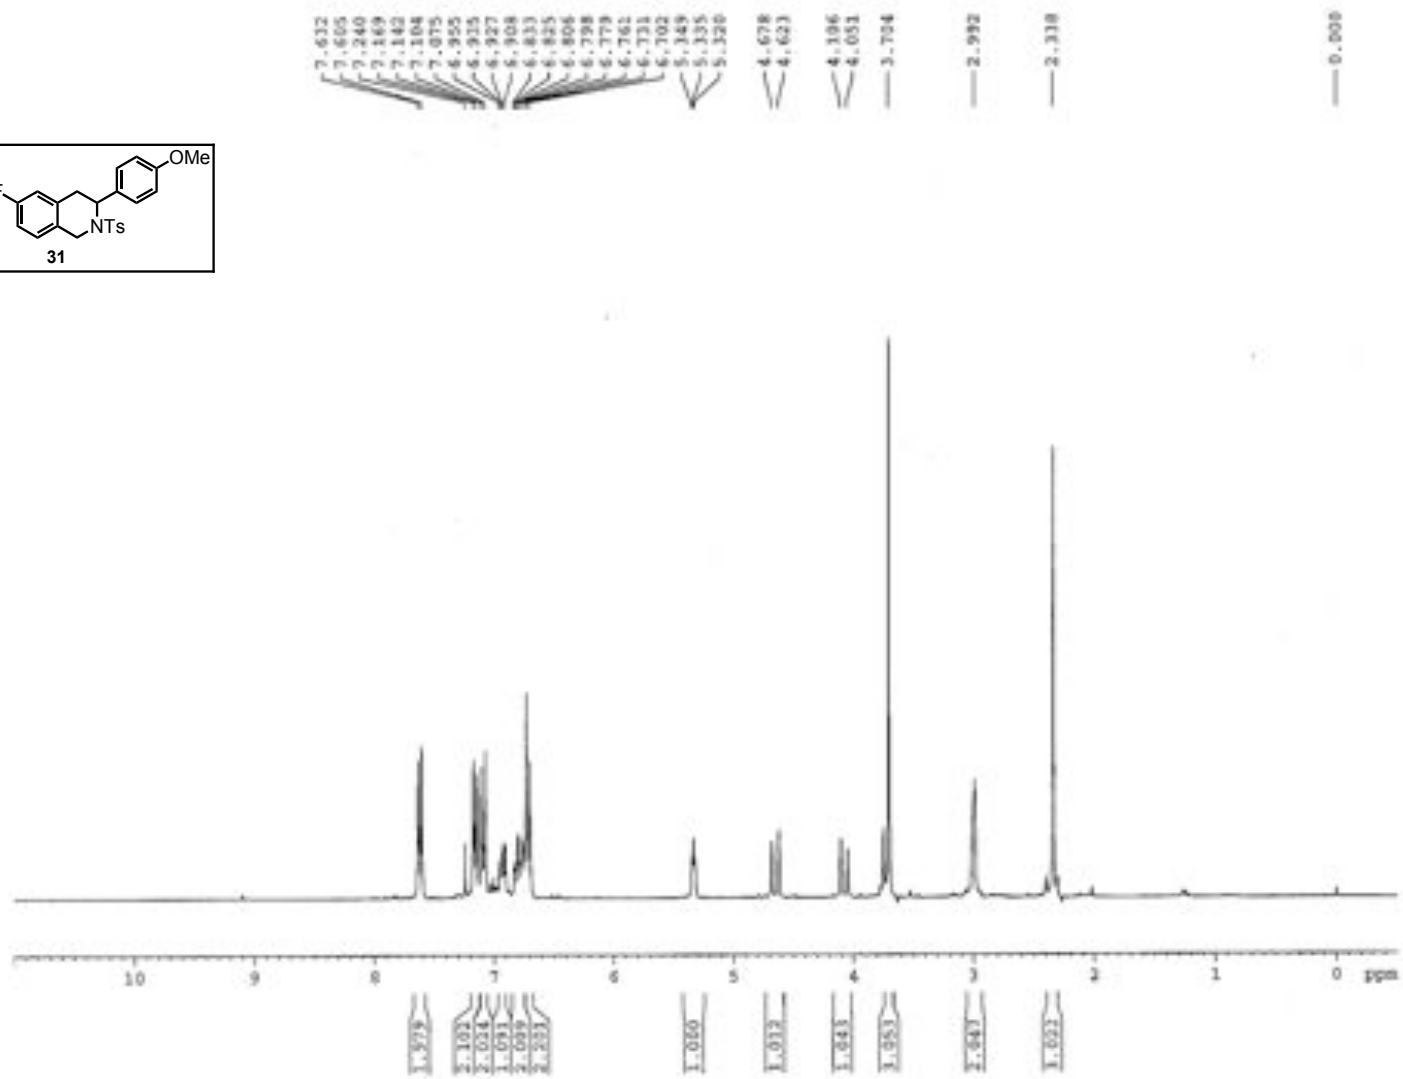

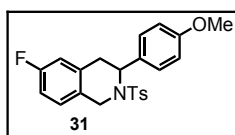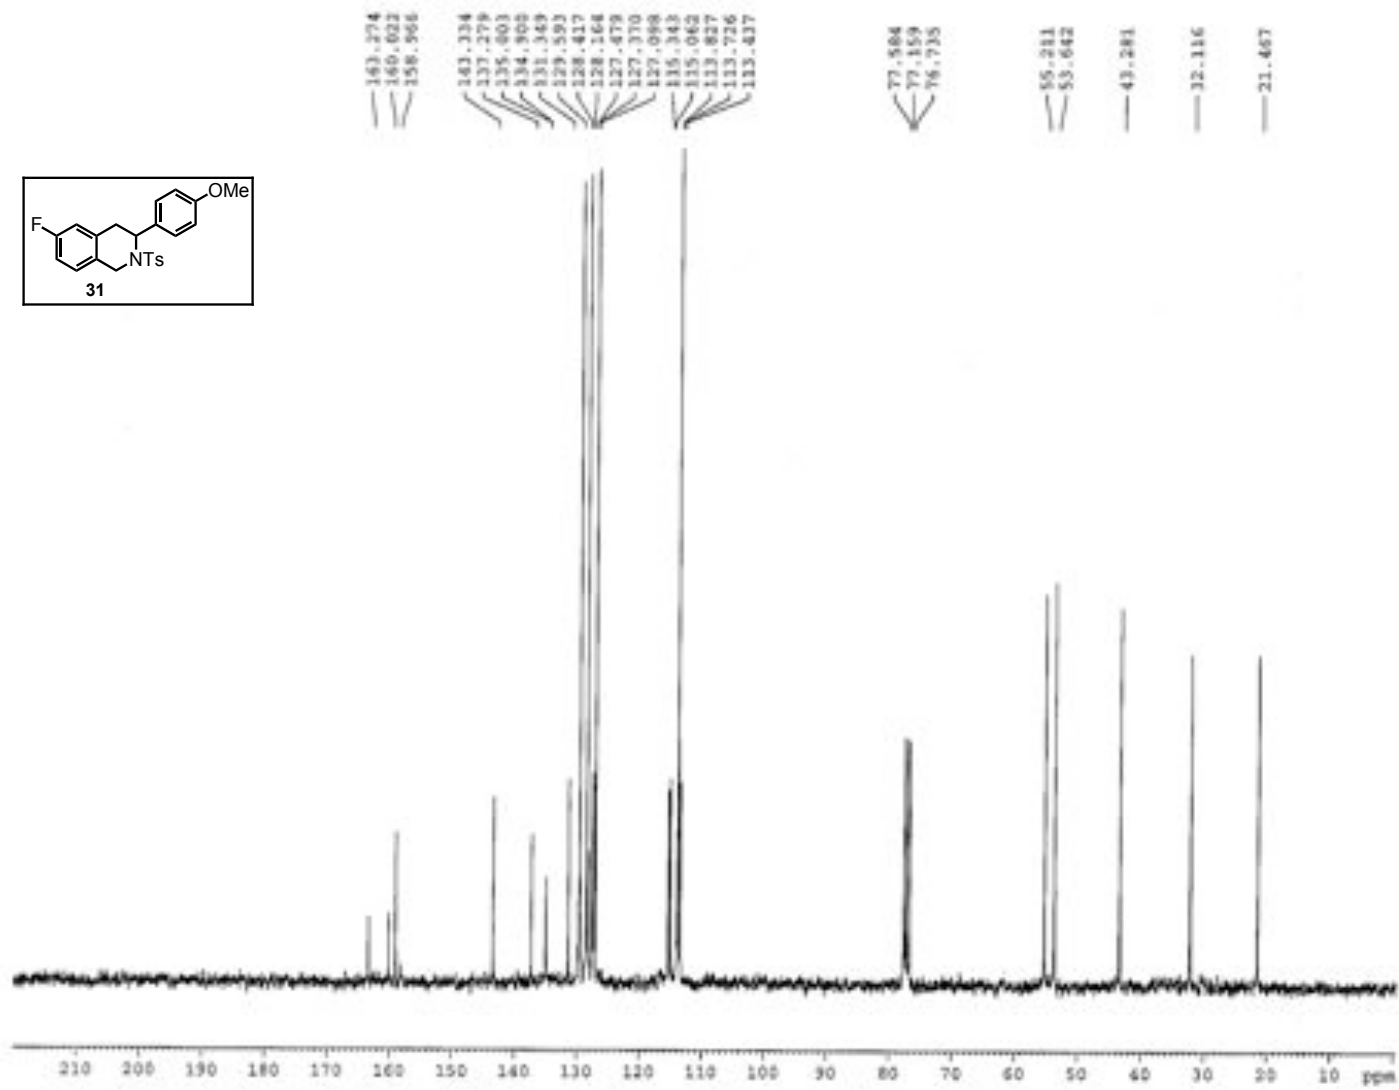



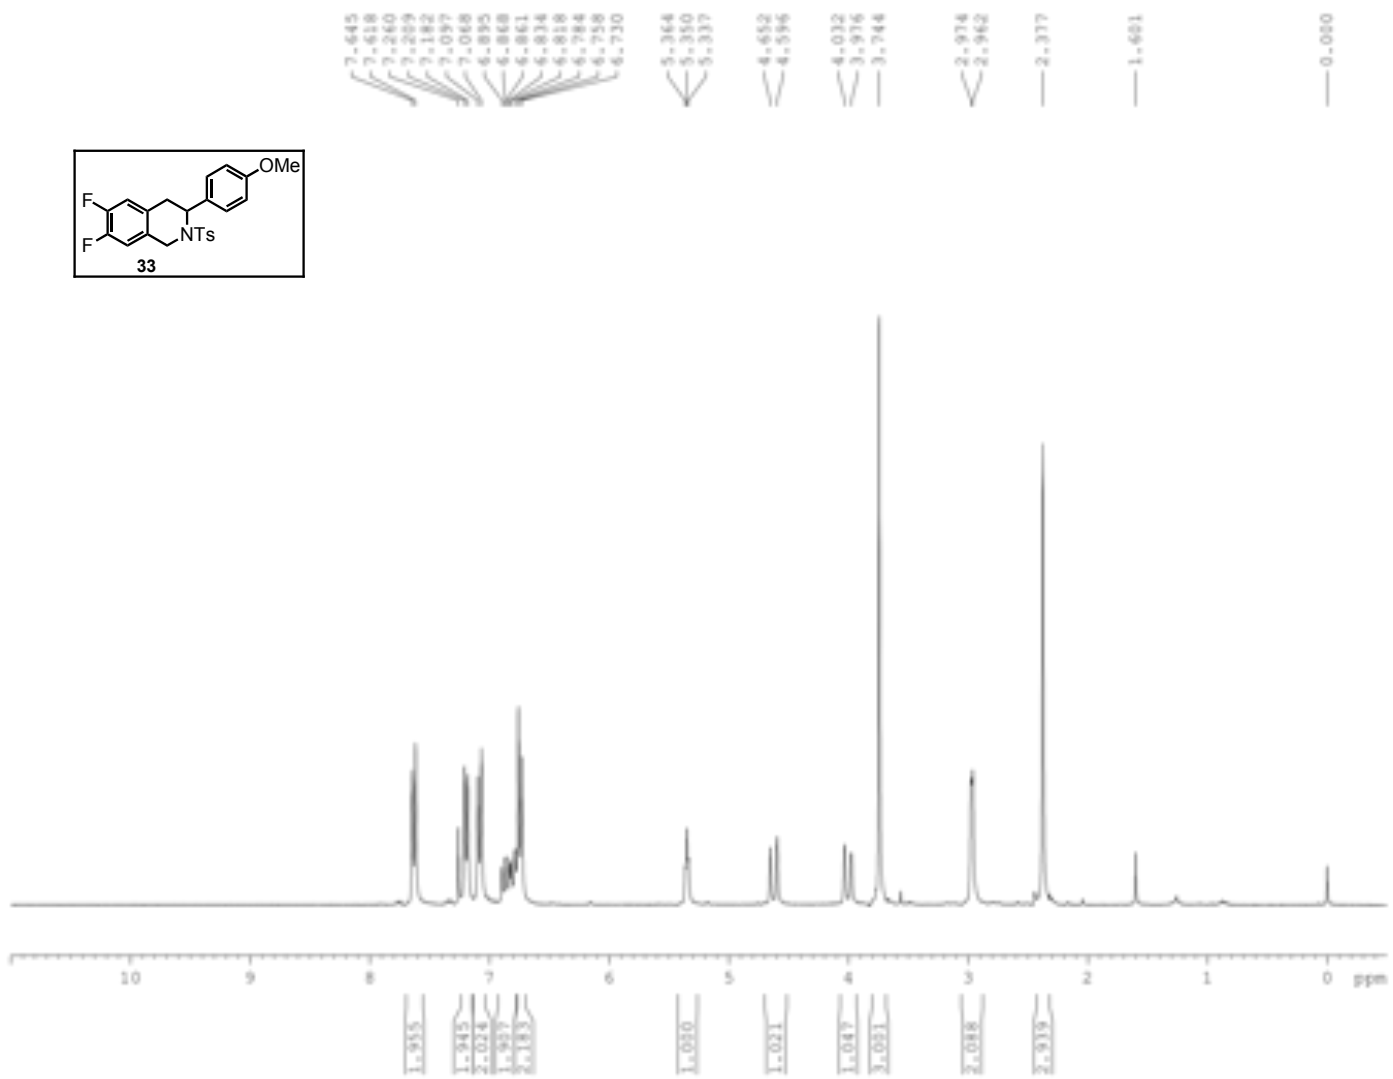

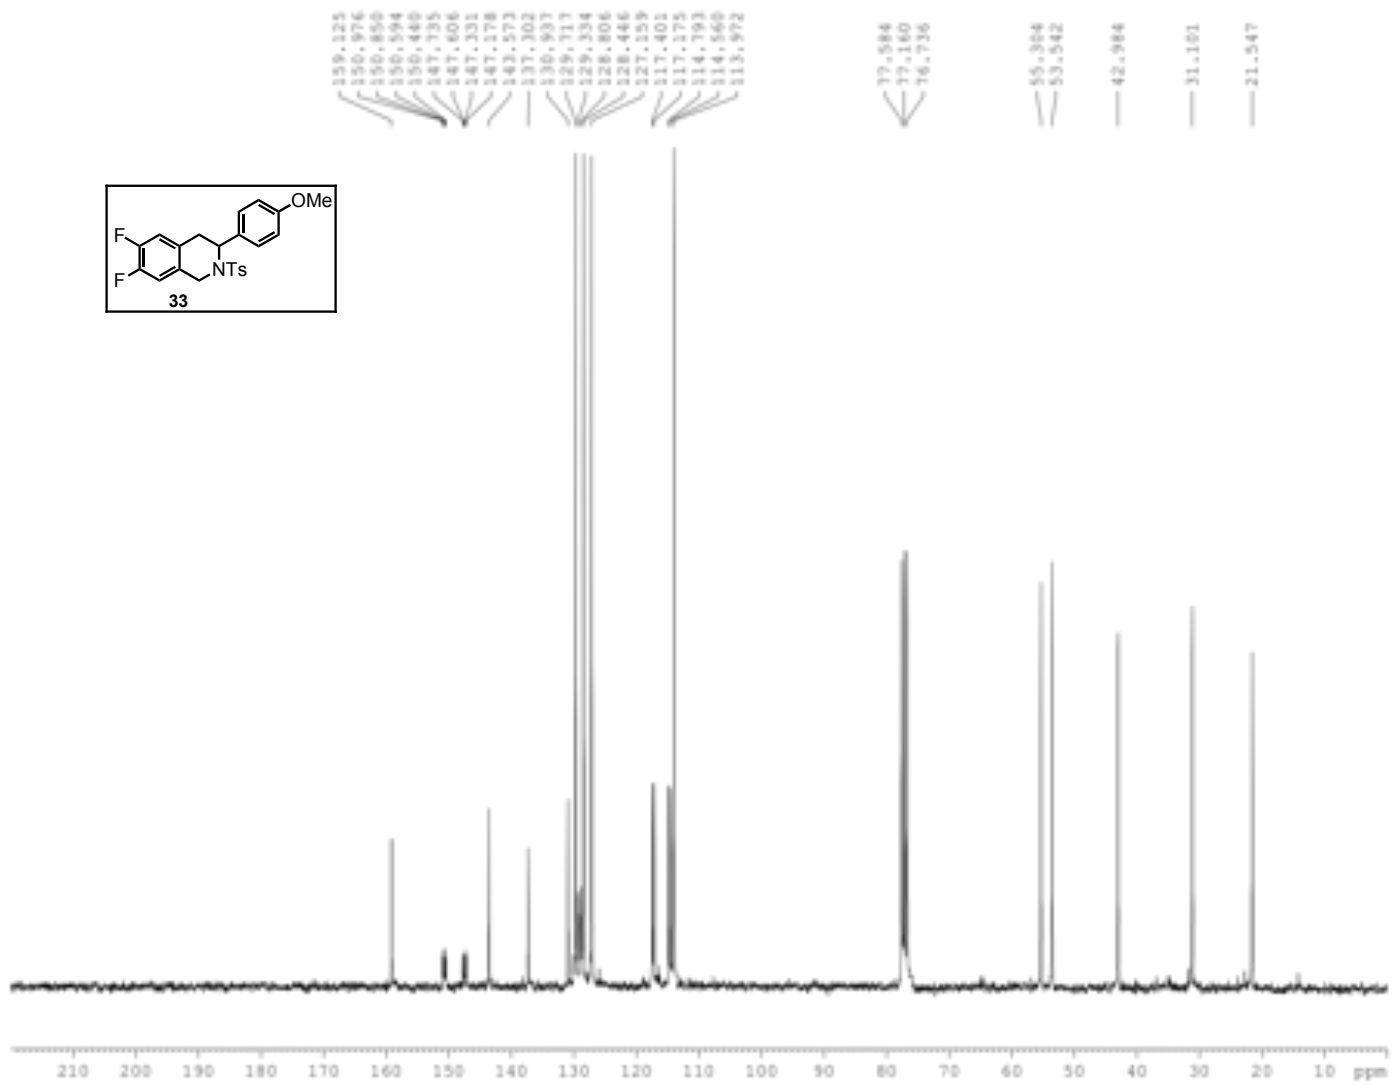

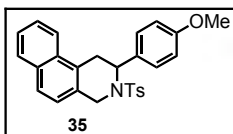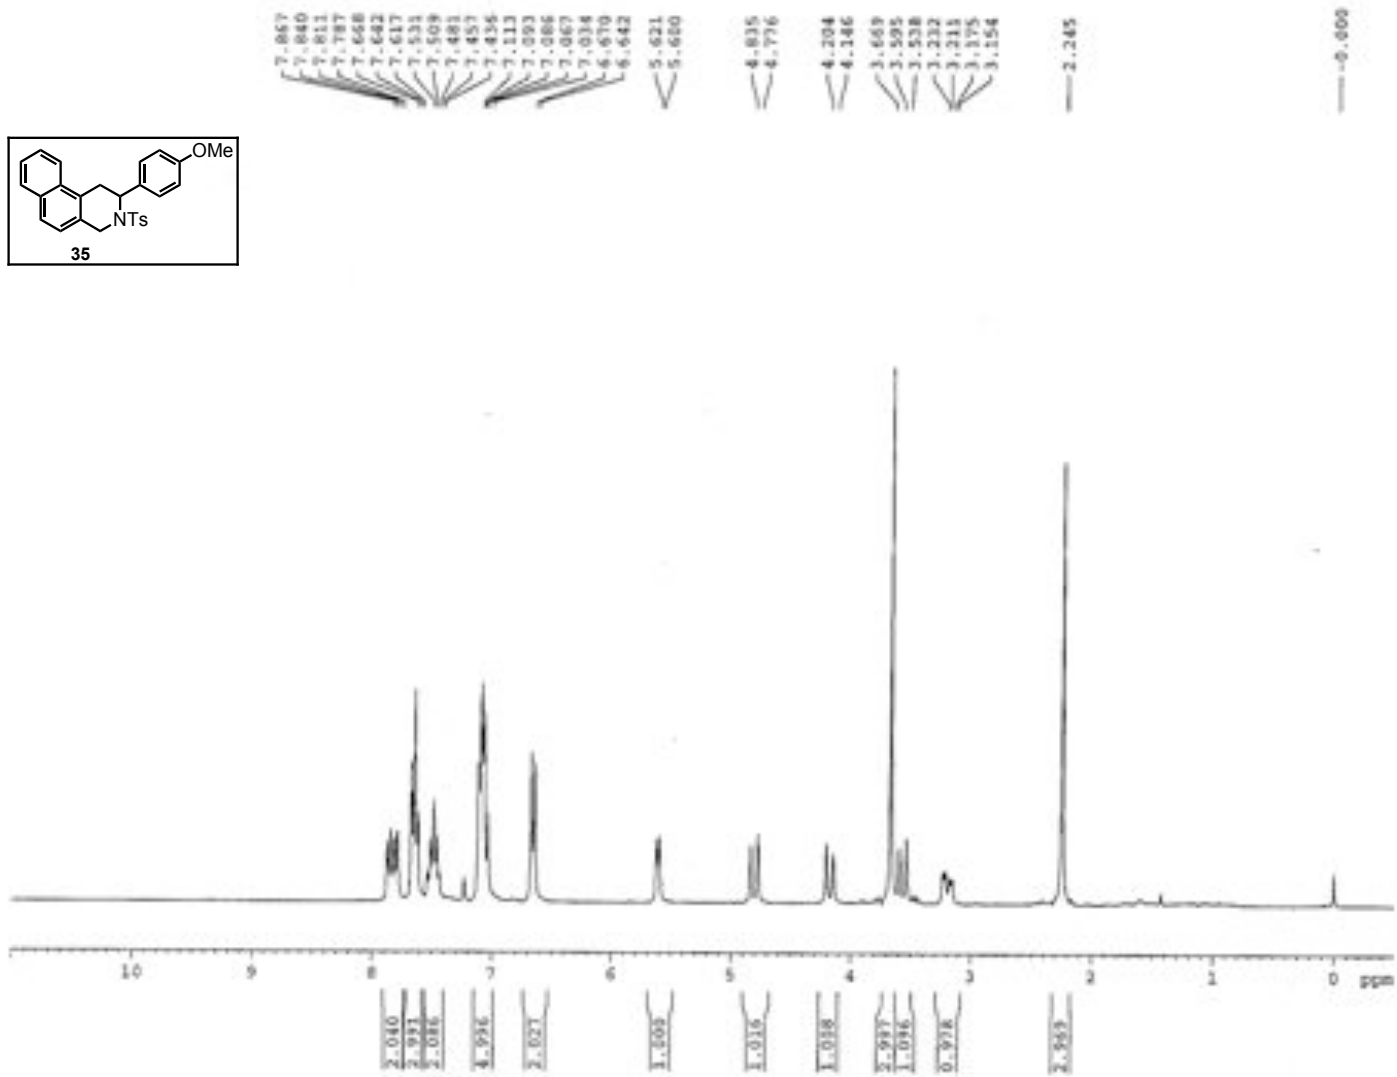

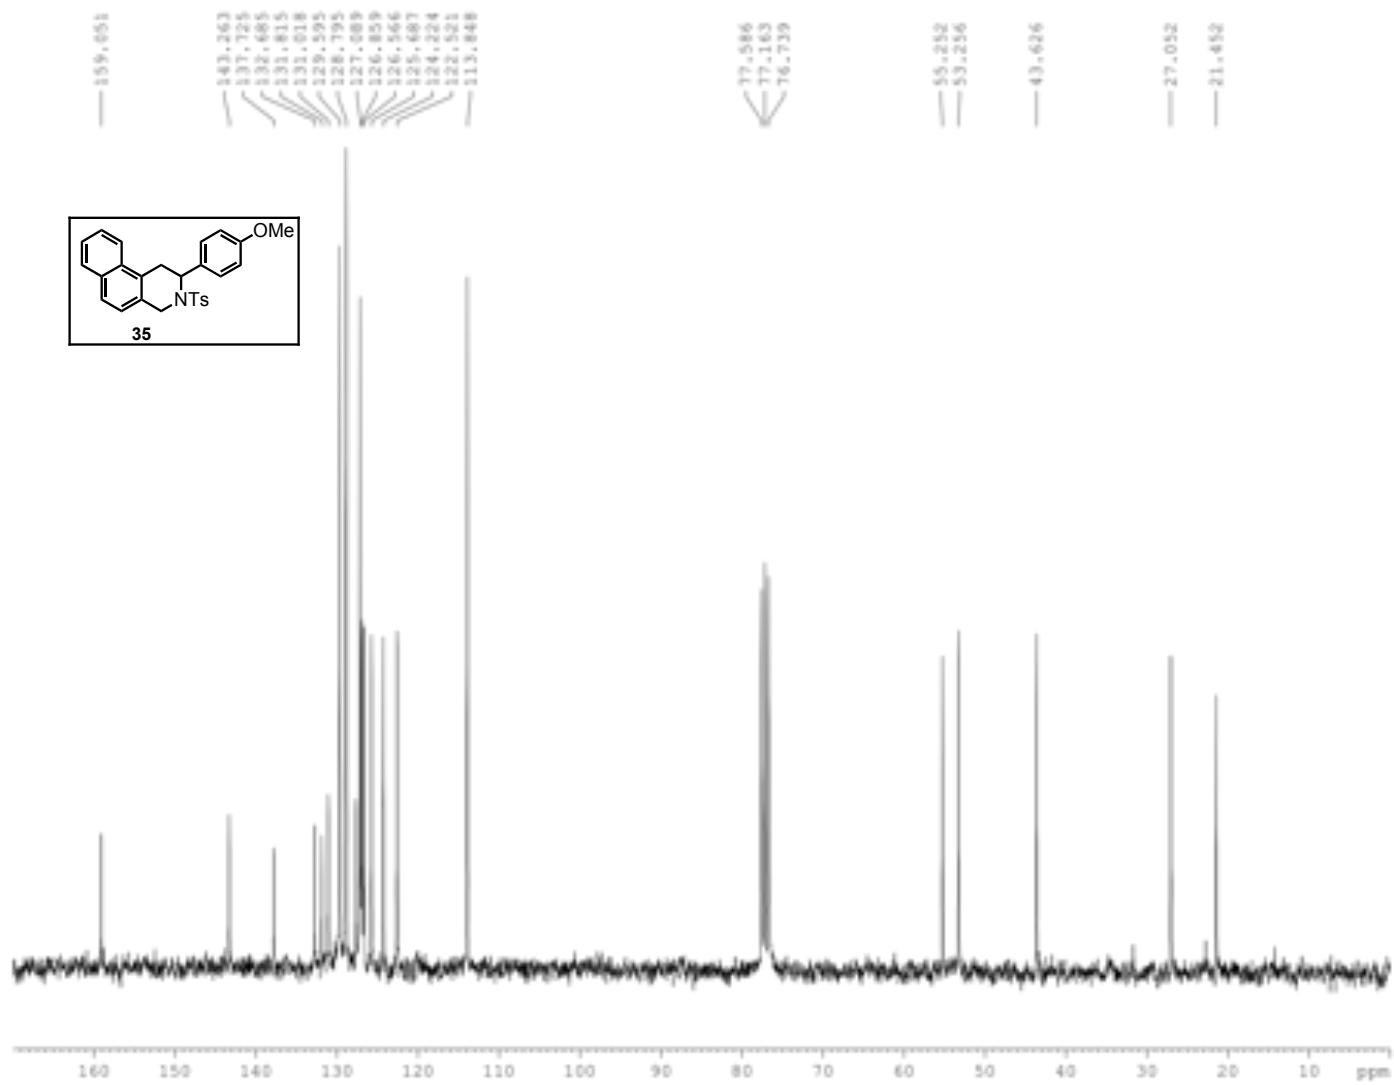

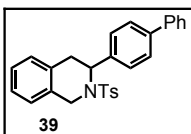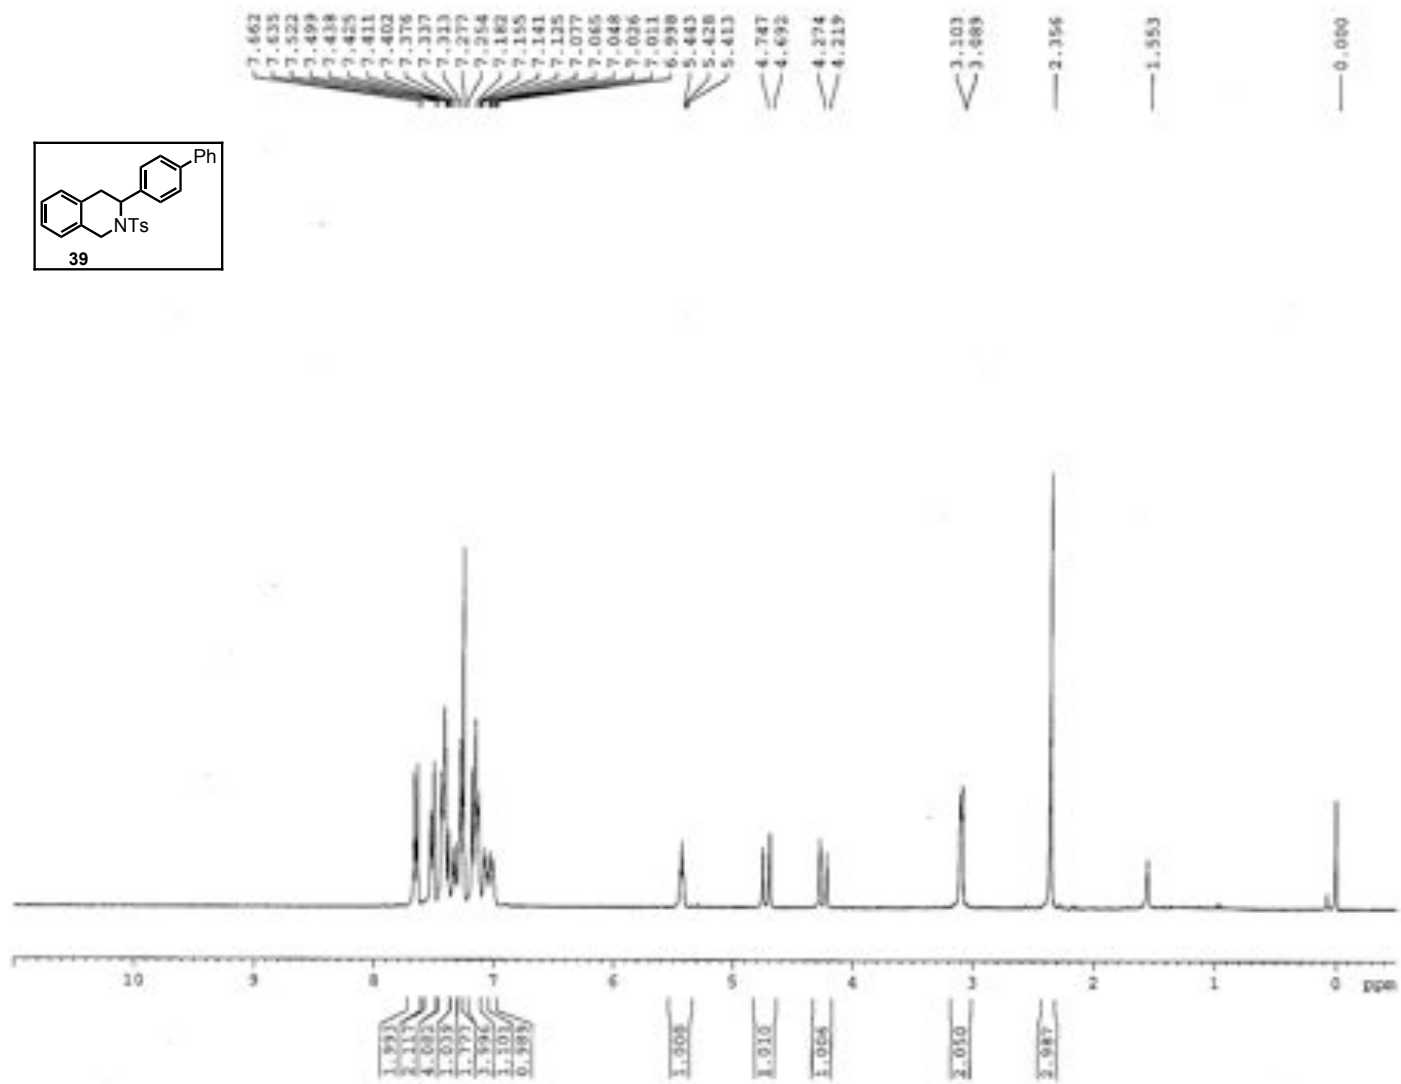

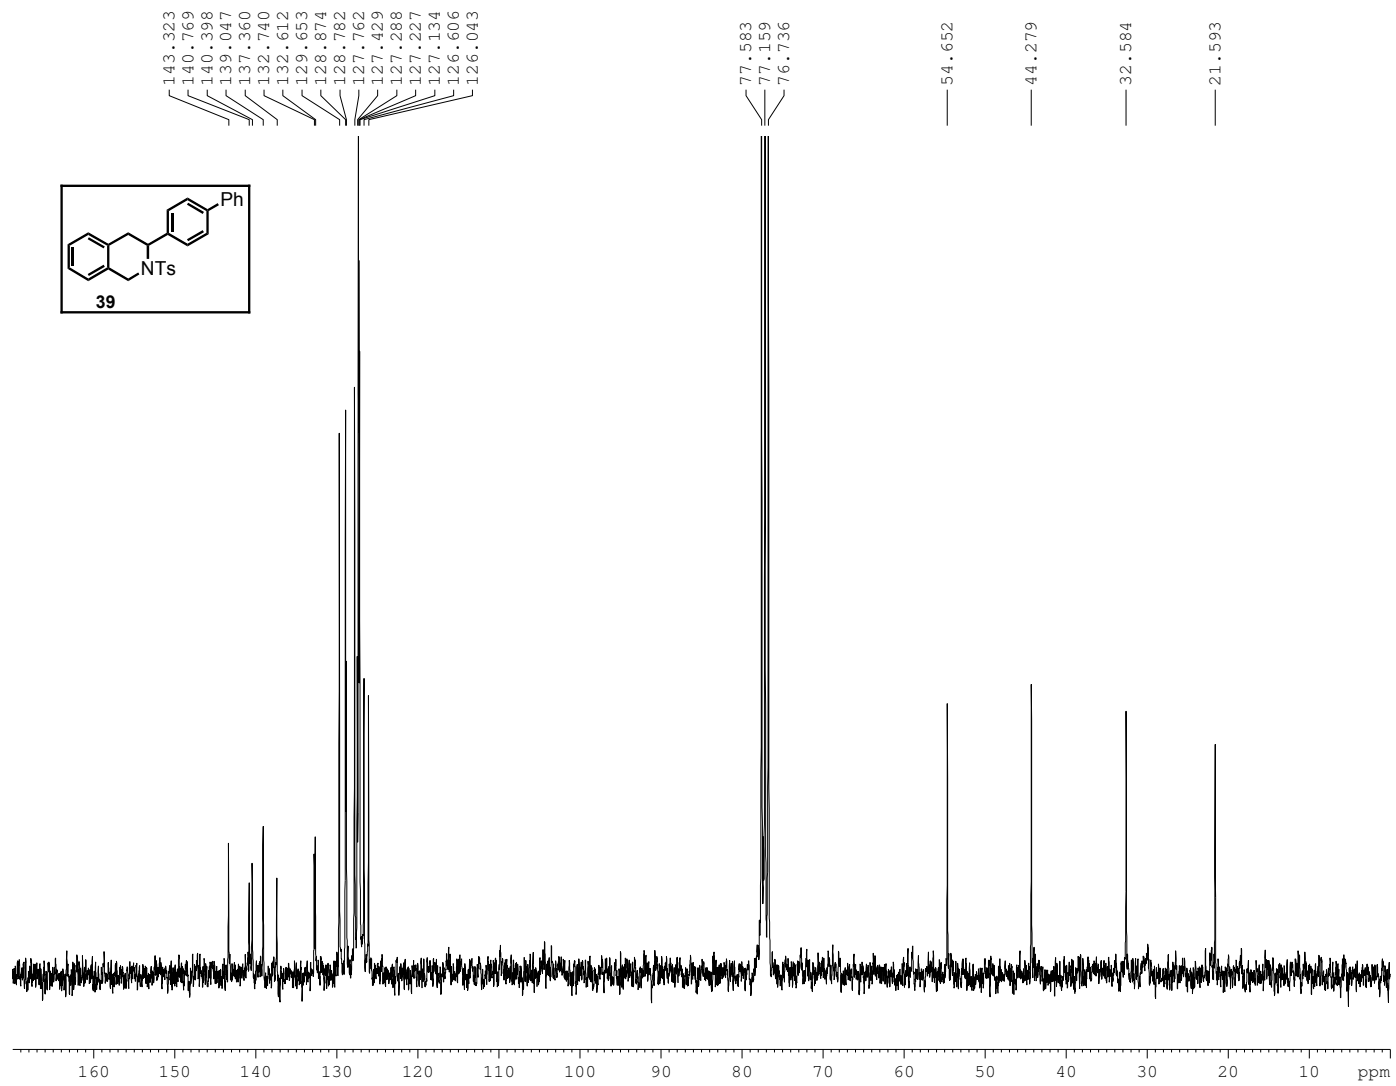



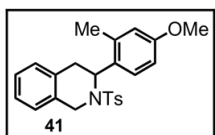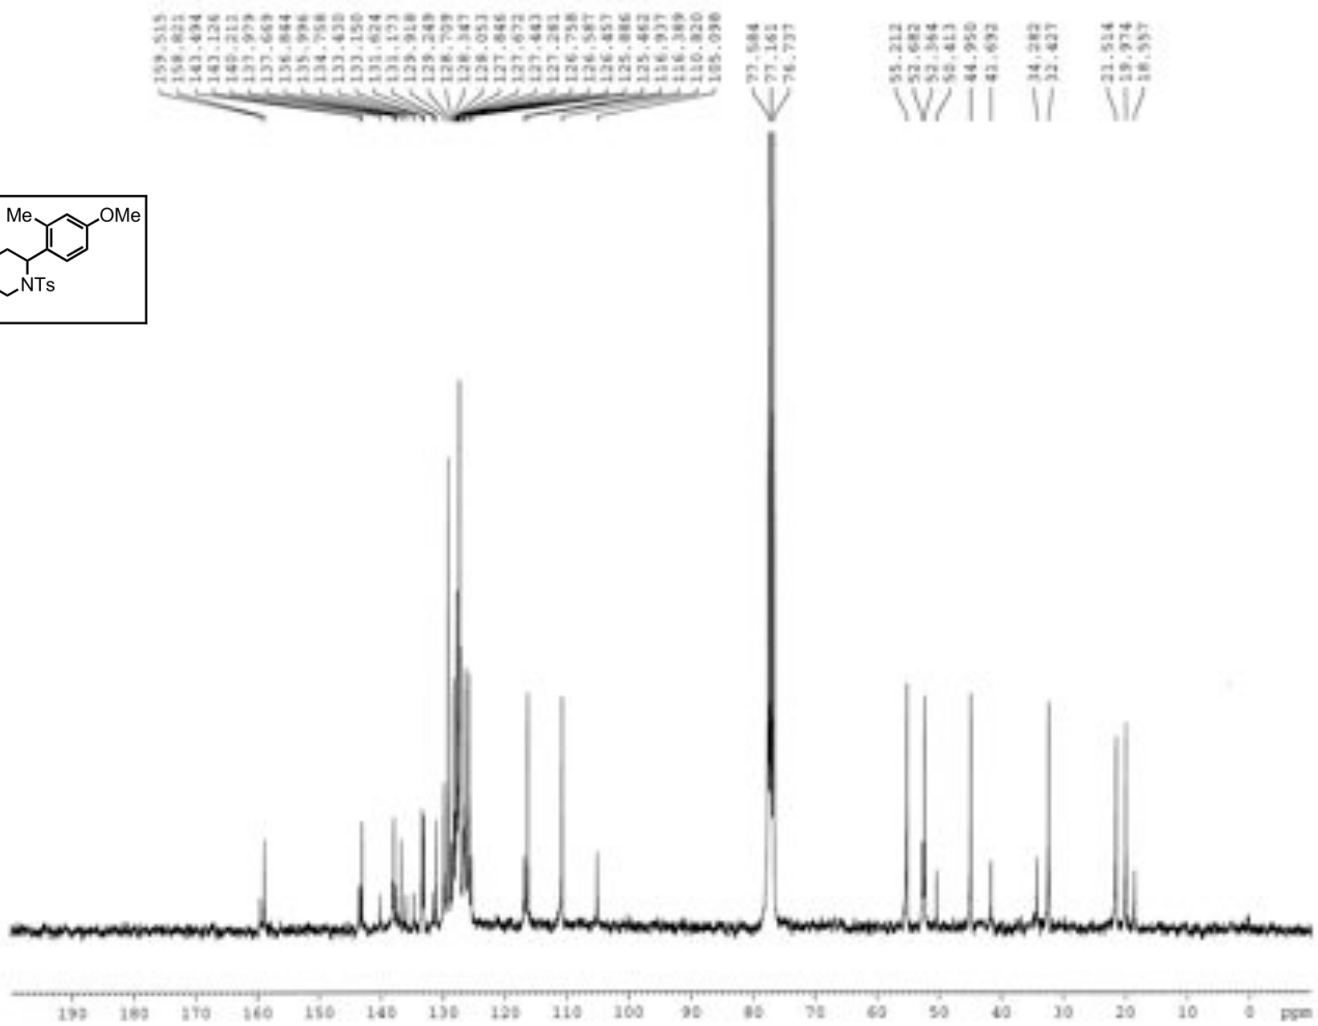



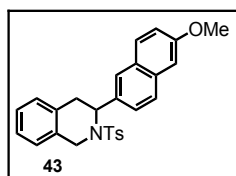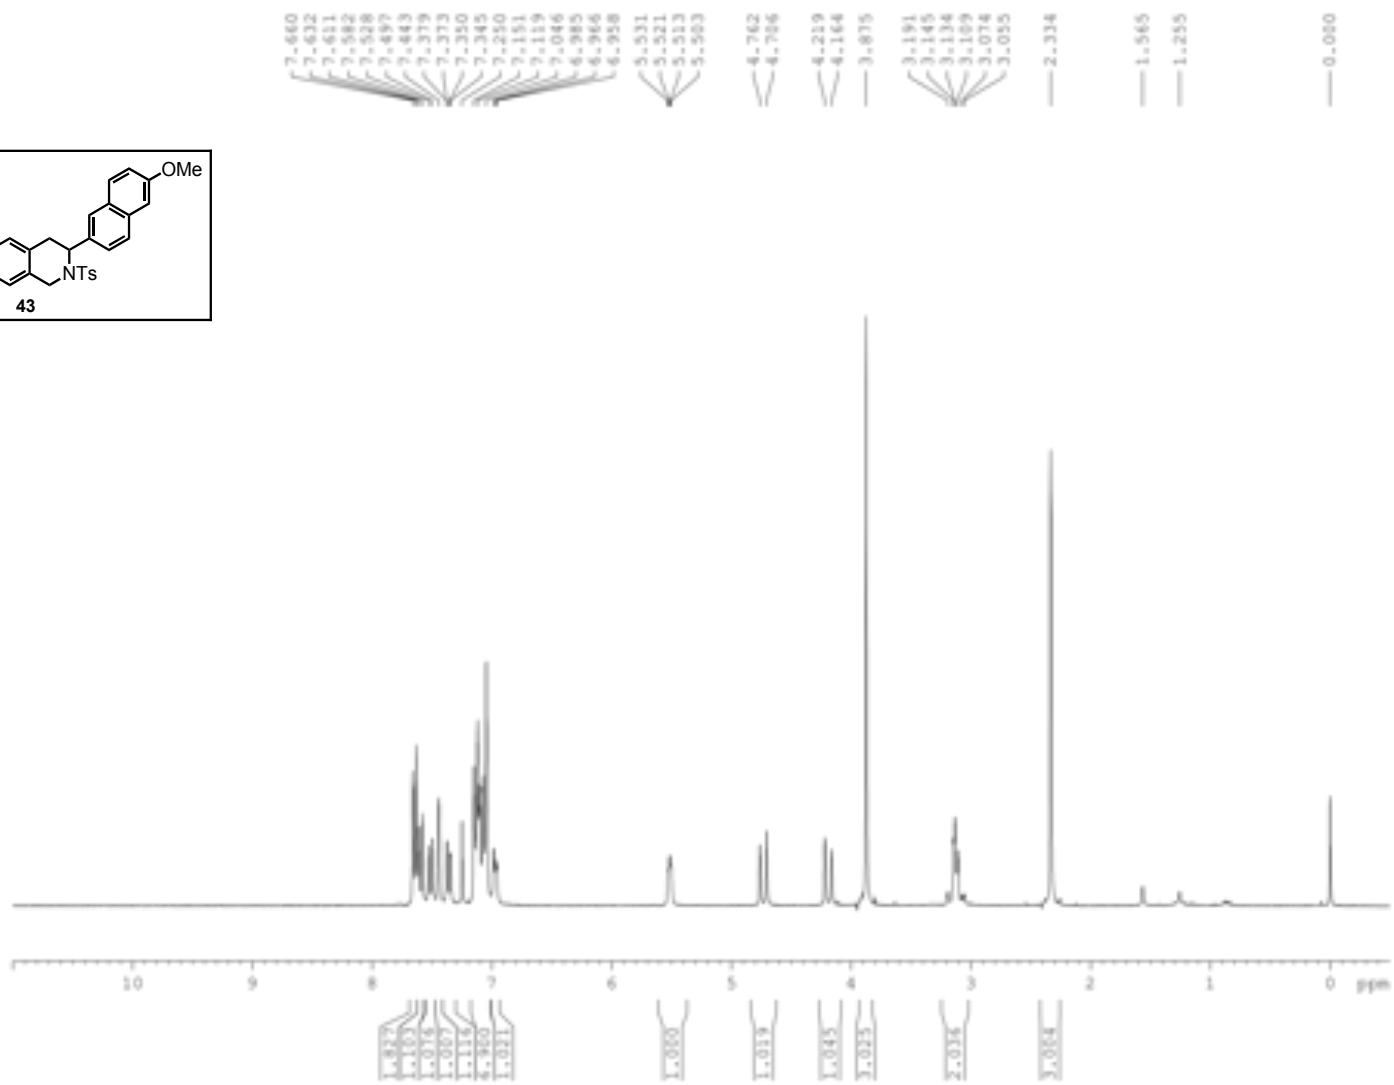

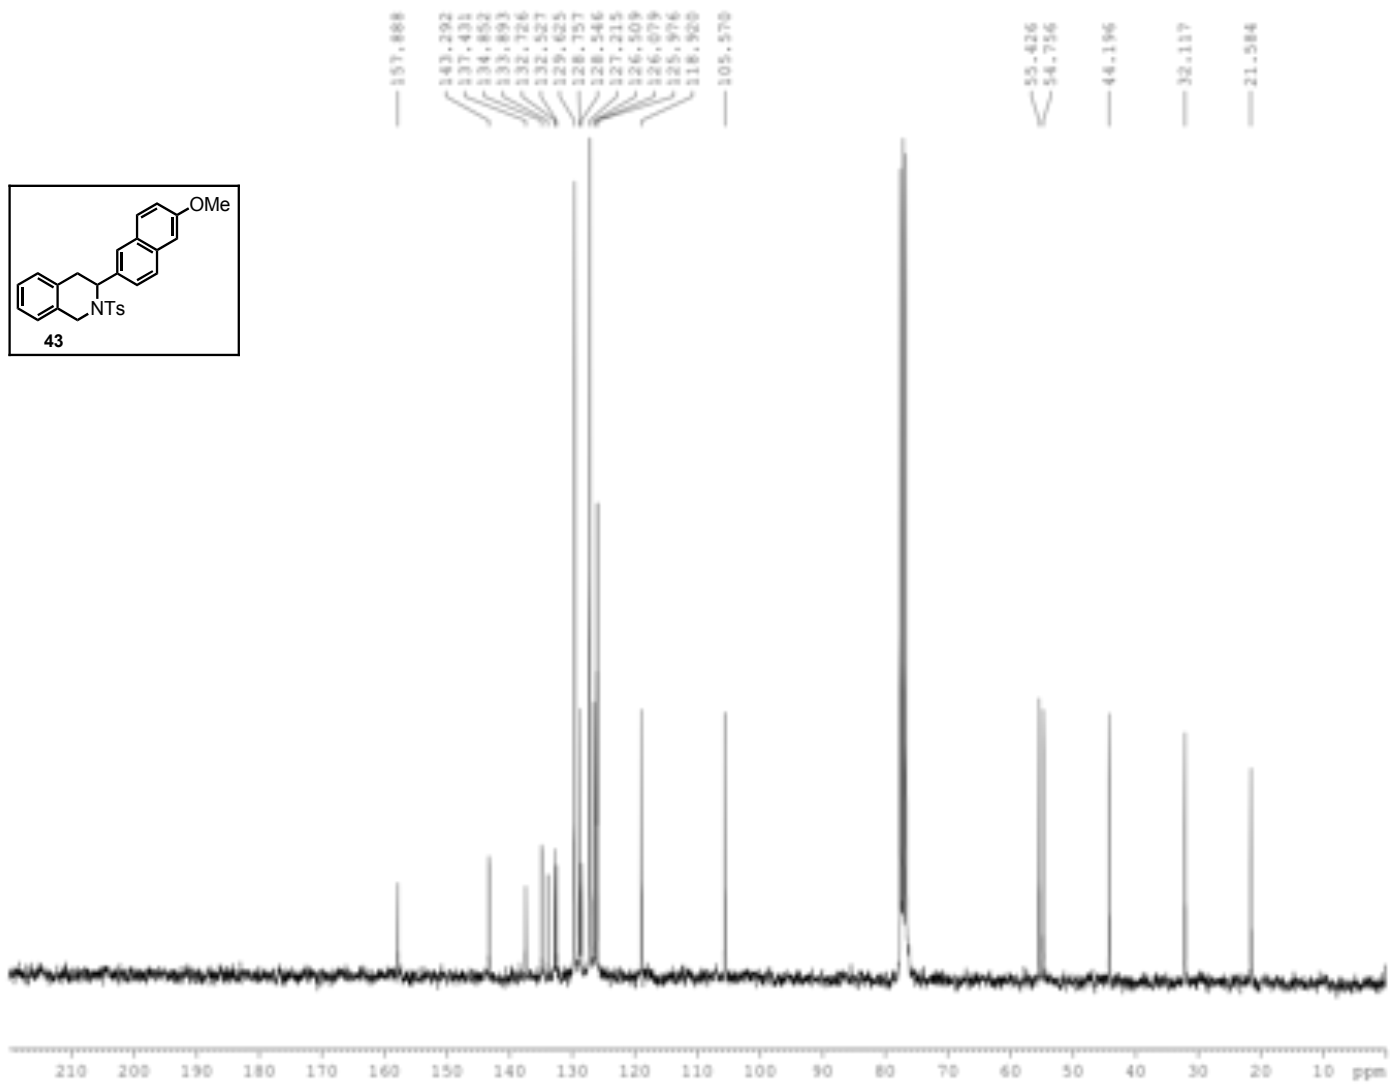

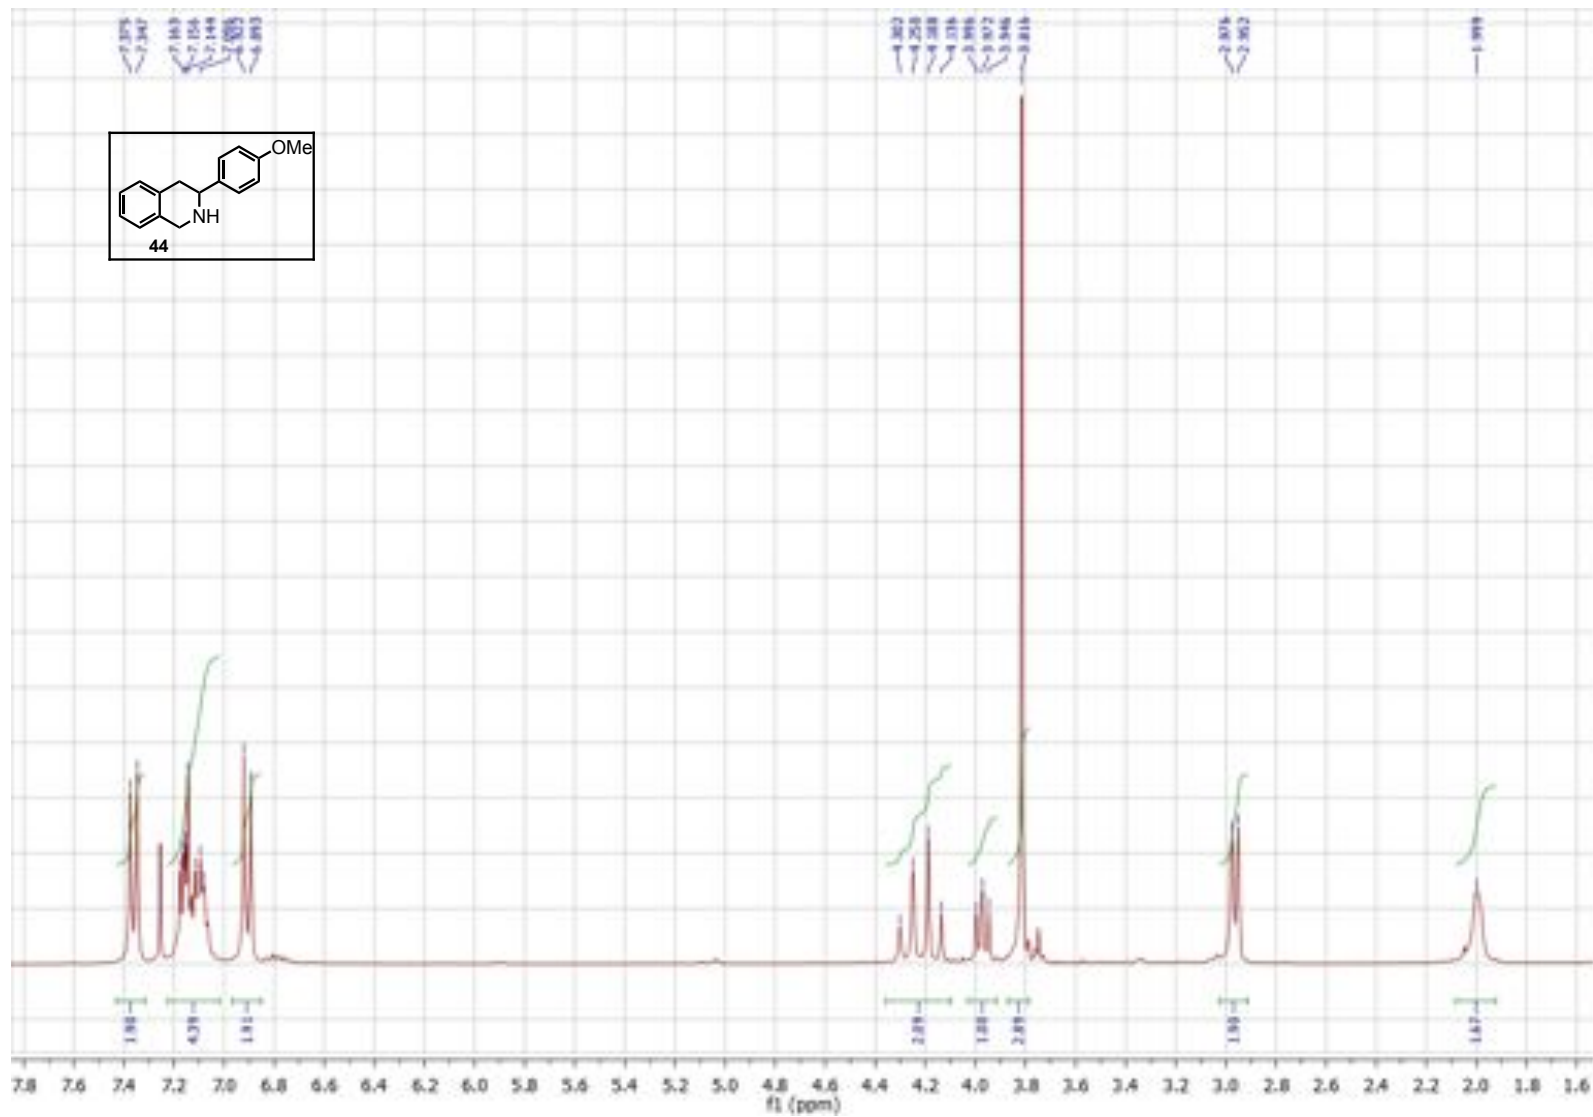

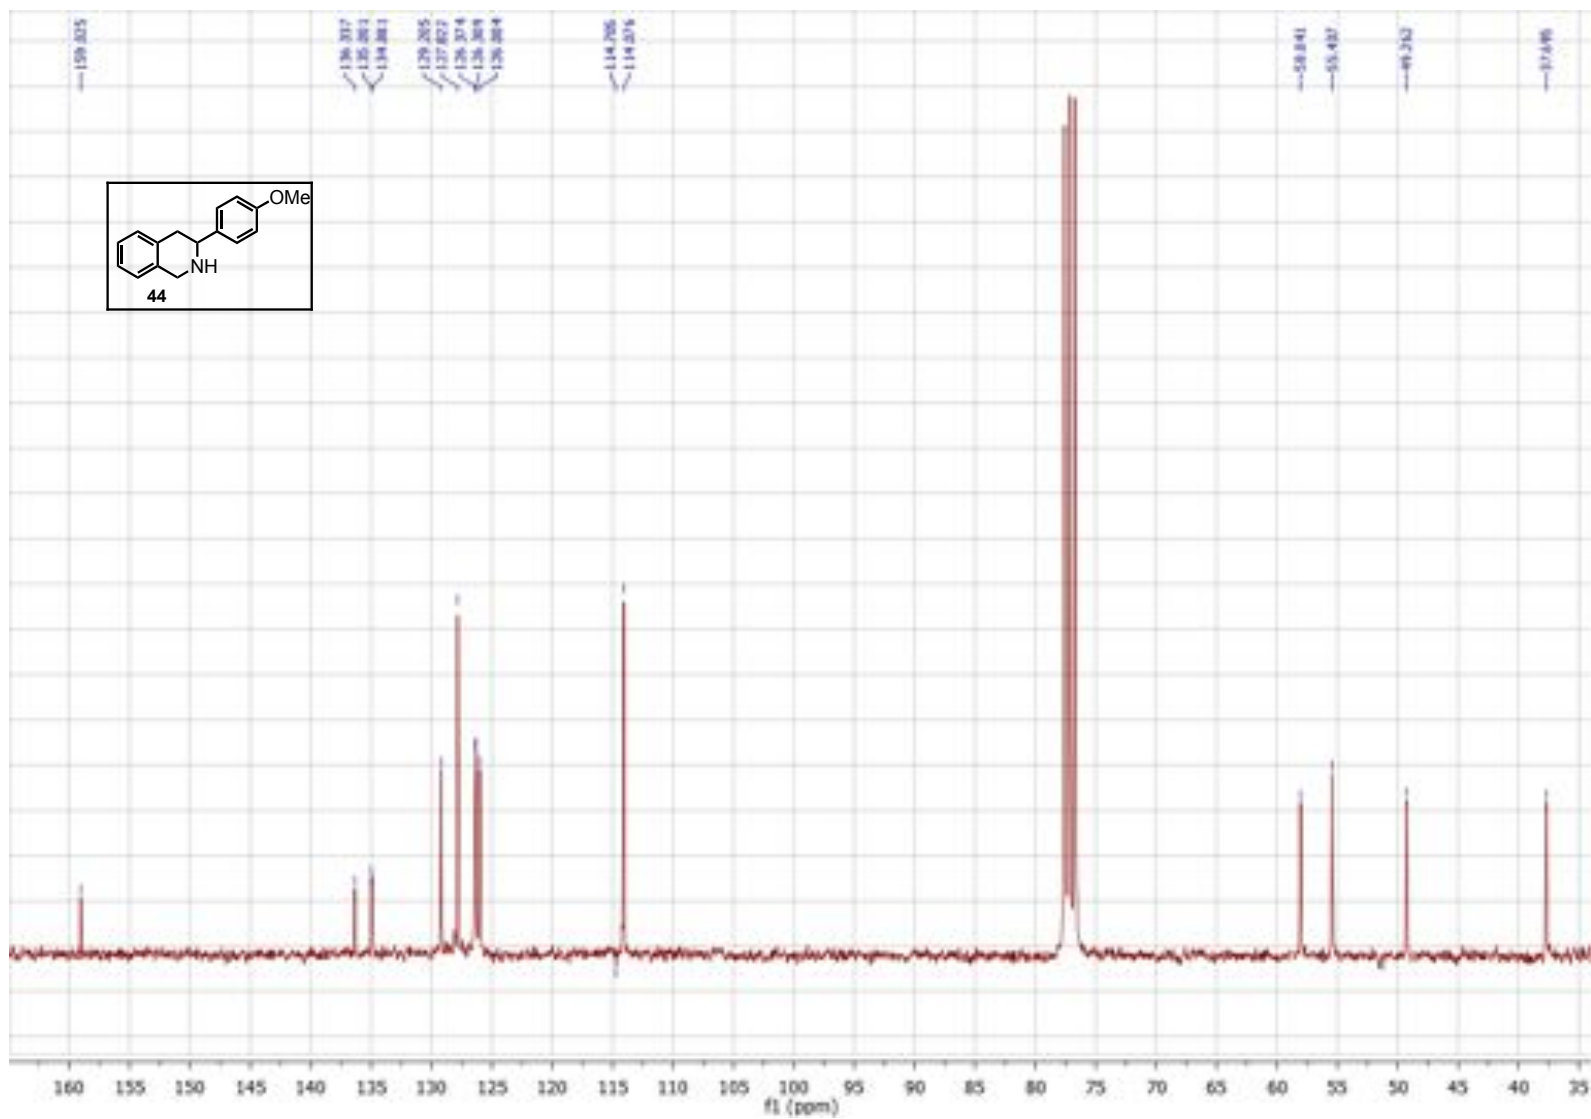

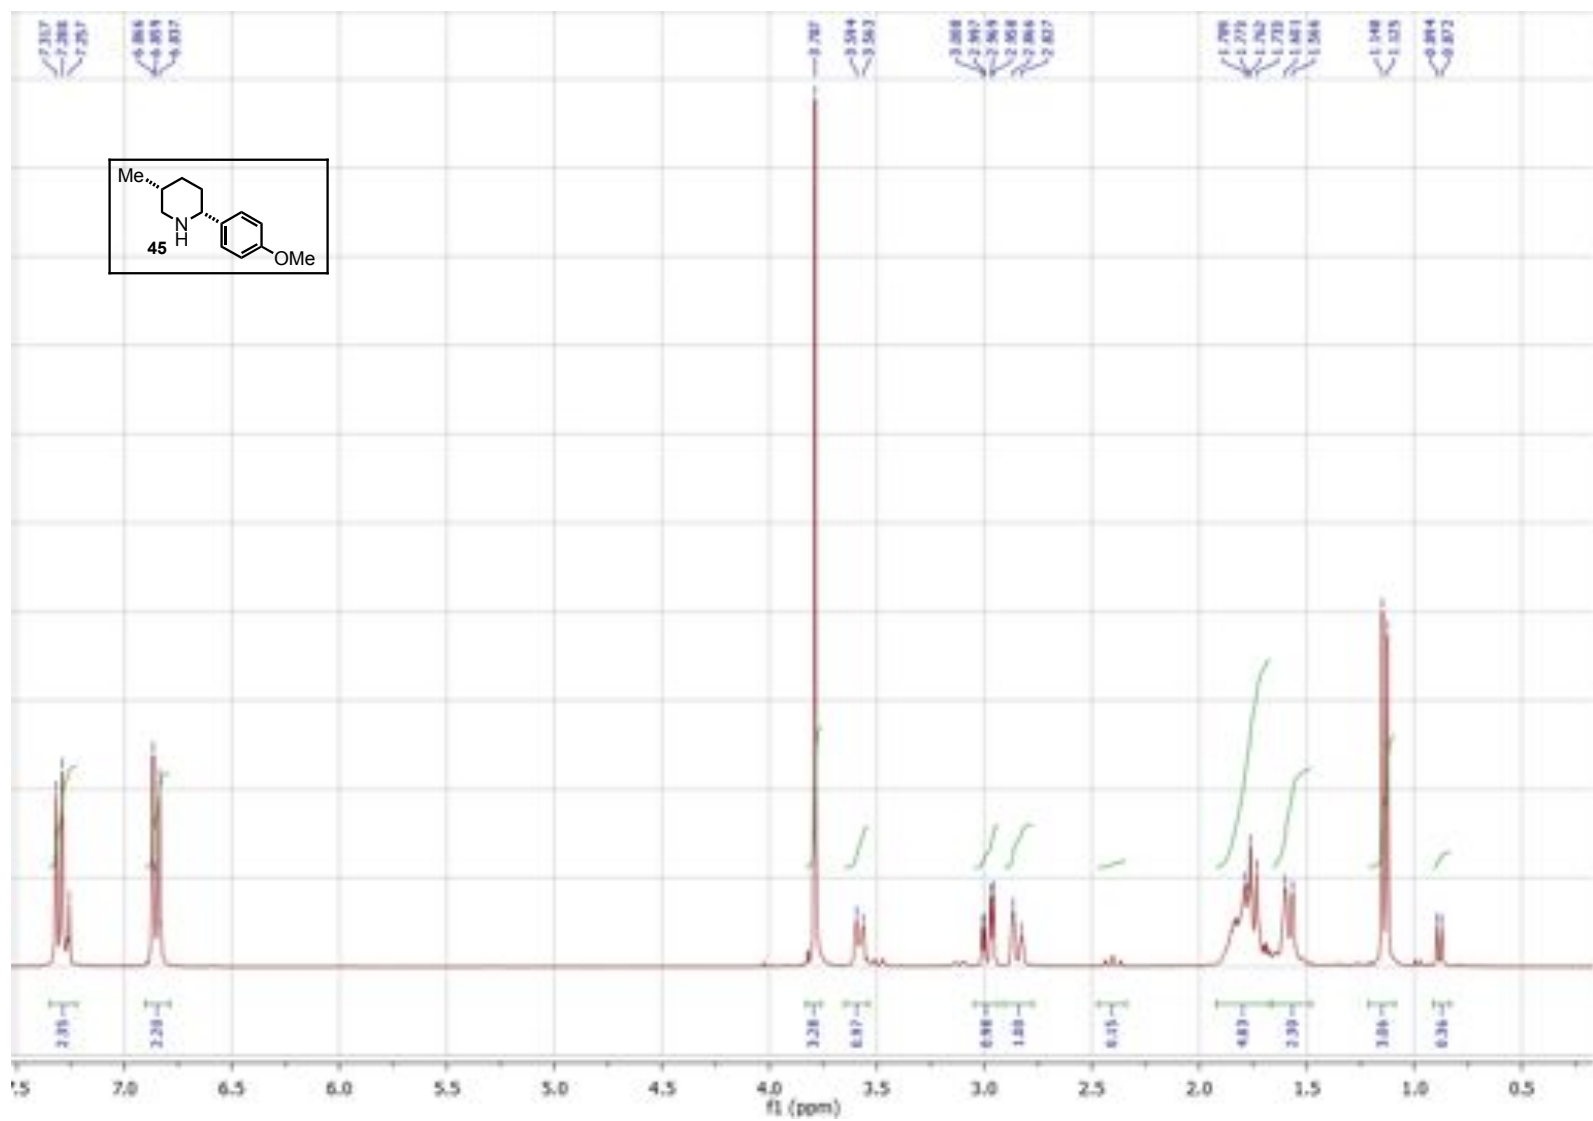

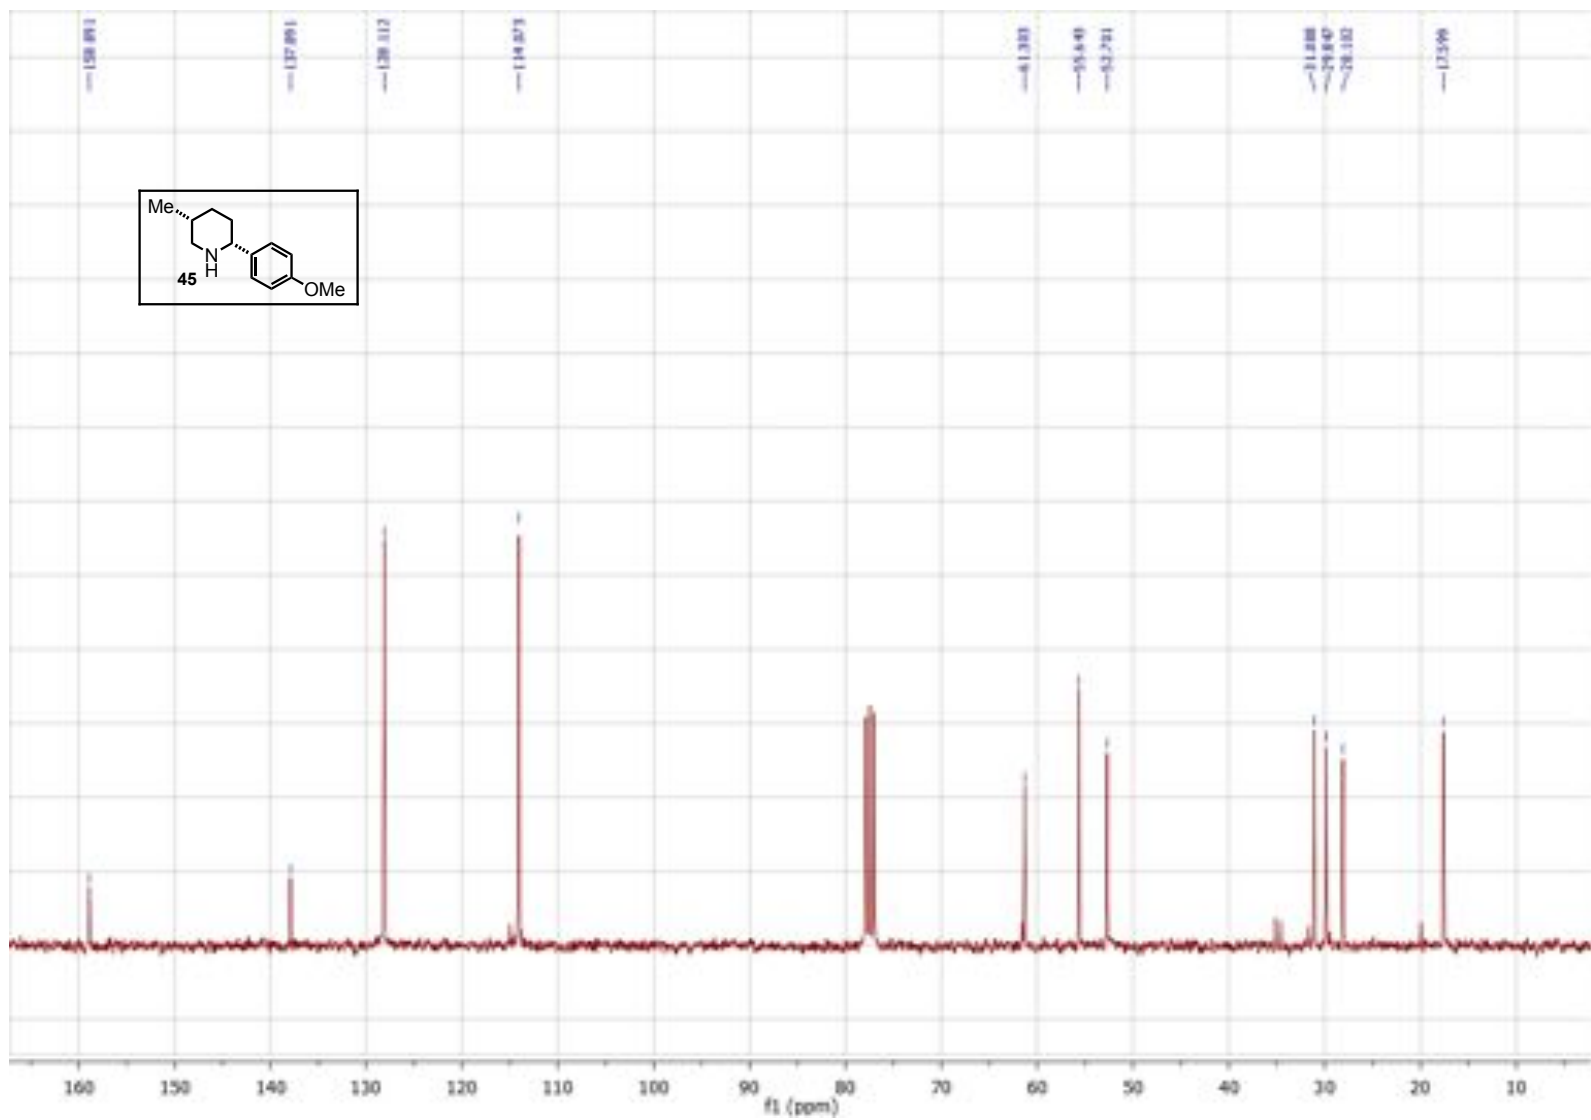

Supplement: NIHMS383244-supplement-3_si_003.pdf [file NIHMS383244-supplement-3_si_003.pdf]
