# Supplementary material
Source: PubMed Central journal article supplement (PMC3433405)
Supplement: NIHMS383244-supplement-1_si_001.pdf [file NIHMS383244-supplement-1_si_001.pdf]

# C-H Bond Functionalization via Hydride Transfer: Formation of $\alpha$ -Arylated Piperidines and 1,2,3,4-Tetrahydroisoquinolines via Stereoselective Intramolecular Amination of Benzylic C-H Bonds

Paul A. Vadola, Ignacio Carrera and Dalibor Sames\*

*Department of Chemistry, Columbia University,  
3000 Broadway, New York, New York, 10027*

## Supporting Information

|                                                                         |          |
|-------------------------------------------------------------------------|----------|
| <b>Part A. Lewis Acid Screen</b>                                        |          |
| <b>Table S1: The Effect of Various Metal Salts on Substrate 3</b> ..... | <b>2</b> |
| <b>Part B. Discussion of the Reactivity of Chiral Substrate S5:</b>     |          |
| B.1 Results of the HT-amination of chiral substrate <b>S5</b> .....     | <b>3</b> |
| B.2 Rationale for the HT-amination results of <b>S5</b> .....           | <b>4</b> |
| <b>Part C. X-Ray Data:</b>                                              |          |
| Product <b>11</b> .....                                                 | <b>5</b> |
| Product <b>19</b> .....                                                 | <b>7</b> |
| Product <b>39</b> .....                                                 | <b>9</b> |

## Part A. Lewis Acid Screen:

**Table S1:** The Effect of Various Metal Salts on Substrate **3**

| entry | reagent                                        | product <b>2</b> (%) | SM <b>3</b> (%) | imine <b>1</b> (%) |
|-------|------------------------------------------------|----------------------|-----------------|--------------------|
| 1     | BF <sub>3</sub> •OEt <sub>2</sub>              | 86                   | 0               | 0                  |
| 2     | TiF <sub>4</sub>                               | 82                   | 0               | 0                  |
| 3     | InCl <sub>3</sub>                              | 40                   | 32              | 27                 |
| 4     | HfCl <sub>4</sub>                              | 40                   | 0               | 0                  |
| 5     | In(OTf) <sub>3</sub>                           | 31                   | 34              | 33                 |
| 6     | AuBr <sub>3</sub>                              | 30                   | 17              | 39                 |
| 7     | PtCl <sub>4</sub>                              | 27                   | 2               | 0                  |
| 8     | TiCl <sub>4</sub>                              | 23                   | 0               | 0                  |
| 9     | Sc(OTf) <sub>3</sub>                           | 0                    | 25              | 75                 |
| 10    | ScCl <sub>3</sub>                              | 0                    | 43              | 56                 |
| 11    | Al(OTf) <sub>3</sub>                           | 0                    | 65              | 34                 |
| 12    | Cu(OTf) <sub>2</sub>                           | 0                    | 73              | 26                 |
| 13    | B(C <sub>6</sub> F <sub>5</sub> ) <sub>3</sub> | 0                    | 77              | 22                 |
| 14    | Ti(OEt) <sub>4</sub>                           | 0                    | 90              | 10                 |
| 15    | Zn(OTf) <sub>2</sub>                           | 0                    | 99              | 0                  |
| 16    | ZnCl <sub>2</sub>                              | 0                    | 99              | 0                  |
| 17    | PtCl <sub>2</sub>                              | 0                    | 99              | 0                  |
| 18    | AuCl                                           | 0                    | 83              | 0                  |
| 19    | Hf(OTf) <sub>4</sub>                           | 0                    | 0               | 0                  |
| 20    | AlCl <sub>3</sub>                              | 0                    | 0               | 0                  |

All reactions were setup under an argon atmosphere employing 2 equivalents of reagent in DCE at 0.05 M concentration to substrate **3** and heated in a reaction block at 80 °C. Yields were determined by <sup>1</sup>H NMR relative to 1,2,4,5-tetrachlorobenzene, which was used as an internal standard.

## Part B. Discussion of the Reactivity of Chiral Substrate S5:

### B.1 Results of the HT-amination of chiral substrate S5

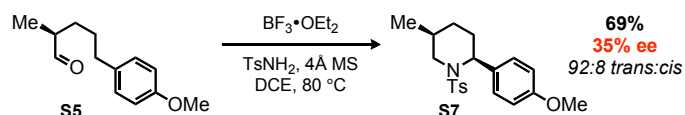

Enantiomeric excess analysis was carried out by HPLC using a Chiracel OD Column No. OD00CE-1G001 from Daicel Chemical Industries, LTD. 97 % Hexanes, 3% Isopropanol were used with a flow rate of 1 mL/min.

### Chromatogram obtained for racemic standard (compound 19)

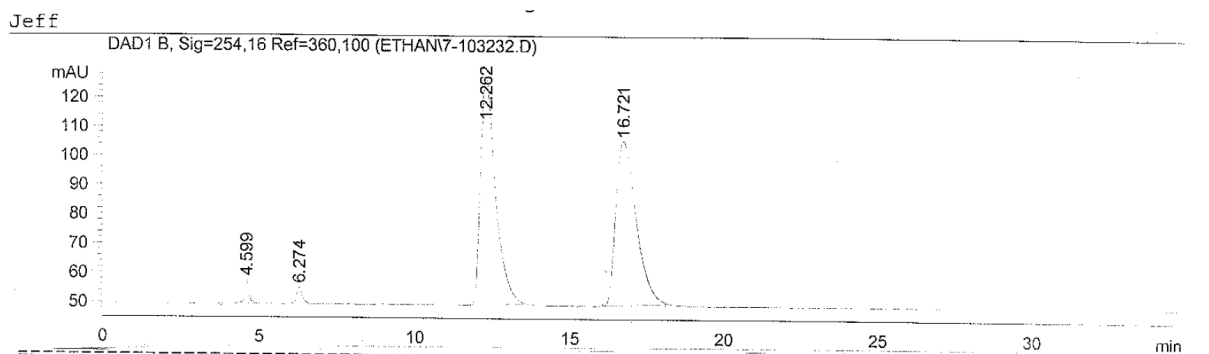

Area Percent Report

Sorted By : Signal  
Multiplier : 1.0000  
Dilution : 1.0000  
Sample Amount : 20.00000 [ng/ul] (not used in calc.)

Signal 1: DAD1 B, Sig=254,16 Ref=360,100

| Peak # | RetTime [min] | Type | Width [min] | Area [mAU*s] | Height [mAU] | Area %    |
|--------|---------------|------|-------------|--------------|--------------|-----------|
| 1      | 4.599         | VB   | 0.1310      | 70.19636     | 7.95279      | 1.3159    |
| 2      | 6.274         | BB   | 0.1913      | 72.44825     | 5.66007      | 1.3581    |
| 3      | 12.262        | BB   | 0.5030      | 2612.51147   | 77.95828     | 48.9740 • |
| 4      | 16.721        | BB   | 0.7140      | 2579.32520   | 56.13780     | 48.3519 • |

Totals : 5334.48128 147.70894

Results obtained with enhanced integrator!

## Chromatogram obtained for compound **S7**

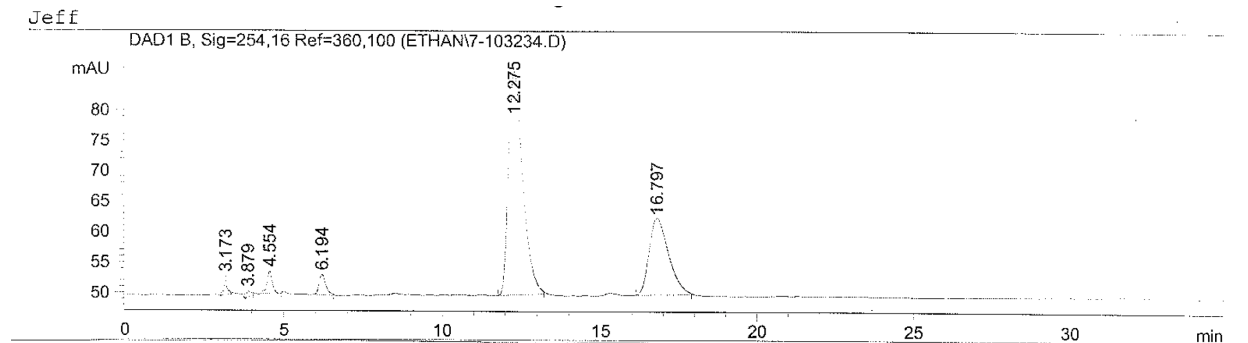

### Area Percent Report

Sorted By : Signal  
Multiplier : 1.0000  
Dilution : 1.0000  
Sample Amount : 20.00000 [ng/ul] (not used in calc.)

Signal 1: DAD1 B, Sig=254,16 Ref=360,100

| Peak # | RetTime [min] | Type | Width [min] | Area [mAU*s] | Height [mAU] | Area %  |
|--------|---------------|------|-------------|--------------|--------------|---------|
| 1      | 3.173         | PB   | 0.0862      | 19.88968     | 3.12586      | 1.0962  |
| 2      | 3.879         | PB   | 0.1162      | 9.29710      | 1.10399      | 0.5124  |
| 3      | 4.554         | BB   | 0.1802      | 44.38266     | 3.69423      | 2.4462  |
| 4      | 6.194         | BB   | 0.2244      | 50.22655     | 3.39892      | 2.7683  |
| 5      | 12.275        | BB   | 0.4767      | 1142.86926   | 36.76376     | 62.9904 |
| 6      | 16.797        | BB   | 0.6461      | 547.69031    | 12.57604     | 30.1865 |

Totals : 1814.35556 60.66280

Results obtained with enhanced integrator!

## B.2 Rationale for the HT-amination results of **S5**

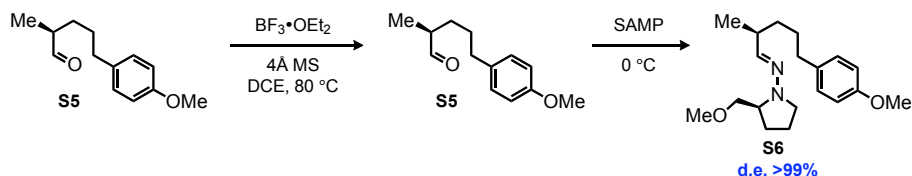

Substrate **S5** was subjected to the standard reaction conditions without the addition of toluenesulfonamide. After stirring for 2 hr at 80 °C the reaction was worked-up according to the general HT-amination procedure. The resulting crude aldehyde was converted to hydrazone **S6** as previously described. The resulting product was analyzed by <sup>1</sup>H NMR and was found to have a diastereomeric ratio of >99:1. This result indicated that under the reaction conditions the aldehyde does not undergo tautomerization by the action of BF<sub>3</sub>·OEt<sub>2</sub>. Given this observation we propose that the epimerization of the α-substituent occurs following formation of the intermediate imine, which likely proceeds through reversible imine-enamine tautomerization.

Part C. X-ray Data for Products 11, 19 and 39:

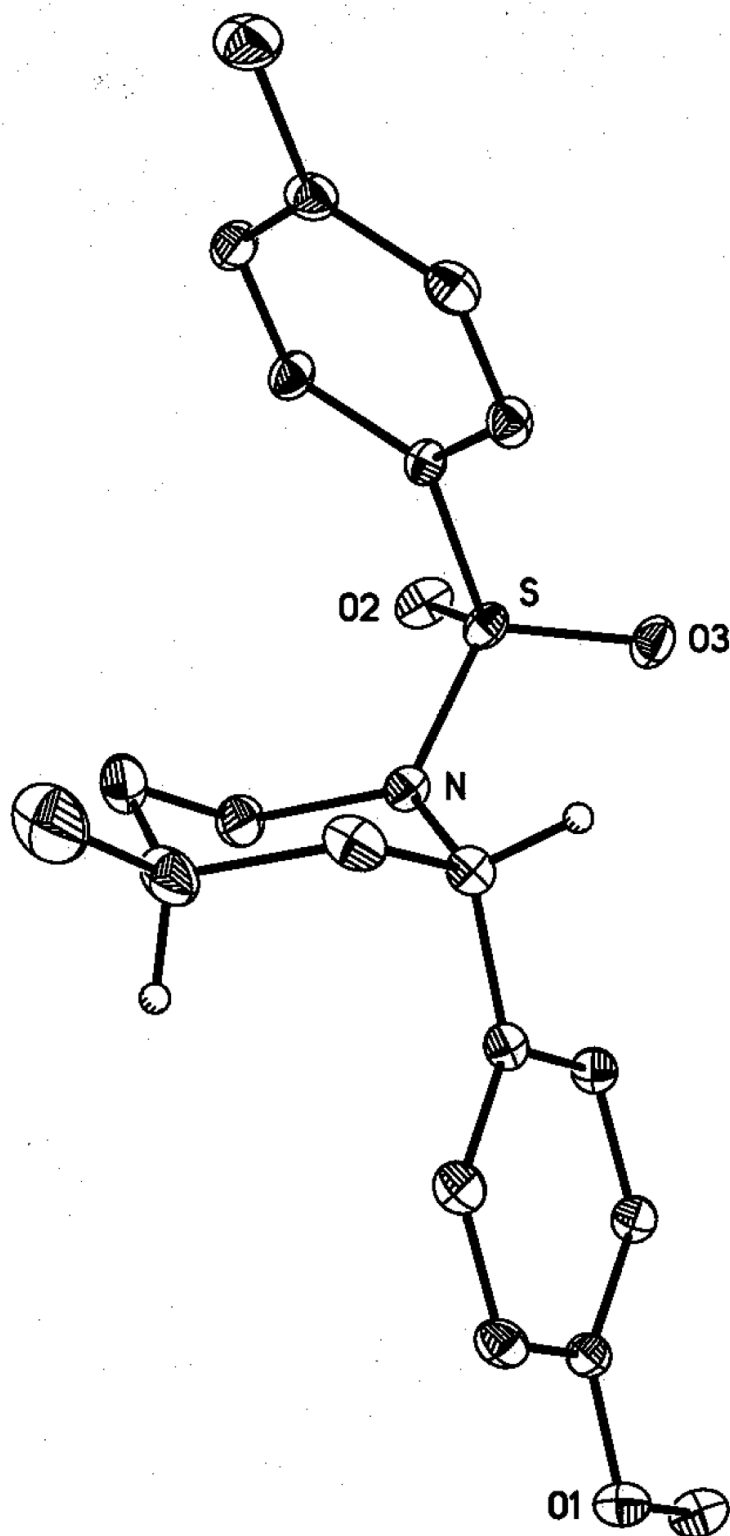

ORTEP of compound 11

|                                        |                                                                                                                                     |
|----------------------------------------|-------------------------------------------------------------------------------------------------------------------------------------|
| Compound                               | <b>11</b>                                                                                                                           |
| Empirical formula                      | C <sub>20</sub> H <sub>25</sub> NO <sub>3</sub> S                                                                                   |
| Formula weight                         | 359.47 g/mol                                                                                                                        |
| Temperature                            | 150(2) K                                                                                                                            |
| Wavelength                             | 0.71073 Å                                                                                                                           |
| Crystal system                         | monoclinic                                                                                                                          |
| Space group                            | P2 <sub>1</sub> /n                                                                                                                  |
| Unit cell dimensions                   | $a = 12.8046(7)$ Å $\alpha = 90^\circ$<br>$b = 10.1185(5)$ Å $\beta = 105.4920(10)^\circ$<br>$c = 15.2099(8)$ Å $\gamma = 90^\circ$ |
| Volume, Z                              | 1899.05(17) Å <sup>3</sup> , 4                                                                                                      |
| Density (calculated)                   | 1.257 Mg/m <sup>3</sup>                                                                                                             |
| Absorption coefficient                 | 0.188 mm <sup>-1</sup>                                                                                                              |
| F (000)                                | 768                                                                                                                                 |
| Crystal size                           | 0.45 x 0.40 x 0.30 mm                                                                                                               |
| $\Theta$ range for data collection     | 1.85 to 31.00°                                                                                                                      |
| Limiting indices                       | $-18 \leq h \leq 18, -14 \leq k \leq 14, -22 \leq l \leq 22$                                                                        |
| Reflections collected                  | 30712                                                                                                                               |
| Independent reflections                | 6072 ( $R_{\text{int}} = 0.0245$ )                                                                                                  |
| Completeness to $\Theta = 31.00^\circ$ | 100.0%                                                                                                                              |
| Absorption correction                  | EMPIRICAL                                                                                                                           |
| Max. and min. transmission             | 0.9456 and 0.9200                                                                                                                   |
| Refinement method                      | Full-matrix least-squares on F <sup>2</sup>                                                                                         |
| Data/restraints/parameters             | 6072 / 0 / 229                                                                                                                      |
| Goodness-of-fit on F <sup>2</sup>      | 1.027                                                                                                                               |
| Final R indices [ $I > 2\sigma(I)$ ]   | R1 = 0.0401, wR2 = 0.1090                                                                                                           |
| R indices (all data)                   | R1 = 0.0507, wR2 = 0.1186                                                                                                           |
| Largest diff. peak and hole            | 0.447 and -0.434 eÅ <sup>-3</sup>                                                                                                   |

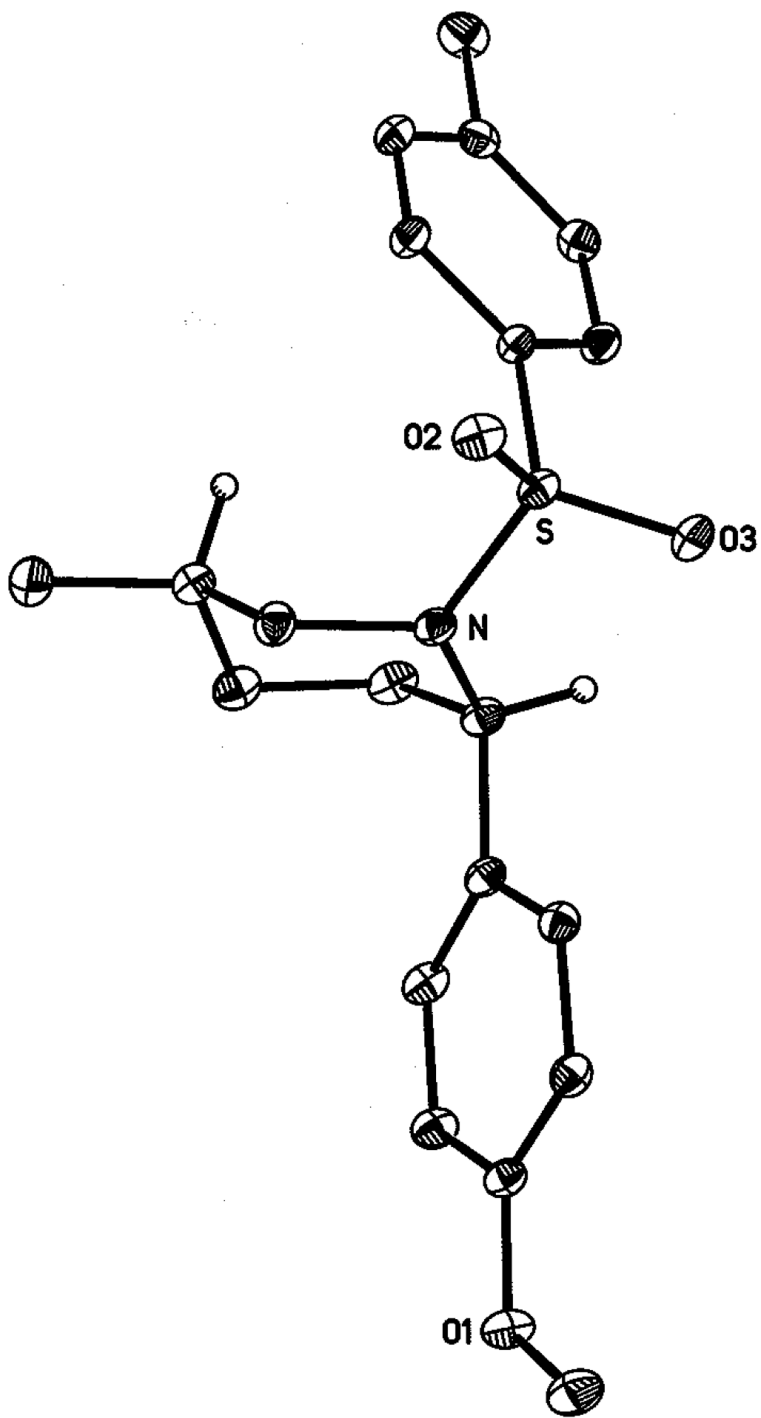

ORTEP of compound 19

|                                        |                                                                                                                                     |
|----------------------------------------|-------------------------------------------------------------------------------------------------------------------------------------|
| Compound                               | <b>19</b>                                                                                                                           |
| Empirical formula                      | C <sub>20</sub> H <sub>25</sub> NO <sub>3</sub> S                                                                                   |
| Formula weight                         | 359.47 g/mol                                                                                                                        |
| Temperature                            | 200(2) K                                                                                                                            |
| Wavelength                             | 0.71073 Å                                                                                                                           |
| Crystal system                         | monoclinic                                                                                                                          |
| Space group                            | P2 <sub>1</sub> /n                                                                                                                  |
| Unit cell dimensions                   | $a = 13.6482(7)$ Å $\alpha = 90^\circ$<br>$b = 10.2749(5)$ Å $\beta = 103.1450(10)^\circ$<br>$c = 13.7082(7)$ Å $\gamma = 90^\circ$ |
| Volume, Z                              | 1871.98(16) Å <sup>3</sup> , 4                                                                                                      |
| Density (calculated)                   | 1.257 Mg/m <sup>3</sup>                                                                                                             |
| Absorption coefficient                 | 0.191 mm <sup>-1</sup>                                                                                                              |
| F (000)                                | 768                                                                                                                                 |
| Crystal size                           | 0.31 x 0.25 x 0.25 mm                                                                                                               |
| $\Theta$ range for data collection     | 1.90 to 30.57°                                                                                                                      |
| Limiting indices                       | $-19 \leq h \leq 19, -14 \leq k \leq 14, -19 \leq l \leq 19$                                                                        |
| Reflections collected                  | 29321                                                                                                                               |
| Independent reflections                | 5757 ( $R_{\text{int}} = 0.0299$ )                                                                                                  |
| Completeness to $\Theta = 31.00^\circ$ | 99.9%                                                                                                                               |
| Absorption correction                  | EMPIRICAL                                                                                                                           |
| Max. and min. transmission             | 0.9538 and 0.9431                                                                                                                   |
| Refinement method                      | Full-matrix least-squares on F <sup>2</sup>                                                                                         |
| Data/restraints/parameters             | 5757 / 0 / 229                                                                                                                      |
| Goodness-of-fit on F <sup>2</sup>      | 1.035                                                                                                                               |
| Final R indices [ $I > 2\sigma(I)$ ]   | $R1 = 0.0482, wR2 = 0.1264$                                                                                                         |
| R indices (all data)                   | $R1 = 0.0655, wR2 = 0.1391$                                                                                                         |
| Largest diff. peak and hole            | 0.599 and -0.460 eÅ <sup>-3</sup>                                                                                                   |



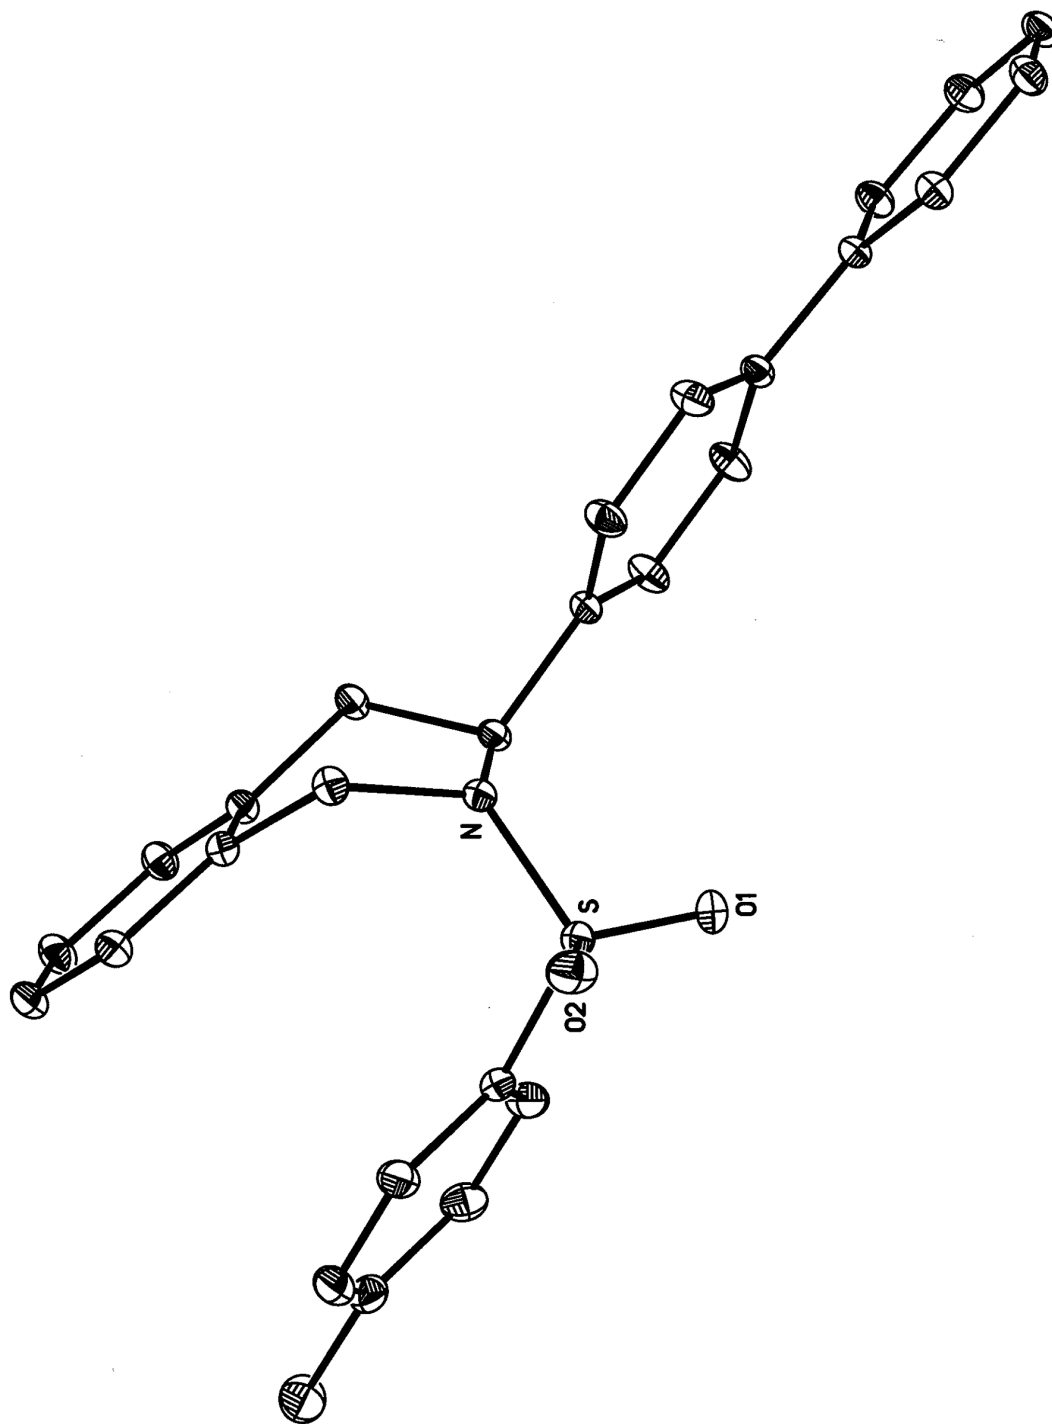

ORTEP of compound 39

|                                        |                                                                                                                                     |
|----------------------------------------|-------------------------------------------------------------------------------------------------------------------------------------|
| Compound                               | <b>39</b>                                                                                                                           |
| Empirical formula                      | C <sub>28</sub> H <sub>25</sub> NO <sub>2</sub> S                                                                                   |
| Formula weight                         | 439.55 g/mol                                                                                                                        |
| Temperature                            | 125(2) K                                                                                                                            |
| Wavelength                             | 0.71073 Å                                                                                                                           |
| Crystal system                         | monoclinic                                                                                                                          |
| Space group                            | C2/c                                                                                                                                |
| Unit cell dimensions                   | $a = 27.9292(15)$ Å $\alpha = 90^\circ$<br>$b = 8.1522(4)$ Å $\beta = 92.9860(10)^\circ$<br>$c = 19.4546(10)$ Å $\gamma = 90^\circ$ |
| Volume, Z                              | 4423.5(4) Å <sup>3</sup> , 8                                                                                                        |
| Density (calculated)                   | 1.320 Mg/m <sup>3</sup>                                                                                                             |
| Absorption coefficient                 | 0.173 mm <sup>-1</sup>                                                                                                              |
| F (000)                                | 1856                                                                                                                                |
| Crystal size                           | 0.43 x 0.40 x 0.10 mm                                                                                                               |
| $\Theta$ range for data collection     | 1.46 to 30.50°                                                                                                                      |
| Limiting indices                       | $-39 \leq h \leq 39, -11 \leq k \leq 11, -27 \leq l \leq 27$                                                                        |
| Reflections collected                  | 34522                                                                                                                               |
| Independent reflections                | 6754 ( $R_{\text{int}} = 0.0222$ )                                                                                                  |
| Completeness to $\Theta = 31.00^\circ$ | 99.9%                                                                                                                               |
| Absorption correction                  | EMPIRICAL                                                                                                                           |
| Max. and min. transmission             | 0.9829 and 0.9295                                                                                                                   |
| Refinement method                      | Full-matrix least-squares on F <sup>2</sup>                                                                                         |
| Data/restraints/parameters             | 6754 / 0 / 290                                                                                                                      |
| Goodness-of-fit on F <sup>2</sup>      | 1.042                                                                                                                               |
| Final R indices [ $I > 2\sigma(I)$ ]   | $R1 = 0.0402, wR2 = 0.1050$                                                                                                         |
| R indices (all data)                   | $R1 = 0.0471, wR2 = 0.1118$                                                                                                         |
| Largest diff. peak and hole            | 0.575 and -0.298 eÅ <sup>-3</sup>                                                                                                   |
